# Supplementary material for: Genome sequence of the banana aphid, Pentalonia nigronervosa Coquerel (Hemiptera: Aphididae) and its symbionts
Source: bioRxiv preprint, doi:10.1101/2020.04.25.060517, version 1 (2020-04-25)
Supplement: Supplementary Table 3 [file 060517_file05.xlsx]

## Sheet: interproscan_LTPG
Supplementary Table 3: InterProScan anntation of P. nigronervosa v1 proteins.
Gene ID	Protein length	PFAM domain	PFAM description	Domain start	Domain end	E-value	InterProScan domain	InterProScan description	GO terms asscociated with
g1763.t4	2686	PF01049	Cadherin cytoplasmic region	2536	2676	5.3e-47	IPR000233	Cadherin, cytoplasmic domain	GO:0005509|GO:0007156|GO:0016020
g1763.t4	2686	PF02210	Laminin G domain	2257	2391	1.5e-24	IPR001791	Laminin G domain
g1763.t4	2686	PF02210	Laminin G domain	2004	2164	9.5e-27	IPR001791	Laminin G domain
g1763.t4	2686	PF12661	Human growth factor-like EGF	2197	2218	0.043	IPR013032	EGF-like, conserved site
g1763.t4	2686	PF00028	Cadherin domain	961	1046	5.5e-18	IPR002126	Cadherin	GO:0005509|GO:0007156|GO:0016020
g1763.t4	2686	PF00028	Cadherin domain	38	106	1.1e-07	IPR002126	Cadherin	GO:0005509|GO:0007156|GO:0016020
g1763.t4	2686	PF00028	Cadherin domain	566	653	6.1e-15	IPR002126	Cadherin	GO:0005509|GO:0007156|GO:0016020
g1763.t4	2686	PF00028	Cadherin domain	346	439	5.8e-08	IPR002126	Cadherin	GO:0005509|GO:0007156|GO:0016020
g1763.t4	2686	PF00028	Cadherin domain	457	550	1e-19	IPR002126	Cadherin	GO:0005509|GO:0007156|GO:0016020
g1763.t4	2686	PF00028	Cadherin domain	1464	1554	2.4e-17	IPR002126	Cadherin	GO:0005509|GO:0007156|GO:0016020
g1763.t4	2686	PF00028	Cadherin domain	1130	1217	2.6e-12	IPR002126	Cadherin	GO:0005509|GO:0007156|GO:0016020
g1763.t4	2686	PF00028	Cadherin domain	1234	1329	2.3e-12	IPR002126	Cadherin	GO:0005509|GO:0007156|GO:0016020
g1763.t4	2686	PF00028	Cadherin domain	137	227	1.4e-07	IPR002126	Cadherin	GO:0005509|GO:0007156|GO:0016020
g1763.t4	2686	PF00028	Cadherin domain	1571	1670	7.8e-08	IPR002126	Cadherin	GO:0005509|GO:0007156|GO:0016020
g1763.t4	2686	PF00028	Cadherin domain	732	829	1.5e-10	IPR002126	Cadherin	GO:0005509|GO:0007156|GO:0016020
g1763.t4	2686	PF00028	Cadherin domain	847	926	1.6e-15	IPR002126	Cadherin	GO:0005509|GO:0007156|GO:0016020
g1763.t4	2686	PF00028	Cadherin domain	246	327	1.2e-11	IPR002126	Cadherin	GO:0005509|GO:0007156|GO:0016020
g1763.t4	2686	PF00008	EGF-like domain	1943	1973	1.3e-07	IPR000742	EGF-like domain	GO:0005515
g1763.t4	2686	PF00008	EGF-like domain	2465	2496	0.00015	IPR000742	EGF-like domain	GO:0005515
g23583.t1	299	PF02544	3-oxo-5-alpha-steroid 4-dehydrogenase	189	299	4.8e-18	IPR001104	3-oxo-5-alpha-steroid 4-dehydrogenase, C-terminal	GO:0005737|GO:0006629|GO:0016021|GO:0016627
g7675.t1	1171	PF00520	Ion transport protein	244	510	3.3e-64	IPR005821	Ion transport domain	GO:0005216|GO:0006811|GO:0016020|GO:0055085
g7675.t1	1171	PF00520	Ion transport protein	562	812	2.1e-54	IPR005821	Ion transport domain	GO:0005216|GO:0006811|GO:0016020|GO:0055085
g7675.t1	1171	PF16905	Voltage-dependent L-type calcium channel, IQ-associated	818	879	3.2e-09	IPR031649	Voltage-dependent L-type calcium channel, IQ-associated domain
g14383.t1	137	PF03564	Protein of unknown function (DUF1759)	20	129	7.5e-18	IPR005312	Protein of unknown function DUF1759
g2938.t1	438	PF09995	Uncharacterized protein conserved in bacteria (DUF2236)	135	373	1.9e-27	IPR018713	Domain of unknown function DUF2236
g12324.t1	484	PF16858	Condensin II complex subunit CAP-H2 or CNDH2, C-term	319	472	1e-24	IPR031737	Condensin-2 complex subunit H2, C-terminal
g25036.t1	75	PF01462	Leucine rich repeat N-terminal domain	30	58	2.4e-06	IPR000372	Leucine-rich repeat N-terminal domain
g1782.t1	374	PF00288	GHMP kinases N terminal domain	104	158	9.2e-07	IPR006204	GHMP kinase N-terminal domain	GO:0005524
g423.t1	497	PF15963	Myb DNA-binding like	280	362	5.5e-28
g9885.t1	912	PF02883	Adaptin C-terminal domain	689	780	1.4e-06	IPR008152	Clathrin adaptor, alpha/beta/gamma-adaptin, appendage, Ig-like subdomain	GO:0006886|GO:0016192|GO:0030131
g9885.t1	912	PF01602	Adaptin N terminal region	15	533	7.8e-162	IPR002553	Clathrin/coatomer adaptor, adaptin-like, N-terminal	GO:0006886|GO:0016192|GO:0030117
g9885.t1	912	PF09066	Beta2-adaptin appendage, C-terminal sub-domain	803	910	1.2e-32	IPR015151	Beta-adaptin appendage, C-terminal subdomain	GO:0006886|GO:0016192|GO:0030131
g13223.t1	257	PF02270	Transcription initiation factor IIF, beta subunit	6	99	2.5e-15	IPR003196	Transcription initiation factor IIF, beta subunit	GO:0005674|GO:0006366|GO:0006367
g13223.t1	257	PF02270	Transcription initiation factor IIF, beta subunit	107	245	1.5e-38	IPR003196	Transcription initiation factor IIF, beta subunit	GO:0005674|GO:0006366|GO:0006367
g15463.t1	255	PF10545	Alcohol dehydrogenase transcription factor Myb/SANT-like	3	44	4.4e-06	IPR006578	MADF domain
g15463.t1	255	PF02944	BESS motif	129	163	5.5e-07	IPR004210	BESS motif	GO:0003677
g24810.t1	2775	PF12775	P-loop containing dynein motor region D3	683	949	3.5e-49
g24810.t1	2775	PF07728	AAA domain (dynein-related subfamily)	367	510	1.3e-05	IPR011704	ATPase, dynein-related, AAA domain	GO:0005524|GO:0016887
g24810.t1	2775	PF12774	Hydrolytic ATP binding site of dynein motor region D1	70	282	2.7e-68
g24810.t1	2775	PF03028	Dynein heavy chain and region D6 of dynein motor	2045	2770	8.5e-227	IPR004273	Dynein heavy chain domain	GO:0003777|GO:0007018|GO:0030286
g24810.t1	2775	PF12780	P-loop containing dynein motor region D4	1041	1304	4.6e-64	IPR024317	Dynein heavy chain, P-loop containing D4 domain
g24810.t1	2775	PF12777	Microtubule-binding stalk of dynein motor	1320	1646	1.1e-51	IPR024743	Dynein heavy chain, coiled coil stalk
g24810.t1	2775	PF12781	ATP-binding dynein motor region D5	1679	1899	4.3e-73
g4269.t1	249	PF13279	Thioesterase-like superfamily	84	191	3.9e-26
g6831.t1	388	PF00022	Actin	11	380	3.4e-98	IPR004000	Actin family
g23834.t1	986	PF10996	Beta-Casp domain	243	368	4.9e-22	IPR022712	Beta-Casp domain
g23834.t1	986	PF13299	Cleavage and polyadenylation factor 2 C-terminal	545	674	3.3e-17	IPR025069	Cleavage and polyadenylation specificity factor 2, C-terminal
g23834.t1	986	PF16661	Metallo-beta-lactamase superfamily domain	22	190	9.1e-59	IPR001279	Metallo-beta-lactamase
g23834.t1	986	PF07542	ATP12 chaperone protein	735	852	2.2e-28	IPR011419	ATP12, ATP synthase F1-assembly protein	GO:0043461
g9144.t1	427	PF05920	Homeobox KN domain	302	341	3.2e-18	IPR008422	Homeobox KN domain	GO:0003677|GO:0006355
g9144.t1	427	PF16493	N-terminal of Homeobox Meis and PKNOX1	60	141	7.7e-36	IPR032453	Homeobox protein PKNOX/Meis, N-terminal
g23410.t1	681	PF00373	FERM central domain	284	575	4.3e-36	IPR019748	FERM central domain
g23410.t1	681	PF00169	PH domain	386	477	1.9e-07	IPR001849	Pleckstrin homology domain
g12684.t1	161	PF00075	RNase H	11	133	6.4e-09	IPR002156	Ribonuclease H domain	GO:0003676|GO:0004523
g12142.t1	91	PF05699	hAT family C-terminal dimerisation region	4	64	1.3e-08	IPR008906	HAT, C-terminal dimerisation domain	GO:0046983
g324.t1	106	PF13656	RNA polymerase Rpb3/Rpb11 dimerisation domain	19	90	9.9e-20	IPR009025	DNA-directed RNA polymerase, RBP11-like dimerisation domain	GO:0006351|GO:0046983
g21059.t1	272	PF02173	pKID domain	88	119	9.8e-11	IPR003102	Coactivator CBP, pKID	GO:0005515|GO:0006355
g21059.t1	272	PF00170	bZIP transcription factor	215	270	5.8e-18	IPR004827	Basic-leucine zipper domain	GO:0003700|GO:0006355|GO:0043565
g26205.t1	729	PF05649	Peptidase family M13	60	462	1.1e-79	IPR008753	Peptidase M13, N-terminal domain	GO:0006508
g26205.t1	729	PF01431	Peptidase family M13	523	728	1.2e-66	IPR018497	Peptidase M13, C-terminal domain	GO:0004222|GO:0006508
g24393.t1	370	PF02949	7tm Odorant receptor	70	353	6.5e-17	IPR004117	Olfactory receptor, insect	GO:0004984|GO:0005549|GO:0007608|GO:0016020
g18183.t1	227	PF03184	DDE superfamily endonuclease	22	201	6.1e-41	IPR004875	DDE superfamily endonuclease domain	GO:0003676
g27178.t3	723	PF00326	Prolyl oligopeptidase family	495	719	3.8e-25	IPR001375	Peptidase S9, prolyl oligopeptidase, catalytic domain	GO:0006508|GO:0008236
g15080.t1	176	PF00067	Cytochrome P450	1	145	2.1e-46	IPR001128	Cytochrome P450	GO:0005506|GO:0016705|GO:0020037|GO:0055114
g15.t1	262	PF10545	Alcohol dehydrogenase transcription factor Myb/SANT-like	15	101	6e-14	IPR006578	MADF domain
g12395.t1	657	PF14291	Domain of unknown function (DUF4371)	154	393	8.4e-32	IPR025398	Domain of unknown function DUF4371
g19583.t1	407	PF03088	Strictosidine synthase	168	254	3.8e-23	IPR018119	Strictosidine synthase, conserved region	GO:0009058|GO:0016844
g13235.t1	136	PF03184	DDE superfamily endonuclease	2	136	2.2e-34	IPR004875	DDE superfamily endonuclease domain	GO:0003676
g24488.t1	235	PF10218	Uncharacterized conserved protein (DUF2054)	110	228	1.9e-41	IPR019352	Uncharacterised protein family UPF0454
g25933.t1	770	PF04112	Mak10 subunit, NatC N(alpha)-terminal acetyltransferase	109	195	1.9e-21	IPR007244	NatC N(alpha)-terminal acetyltransferase, Mak10 subunit
g7292.t1	319	PF09606	ARC105 or Med15 subunit of Mediator complex non-fungal	1	306	1e-88	IPR019087	Mediator of RNA polymerase II transcription subunit 15	GO:0001104|GO:0006357|GO:0016592
g278.t1	533	PF10255	RNA polymerase I-associated factor PAF67	116	520	1e-161	IPR019382	Translation initiation factor 3 complex subunit L	GO:0003743|GO:0005737|GO:0005852
g21339.t1	1099	PF00008	EGF-like domain	709	739	0.00015	IPR000742	EGF-like domain	GO:0005515
g21339.t1	1099	PF02010	REJ domain	1017	1067	6e-06	IPR002859	PKD/REJ-like domain
g21339.t1	1099	PF00005	ABC transporter	36	170	1e-25	IPR003439	ABC transporter-like	GO:0005524|GO:0016887
g21339.t1	1099	PF12698	ABC-2 family transporter protein	299	648	7.3e-26
g10222.t1	357	PF04218	CENP-B N-terminal DNA-binding domain	305	353	1.8e-08	IPR007889	DNA binding HTH domain, Psq-type	GO:0003677
g27396.t1	276	PF01607	Chitin binding Peritrophin-A domain	219	268	2.7e-06	IPR002557	Chitin binding domain	GO:0005576|GO:0006030|GO:0008061
g3977.t2	801	PF00397	WW domain	265	294	1.8e-06	IPR001202	WW domain	GO:0005515
g3977.t2	801	PF00397	WW domain	311	340	1.6e-09	IPR001202	WW domain	GO:0005515
g3977.t2	801	PF00397	WW domain	159	188	4.4e-14	IPR001202	WW domain	GO:0005515
g3977.t2	801	PF00632	HECT-domain (ubiquitin-transferase)	491	800	4.3e-99	IPR000569	HECT domain	GO:0004842
g3977.t2	801	PF00168	C2 domain	15	112	4.6e-11	IPR000008	C2 domain	GO:0005515
g6628.t1	1536	PF05712	MRG	1365	1519	5.2e-09	IPR026541	MRG domain
g16938.t1	147	PF05699	hAT family C-terminal dimerisation region	62	120	1.4e-05	IPR008906	HAT, C-terminal dimerisation domain	GO:0046983
g16552.t1	290	PF00201	UDP-glucoronosyl and UDP-glucosyl transferase	43	282	2.9e-09	IPR002213	UDP-glucuronosyl/UDP-glucosyltransferase	GO:0008152|GO:0016758
g18350.t1	267	PF14529	Endonuclease-reverse transcriptase	108	215	8.3e-17	IPR005135	Endonuclease/exonuclease/phosphatase
g26073.t1	466	PF00155	Aminotransferase class I and II	74	454	3.5e-48	IPR004839	Aminotransferase, class I/classII	GO:0009058|GO:0030170
g2736.t1	671	PF02770	Acyl-CoA dehydrogenase, middle domain	151	260	9.4e-13	IPR006091	Acyl-CoA oxidase/dehydrogenase, central domain	GO:0003995|GO:0055114
g2736.t1	671	PF01756	Acyl-CoA oxidase	489	668	1.5e-53	IPR002655	Acyl-CoA oxidase, C-terminal	GO:0003997|GO:0005777|GO:0006635|GO:0055114
g2736.t1	671	PF14749	Acyl-coenzyme A oxidase N-terminal	21	144	2e-33	IPR029320	Acyl-coenzyme A oxidase, N-terminal
g25321.t1	356	PF06468	Spondin_N	14	180	1.8e-50	IPR009465	Spondin, N-terminal
g25321.t1	356	PF00090	Thrombospondin type 1 domain	300	348	1.1e-07	IPR000884	Thrombospondin type-1 (TSP1) repeat
g8885.t1	610	PF08156	NOP5NT (NUC127) domain	2	66	3.5e-20	IPR012974	NOP5, N-terminal
g8885.t1	610	PF01798	snoRNA binding domain, fibrillarin	167	396	4.2e-79	IPR002687	Nop domain
g753.t2	1217	PF08703	PLC-beta C terminal	1051	1204	1.1e-13	IPR014815	Phospholipase C-beta, C-terminal domain	GO:0004435|GO:0005509|GO:0016042
g753.t2	1217	PF09279	Phosphoinositide-specific phospholipase C, efhand-like	221	319	4.4e-15	IPR015359	Phosphoinositide-specific phospholipase C, EF-hand-like domain
g753.t2	1217	PF00388	Phosphatidylinositol-specific phospholipase C, X domain	330	477	6.2e-60	IPR000909	Phosphatidylinositol-specific phospholipase C, X domain
g753.t2	1217	PF00387	Phosphatidylinositol-specific phospholipase C, Y domain	573	687	4.9e-42	IPR001711	Phospholipase C, phosphatidylinositol-specific, Y domain	GO:0004435|GO:0006629|GO:0007165|GO:0035556
g15886.t1	245	PF02944	BESS motif	129	161	9.8e-05	IPR004210	BESS motif	GO:0003677
g13398.t1	847	PF14529	Endonuclease-reverse transcriptase	340	455	1.4e-14	IPR005135	Endonuclease/exonuclease/phosphatase
g13398.t1	847	PF00078	Reverse transcriptase (RNA-dependent DNA polymerase)	730	846	8.3e-23	IPR000477	Reverse transcriptase domain
g1807.t1	198	PF14681	Uracil phosphoribosyltransferase	8	182	1.2e-48	IPR029057	Phosphoribosyltransferase-like
g9371.t1	921	PF05485	THAP domain	96	180	3.7e-08	IPR006612	Zinc finger, C2CH-type	GO:0003676
g9371.t1	921	PF05485	THAP domain	214	290	1e-12	IPR006612	Zinc finger, C2CH-type	GO:0003676
g11469.t1	329	PF05699	hAT family C-terminal dimerisation region	249	306	4.3e-12	IPR008906	HAT, C-terminal dimerisation domain	GO:0046983
g9262.t1	304	PF13843	Transposase IS4	146	204	2.4e-08	IPR029526	PiggyBac transposable element-derived protein
g2529.t1	433	PF00795	Carbon-nitrogen hydrolase	4	259	9.8e-61	IPR003010	Carbon-nitrogen hydrolase	GO:0006807|GO:0016810
g2529.t1	433	PF01230	HIT domain	303	393	1.3e-23	IPR001310	Histidine triad (HIT) protein
g15936.t1	309	PF03732	Retrotransposon gag protein	88	173	2e-06	IPR005162	Retrotransposon gag domain
g3788.t1	1329	PF05729	NACHT domain	471	630	1.6e-08
g3788.t1	1329	PF00400	WD domain, G-beta repeat	1197	1238	0.00078	IPR001680	WD40 repeat	GO:0005515
g3788.t1	1329	PF00400	WD domain, G-beta repeat	1127	1193	0.092	IPR001680	WD40 repeat	GO:0005515
g6861.t1	126	PF02597	ThiS family	49	126	2.5e-09	IPR003749	ThiamineS/Molybdopterin converting factor subunit 1
g11400.t1	100	PF13842	DDE_Tnp_1-like zinc-ribbon	50	78	5.4e-06	IPR032718	PiggyBac transposable element-derived protein 4, C-terminal zinc-ribbon
g22052.t1	184	PF00186	Dihydrofolate reductase	10	183	5.4e-40	IPR001796	Dihydrofolate reductase domain	GO:0004146|GO:0006545|GO:0009165|GO:0055114
g21782.t1	475	PF01591	6-phosphofructo-2-kinase	25	236	6.8e-86	IPR013079	6-phosphofructo-2-kinase	GO:0003873|GO:0005524|GO:0006000
g21782.t1	475	PF00300	Histidine phosphatase superfamily (branch 1)	240	424	6.6e-41	IPR013078	Histidine phosphatase superfamily, clade-1
g5981.t1	1074	PF00443	Ubiquitin carboxyl-terminal hydrolase	78	408	6e-39	IPR001394	Peptidase C19, ubiquitin carboxyl-terminal hydrolase	GO:0016579|GO:0036459
g786.t1	255	PF00329	Respiratory-chain NADH dehydrogenase, 30 Kd subunit	79	199	5.1e-45	IPR001268	NADH:ubiquinone oxidoreductase, 30kDa subunit	GO:0008137|GO:0055114
g23701.t1	1158	PF02854	MIF4G domain	115	298	4.2e-08	IPR003890	MIF4G-like, type 3	GO:0003723|GO:0005515
g23701.t1	1158	PF02854	MIF4G domain	679	883	1.9e-24	IPR003890	MIF4G-like, type 3	GO:0003723|GO:0005515
g23701.t1	1158	PF02854	MIF4G domain	474	656	1.7e-17	IPR003890	MIF4G-like, type 3	GO:0003723|GO:0005515
g23701.t1	1158	PF04050	Up-frameshift suppressor 2	965	1079	1.5e-24	IPR007193	Up-frameshift suppressor 2
g23681.t1	361	PF02779	Transketolase, pyrimidine binding domain	34	209	7.2e-47	IPR005475	Transketolase-like, pyrimidine-binding domain
g23681.t1	361	PF02780	Transketolase, C-terminal domain	228	351	4.6e-36	IPR033248	Transketolase, C-terminal domain
g11856.t1	111	PF16087	Domain of unknown function (DUF4817)	5	47	3.4e-08	IPR032135	Protein of unknown function DUF4817
g14964.t1	268	PF14529	Endonuclease-reverse transcriptase	80	200	4.7e-25	IPR005135	Endonuclease/exonuclease/phosphatase
g15129.t1	358	PF03175	DNA polymerase type B, organellar and viral	104	260	3.6e-09	IPR004868	DNA-directed DNA polymerase, family B, mitochondria/virus	GO:0000166|GO:0003677|GO:0003887|GO:0006260|GO:0008408
g22763.t1	1078	PF00625	Guanylate kinase	820	999	1.2e-45	IPR008145	Guanylate kinase/L-type calcium channel beta subunit
g22763.t1	1078	PF07653	Variant SH3 domain	679	740	1.2e-10	IPR011511	Variant SH3 domain
g22763.t1	1078	PF00595	PDZ domain (Also known as DHR or GLGF)	583	636	2.7e-10	IPR001478	PDZ domain	GO:0005515
g22622.t2	1258	PF12125	D domain of beta-TrCP	783	820	1.3e-23	IPR021977	D domain of beta-TrCP	GO:0046983
g22622.t2	1258	PF00405	Transferrin	47	310	9.1e-20	IPR001156	Transferrin-like domain
g22622.t2	1258	PF00405	Transferrin	374	566	2.8e-07	IPR001156	Transferrin-like domain
g22622.t2	1258	PF12937	F-box-like	835	871	6.3e-08	IPR001810	F-box domain	GO:0005515
g22622.t2	1258	PF00400	WD domain, G-beta repeat	1189	1223	0.26	IPR001680	WD40 repeat	GO:0005515
g22622.t2	1258	PF00400	WD domain, G-beta repeat	976	1011	2.3e-06	IPR001680	WD40 repeat	GO:0005515
g22622.t2	1258	PF00400	WD domain, G-beta repeat	946	971	0.035	IPR001680	WD40 repeat	GO:0005515
g22622.t2	1258	PF00400	WD domain, G-beta repeat	1138	1174	2.2e-05	IPR001680	WD40 repeat	GO:0005515
g22622.t2	1258	PF00400	WD domain, G-beta repeat	1061	1094	0.0014	IPR001680	WD40 repeat	GO:0005515
g22622.t2	1258	PF00400	WD domain, G-beta repeat	1100	1134	0.00012	IPR001680	WD40 repeat	GO:0005515
g21159.t1	1603	PF08783	DWNN domain	3	76	4.6e-31	IPR014891	DWNN domain	GO:0005634|GO:0008270
g21159.t1	1603	PF13696	Zinc knuckle	158	178	1.3e-08	IPR025829	Zinc knuckle CX2CX3GHX4C
g5657.t1	381	PF13894	C2H2-type zinc finger	300	322	0.0014
g5657.t1	381	PF00096	Zinc finger, C2H2 type	356	379	1.7e-05	IPR007087	Zinc finger, C2H2	GO:0046872
g5657.t1	381	PF12874	Zinc-finger of C2H2 type	244	266	0.0018
g5657.t1	381	PF12874	Zinc-finger of C2H2 type	217	234	0.00073
g12390.t1	480	PF14291	Domain of unknown function (DUF4371)	4	209	1.8e-32	IPR025398	Domain of unknown function DUF4371
g22477.t1	279	PF10294	Lysine methyltransferase	82	226	2.3e-16	IPR019410	Lysine methyltransferase
g21301.t6	1393	PF13927	Immunoglobulin domain	68	152	6.6e-13
g21301.t6	1393	PF07679	Immunoglobulin I-set domain	170	265	8.4e-12	IPR013098	Immunoglobulin I-set
g21301.t6	1393	PF07679	Immunoglobulin I-set domain	683	758	2.3e-13	IPR013098	Immunoglobulin I-set
g21301.t6	1393	PF12355	Down syndrome cell adhesion molecule C terminal	1246	1366	2.8e-28	IPR021012	Down syndrome cell adhesion molecule, C-terminal
g21301.t6	1393	PF00041	Fibronectin type III domain	862	940	3.5e-07	IPR003961	Fibronectin type III	GO:0005515
g21301.t6	1393	PF00041	Fibronectin type III domain	272	356	1.6e-14	IPR003961	Fibronectin type III	GO:0005515
g21301.t6	1393	PF00041	Fibronectin type III domain	477	560	4.3e-10	IPR003961	Fibronectin type III	GO:0005515
g21301.t6	1393	PF00041	Fibronectin type III domain	371	462	1.4e-14	IPR003961	Fibronectin type III	GO:0005515
g21301.t6	1393	PF00041	Fibronectin type III domain	769	847	1.2e-08	IPR003961	Fibronectin type III	GO:0005515
g21301.t6	1393	PF00041	Fibronectin type III domain	577	661	3.5e-12	IPR003961	Fibronectin type III	GO:0005515
g22623.t1	382	PF00762	Ferrochelatase	25	346	8.3e-101	IPR001015	Ferrochelatase	GO:0004325|GO:0006783
g25203.t1	915	PF16487	Mid domain of argonaute	485	565	4e-33	IPR032473	Protein argonaute, Mid domain
g25203.t1	915	PF16488	Argonaute linker 2 domain	417	463	3.2e-16	IPR032472	Argonaute linker 2 domain
g25203.t1	915	PF02170	PAZ domain	276	408	1e-26	IPR003100	PAZ domain	GO:0005515
g25203.t1	915	PF16486	N-terminal domain of argonaute	80	209	3.6e-27	IPR032474	Protein argonaute, N-terminal
g25203.t1	915	PF02171	Piwi domain	573	873	5.4e-113	IPR003165	Piwi domain	GO:0003676
g25203.t1	915	PF08699	Argonaute linker 1 domain	219	269	1e-23	IPR014811	Argonaute, linker 1 domain
g33.t1	1165	PF16794	Fibronectin-III type domain	1062	1159	2e-11	IPR003961	Fibronectin type III	GO:0005515
g18170.t1	230	PF03732	Retrotransposon gag protein	6	61	6.6e-05	IPR005162	Retrotransposon gag domain
g18170.t1	230	PF00098	Zinc knuckle	123	138	0.0003	IPR001878	Zinc finger, CCHC-type	GO:0003676|GO:0008270
g18170.t1	230	PF00098	Zinc knuckle	165	181	0.0012	IPR001878	Zinc finger, CCHC-type	GO:0003676|GO:0008270
g13014.t1	201	PF00538	linker histone H1 and H5 family	38	109	3.4e-28	IPR005818	Linker histone H1/H5, domain H15	GO:0000786|GO:0003677|GO:0005634|GO:0006334
g24030.t1	814	PF00627	UBA/TS-N domain	627	662	2.2e-06	IPR015940	Ubiquitin-associated domain
g24030.t1	814	PF00627	UBA/TS-N domain	688	724	3.3e-11	IPR015940	Ubiquitin-associated domain
g24030.t1	814	PF00443	Ubiquitin carboxyl-terminal hydrolase	331	805	5e-46	IPR001394	Peptidase C19, ubiquitin carboxyl-terminal hydrolase	GO:0016579|GO:0036459
g24030.t1	814	PF02148	Zn-finger in ubiquitin-hydrolases and other protein	204	276	1.6e-15	IPR001607	Zinc finger, UBP-type	GO:0008270
g4338.t1	1248	PF13855	Leucine rich repeat	156	200	4.2e-08	IPR001611	Leucine-rich repeat	GO:0005515
g4338.t1	1248	PF13855	Leucine rich repeat	291	352	2.8e-12	IPR001611	Leucine-rich repeat	GO:0005515
g4338.t1	1248	PF13855	Leucine rich repeat	849	908	2.3e-14	IPR001611	Leucine-rich repeat	GO:0005515
g4338.t1	1248	PF13855	Leucine rich repeat	622	665	4.3e-07	IPR001611	Leucine-rich repeat	GO:0005515
g4338.t1	1248	PF13855	Leucine rich repeat	219	278	4.5e-14	IPR001611	Leucine-rich repeat	GO:0005515
g4338.t1	1248	PF13855	Leucine rich repeat	391	448	4.9e-15	IPR001611	Leucine-rich repeat	GO:0005515
g4338.t1	1248	PF13855	Leucine rich repeat	459	519	2.5e-11	IPR001611	Leucine-rich repeat	GO:0005515
g4338.t1	1248	PF01582	TIR domain	1078	1178	4.7e-19	IPR000157	Toll/interleukin-1 receptor homology (TIR) domain	GO:0005515|GO:0007165
g8373.t1	866	PF00488	MutS domain V	627	812	1.8e-79	IPR000432	DNA mismatch repair protein MutS, C-terminal	GO:0005524|GO:0006298|GO:0030983
g8373.t1	866	PF01624	MutS domain I	6	80	6.4e-10	IPR007695	DNA mismatch repair protein MutS-like, N-terminal	GO:0005524|GO:0006298|GO:0030983
g8373.t1	866	PF05192	MutS domain III	275	570	2.3e-35	IPR007696	DNA mismatch repair protein MutS, core	GO:0005524|GO:0006298|GO:0030983
g8373.t1	866	PF05188	MutS domain II	119	257	5.4e-15	IPR007860	DNA mismatch repair protein MutS, connector domain	GO:0005524|GO:0006298|GO:0030983
g8373.t1	866	PF05190	MutS family domain IV	437	529	2.1e-14	IPR007861	DNA mismatch repair protein MutS, clamp	GO:0005524|GO:0006298|GO:0030983
g7074.t1	956	PF17215	S1 domain	830	905	4.7e-06	IPR033770	Exosome complex exonuclease RRP44, S1 domain
g7074.t1	956	PF00773	RNB domain	449	776	4.8e-98
g7074.t1	956	PF13638	PIN domain	68	189	1.4e-13	IPR002716	PIN domain
g7074.t1	956	PF17216	Rrp44-like cold shock domain	221	310	7.9e-16	IPR033771	Rrp44-like cold shock domain
g8428.t1	1236	PF16124	RecQ zinc-binding	785	856	1.1e-16	IPR032284	ATP-dependent DNA helicase RecQ, zinc-binding domain
g8428.t1	1236	PF00271	Helicase conserved C-terminal domain	666	773	1.7e-16	IPR001650	Helicase, C-terminal
g8428.t1	1236	PF00270	DEAD/DEAH box helicase	461	627	2.2e-19	IPR011545	DEAD/DEAH box helicase domain	GO:0003676|GO:0005524
g8428.t1	1236	PF09382	RQC domain	863	983	1.5e-22	IPR018982	RQC domain	GO:0006260|GO:0006281|GO:0043140
g8428.t1	1236	PF00570	HRDC domain	1007	1073	4.4e-14	IPR002121	HRDC domain	GO:0003676|GO:0005622
g9514.t1	418	PF00022	Actin	7	234	1.6e-58	IPR004000	Actin family
g5164.t1	272	PF13424	Tetratricopeptide repeat	186	248	1.6e-08
g5164.t1	272	PF13432	Tetratricopeptide repeat	83	145	3.8e-08
g5164.t1	272	PF13414	TPR repeat	5	40	2.5e-07	IPR011990	Tetratricopeptide-like helical domain	GO:0005515
g5951.t1	605	PF07707	BTB And C-terminal Kelch	157	252	3.6e-28	IPR011705	BTB/Kelch-associated
g5951.t1	605	PF01344	Kelch motif	443	487	2e-16	IPR006652	Kelch repeat type 1	GO:0005515
g5951.t1	605	PF01344	Kelch motif	537	575	3.8e-11	IPR006652	Kelch repeat type 1	GO:0005515
g5951.t1	605	PF01344	Kelch motif	397	439	4.3e-10	IPR006652	Kelch repeat type 1	GO:0005515
g5951.t1	605	PF01344	Kelch motif	490	533	2.3e-09	IPR006652	Kelch repeat type 1	GO:0005515
g5951.t1	605	PF00651	BTB/POZ domain	45	149	1.4e-26	IPR000210	BTB/POZ domain	GO:0005515
g10376.t1	66	PF14949	ARF7 effector protein C-terminus	15	52	2.2e-16	IPR029264	ARF7 effector protein, C-terminal
g18905.t1	165	PF14291	Domain of unknown function (DUF4371)	5	164	1.4e-14	IPR025398	Domain of unknown function DUF4371
g19354.t1	664	PF02995	Protein of unknown function (DUF229)	126	589	4.4e-118	IPR004245	Protein of unknown function DUF229
g15543.t1	273	PF13843	Transposase IS4	156	271	1.7e-24	IPR029526	PiggyBac transposable element-derived protein
g7316.t2	222	PF00664	ABC transporter transmembrane region	1	88	1.8e-05	IPR011527	ABC transporter type 1, transmembrane domain	GO:0005524|GO:0006810|GO:0016021|GO:0042626|GO:0055085
g14918.t1	108	PF00083	Sugar (and other) transporter	17	104	7e-11	IPR005828	Major facilitator, sugar transporter-like	GO:0016021|GO:0022857|GO:0055085
g7104.t1	218	PF00098	Zinc knuckle	149	165	0.00087	IPR001878	Zinc finger, CCHC-type	GO:0003676|GO:0008270
g22675.t1	725	PF01432	Peptidase family M3	268	718	1.4e-96	IPR001567	Peptidase M3A/M3B catalytic domain	GO:0004222|GO:0006508
g27378.t1	396	PF01926	50S ribosome-binding GTPase	172	301	1.1e-24	IPR006073	GTP binding domain	GO:0005525
g27378.t1	396	PF01018	GTP1/OBG	39	149	1.1e-18	IPR006169	GTP1/OBG domain
g21534.t1	1868	PF14641	Helix-turn-helix DNA-binding domain of SPT6	367	474	1.4e-19	IPR028088	Helix-turn-helix DNA-binding domain of Spt6	GO:0003677
g21534.t1	1868	PF14639	Holliday-junction resolvase-like of SPT6	837	990	7.6e-34	IPR028231	Transcription elongation factor Spt6, YqgF domain
g21534.t1	1868	PF14635	Helix-hairpin-helix motif	995	1097	6.9e-38	IPR032706	Transcription elongation factor Spt6, helix-hairpin-helix motif
g21534.t1	1868	PF14633	SH2 domain	1359	1573	9.2e-83	IPR000980	SH2 domain
g21534.t1	1868	PF14878	Death-like domain of SPT6	1110	1216	3.8e-36	IPR027999	Death-like domain of Spt6
g21534.t1	1868	PF00575	S1 RNA binding domain	1285	1334	7.2e-06	IPR003029	S1 domain	GO:0003676
g21534.t1	1868	PF14632	Acidic N-terminal SPT6	92	174	1.5e-12	IPR028083	Spt6 acidic, N-terminal domain
g6496.t1	605	PF02733	Dak1 domain	47	356	3.3e-82	IPR004006	DhaK domain	GO:0004371|GO:0006071
g6496.t1	605	PF02734	DAK2 domain	426	597	1.8e-35	IPR004007	DhaL domain	GO:0004371|GO:0006071
g22852.t1	436	PF07690	Major Facilitator Superfamily	55	382	5.3e-25	IPR011701	Major facilitator superfamily	GO:0016021|GO:0055085
g24831.t1	548	PF12756	C2H2 type zinc-finger (2 copies)	337	436	2e-27	IPR015880	Zinc finger, C2H2-like
g24831.t1	548	PF12171	Zinc-finger double-stranded RNA-binding	251	276	3.7e-07	IPR022755	Zinc finger, double-stranded RNA binding
g1687.t1	163	PF01248	Ribosomal protein L7Ae/L30e/S12e/Gadd45 family	74	124	1.3e-08	IPR004038	Ribosomal protein L7Ae/L30e/S12e/Gadd45
g1254.t1	1417	PF00609	Diacylglycerol kinase accessory domain	985	1141	1.1e-51	IPR000756	Diacylglycerol kinase, accessory domain	GO:0004143|GO:0007205
g1254.t1	1417	PF07647	SAM domain (Sterile alpha motif)	1367	1398	0.00012	IPR001660	Sterile alpha motif domain	GO:0005515
g1254.t1	1417	PF00130	Phorbol esters/diacylglycerol binding domain (C1 domain)	33	83	1.8e-08	IPR002219	Protein kinase C-like, phorbol ester/diacylglycerol-binding domain	GO:0035556
g1254.t1	1417	PF00130	Phorbol esters/diacylglycerol binding domain (C1 domain)	106	158	3.1e-10	IPR002219	Protein kinase C-like, phorbol ester/diacylglycerol-binding domain	GO:0035556
g1254.t1	1417	PF00781	Diacylglycerol kinase catalytic domain	190	295	6.2e-24	IPR001206	Diacylglycerol kinase, catalytic domain	GO:0016301
g27484.t1	1350	PF12348	CLASP N terminal	63	205	2.6e-11	IPR024395	CLASP N-terminal domain
g27484.t1	1350	PF12348	CLASP N terminal	325	541	7.4e-38	IPR024395	CLASP N-terminal domain
g1713.t1	3839	PF03028	Dynein heavy chain and region D6 of dynein motor	3117	3835	3.3e-260	IPR004273	Dynein heavy chain domain	GO:0003777|GO:0007018|GO:0030286
g1713.t1	3839	PF12777	Microtubule-binding stalk of dynein motor	2384	2729	2.6e-44	IPR024743	Dynein heavy chain, coiled coil stalk
g1713.t1	3839	PF08393	Dynein heavy chain, N-terminal region 2	580	981	2.6e-140	IPR013602	Dynein heavy chain, domain-2
g1713.t1	3839	PF12781	ATP-binding dynein motor region D5	2758	2979	2.3e-86
g1713.t1	3839	PF12774	Hydrolytic ATP binding site of dynein motor region D1	1107	1333	6.6e-90
g1713.t1	3839	PF12780	P-loop containing dynein motor region D4	2110	2370	2.7e-61	IPR024317	Dynein heavy chain, P-loop containing D4 domain
g1713.t1	3839	PF12775	P-loop containing dynein motor region D3	1741	2010	2.1e-51
g25155.t1	568	PF00651	BTB/POZ domain	15	120	1.9e-30	IPR000210	BTB/POZ domain	GO:0005515
g25155.t1	568	PF01344	Kelch motif	456	501	5.8e-13	IPR006652	Kelch repeat type 1	GO:0005515
g25155.t1	568	PF01344	Kelch motif	408	453	8.8e-10	IPR006652	Kelch repeat type 1	GO:0005515
g25155.t1	568	PF01344	Kelch motif	314	357	9.6e-12	IPR006652	Kelch repeat type 1	GO:0005515
g25155.t1	568	PF01344	Kelch motif	505	557	4.5e-07	IPR006652	Kelch repeat type 1	GO:0005515
g25155.t1	568	PF01344	Kelch motif	360	403	2.4e-09	IPR006652	Kelch repeat type 1	GO:0005515
g25155.t1	568	PF07707	BTB And C-terminal Kelch	128	227	7.7e-29	IPR011705	BTB/Kelch-associated
g305.t1	436	PF00928	Adaptor complexes medium subunit family	158	436	6.6e-77	IPR028565	Mu homology domain
g305.t1	436	PF01217	Clathrin adaptor complex small chain	2	124	1.3e-06	IPR022775	AP complex, mu/sigma subunit
g9986.t1	289	PF05485	THAP domain	5	72	1.7e-10	IPR006612	Zinc finger, C2CH-type	GO:0003676
g21162.t1	633	PF01740	STAS domain	473	567	9.5e-06	IPR002645	STAS domain
g21162.t1	633	PF00916	Sulfate permease family	51	433	7.9e-80	IPR011547	SLC26A/SulP transporter domain	GO:0008272|GO:0015116|GO:0016021
g16049.t1	191	PF00749	tRNA synthetases class I (E and Q), catalytic domain	75	189	6.5e-42	IPR020058	Glutamyl/glutaminyl-tRNA synthetase, class Ib, catalytic domain	GO:0005524|GO:0016876|GO:0043039
g11840.t1	87	PF10545	Alcohol dehydrogenase transcription factor Myb/SANT-like	12	48	9.2e-06	IPR006578	MADF domain
g20161.t1	565	PF00069	Protein kinase domain	189	461	1.3e-64	IPR000719	Protein kinase domain	GO:0004672|GO:0005524|GO:0006468
g3341.t1	1217	PF09380	FERM C-terminal PH-like domain	256	335	1.5e-12	IPR018980	FERM, C-terminal PH-like domain
g3341.t1	1217	PF00373	FERM central domain	125	226	1.4e-10	IPR019748	FERM central domain
g8308.t1	215	PF03221	Tc5 transposase DNA-binding domain	41	103	2.4e-16	IPR006600	HTH CenpB-type DNA-binding domain
g8308.t1	215	PF03184	DDE superfamily endonuclease	167	213	1e-07	IPR004875	DDE superfamily endonuclease domain	GO:0003676
g9569.t1	313	PF05699	hAT family C-terminal dimerisation region	5	58	1.5e-05	IPR008906	HAT, C-terminal dimerisation domain	GO:0046983
g25896.t1	436	PF00928	Adaptor complexes medium subunit family	158	436	7e-77	IPR028565	Mu homology domain
g25896.t1	436	PF01217	Clathrin adaptor complex small chain	2	124	1.4e-06	IPR022775	AP complex, mu/sigma subunit
g1110.t1	1102	PF04564	U-box domain	1022	1092	4.5e-26	IPR003613	U box domain	GO:0004842|GO:0016567
g1110.t1	1102	PF10408	Ubiquitin elongating factor core	388	1004	7.9e-187	IPR019474	Ubiquitin conjugation factor E4, core	GO:0000151|GO:0006511|GO:0016567|GO:0034450
g7852.t1	821	PF14291	Domain of unknown function (DUF4371)	211	422	1.6e-23	IPR025398	Domain of unknown function DUF4371
g7581.t1	523	PF00675	Insulinase (Peptidase family M16)	76	225	7.5e-29	IPR011765	Peptidase M16, N-terminal
g7581.t1	523	PF05193	Peptidase M16 inactive domain	231	432	1.1e-32	IPR007863	Peptidase M16, C-terminal
g20315.t1	486	PF01409	tRNA synthetases class II core domain (F)	201	472	1.2e-91	IPR002319	Phenylalanyl-tRNA synthetase	GO:0000049|GO:0004812|GO:0005524|GO:0005737|GO:0043039
g11914.t1	108	PF01344	Kelch motif	23	67	7.4e-13	IPR006652	Kelch repeat type 1	GO:0005515
g11914.t1	108	PF01344	Kelch motif	70	108	1.8e-10	IPR006652	Kelch repeat type 1	GO:0005515
g12111.t1	451	PF00098	Zinc knuckle	406	421	0.00015	IPR001878	Zinc finger, CCHC-type	GO:0003676|GO:0008270
g2056.t1	839	PF07780	Spb1 C-terminal domain	588	818	1.8e-64	IPR012920	Ribosomal RNA methyltransferase, Spb1, C-terminal	GO:0005634|GO:0006364|GO:0008168
g2056.t1	839	PF11861	Domain of unknown function (DUF3381)	234	381	4.9e-39	IPR024576	Ribosomal RNA methyltransferase Spb1, domain of unknown function DUF3381
g2056.t1	839	PF01728	FtsJ-like methyltransferase	24	199	6.8e-56	IPR002877	Ribosomal RNA methyltransferase FtsJ domain	GO:0008168|GO:0032259
g845.t2	4138	PF12777	Microtubule-binding stalk of dynein motor	2634	2973	6.5e-34	IPR024743	Dynein heavy chain, coiled coil stalk
g845.t2	4138	PF12781	ATP-binding dynein motor region D5	3003	3223	1.4e-78
g845.t2	4138	PF12775	P-loop containing dynein motor region D3	1990	2252	2.2e-45
g845.t2	4138	PF03028	Dynein heavy chain and region D6 of dynein motor	3939	4135	5.7e-60	IPR004273	Dynein heavy chain domain	GO:0003777|GO:0007018|GO:0030286
g845.t2	4138	PF03028	Dynein heavy chain and region D6 of dynein motor	3364	3856	1.1e-158	IPR004273	Dynein heavy chain domain	GO:0003777|GO:0007018|GO:0030286
g845.t2	4138	PF12774	Hydrolytic ATP binding site of dynein motor region D1	1371	1600	2.1e-84
g845.t2	4138	PF08393	Dynein heavy chain, N-terminal region 2	830	1234	3.9e-108	IPR013602	Dynein heavy chain, domain-2
g845.t2	4138	PF12780	P-loop containing dynein motor region D4	2352	2616	3.1e-63	IPR024317	Dynein heavy chain, P-loop containing D4 domain
g845.t2	4138	PF07728	AAA domain (dynein-related subfamily)	1687	1822	8.4e-09	IPR011704	ATPase, dynein-related, AAA domain	GO:0005524|GO:0016887
g845.t2	4138	PF08385	Dynein heavy chain, N-terminal region 1	4	334	3.7e-26	IPR013594	Dynein heavy chain, domain-1
g7225.t1	228	PF14291	Domain of unknown function (DUF4371)	45	196	3e-13	IPR025398	Domain of unknown function DUF4371
g16722.t1	89	PF10545	Alcohol dehydrogenase transcription factor Myb/SANT-like	9	70	2.8e-16	IPR006578	MADF domain
g11418.t1	421	PF03221	Tc5 transposase DNA-binding domain	62	125	7.2e-06	IPR006600	HTH CenpB-type DNA-binding domain
g11418.t1	421	PF05225	helix-turn-helix, Psq domain	13	46	1.6e-06	IPR007889	DNA binding HTH domain, Psq-type	GO:0003677
g11418.t1	421	PF03184	DDE superfamily endonuclease	205	367	3.4e-17	IPR004875	DDE superfamily endonuclease domain	GO:0003676
g23397.t1	131	PF01187	Macrophage migration inhibitory factor (MIF)	4	118	1.4e-13	IPR001398	Macrophage migration inhibitory factor
g8478.t1	147	PF10545	Alcohol dehydrogenase transcription factor Myb/SANT-like	44	114	6.7e-14	IPR006578	MADF domain
g22454.t1	568	PF00485	Phosphoribulokinase / Uridine kinase family	118	305	6.8e-62	IPR006083	Phosphoribulokinase/uridine kinase	GO:0005524|GO:0008152|GO:0016301
g22454.t1	568	PF14681	Uracil phosphoribosyltransferase	346	547	8e-70	IPR029057	Phosphoribosyltransferase-like
g23439.t1	205	PF13927	Immunoglobulin domain	88	161	6.8e-11
g23915.t1	99	PF10244	Mitochondrial ribosomal subunit	1	93	5.9e-43	IPR019373	Ribosomal protein L51, mitochondrial	GO:0003735
g13628.t1	486	PF00232	Glycosyl hydrolase family 1	68	479	2.1e-91	IPR001360	Glycoside hydrolase family 1	GO:0004553|GO:0005975
g2620.t1	416	PF00109	Beta-ketoacyl synthase, N-terminal domain	3	246	3.3e-56	IPR014030	Beta-ketoacyl synthase, N-terminal
g2620.t1	416	PF02801	Beta-ketoacyl synthase, C-terminal domain	254	368	2.1e-32	IPR014031	Beta-ketoacyl synthase, C-terminal
g24576.t3	1466	PF14598	PAS domain	348	457	4.8e-28
g24576.t3	1466	PF00989	PAS fold	177	233	7.4e-06	IPR013767	PAS fold	GO:0006355
g34.t1	452	PF02762	CBL proto-oncogene N-terminus, SH2-like domain	249	334	5.8e-45	IPR014742	Adaptor protein Cbl, SH2-like domain
g34.t1	452	PF02262	CBL proto-oncogene N-terminal domain 1	36	159	3.2e-52	IPR003153	Adaptor protein Cbl, N-terminal helical	GO:0004871|GO:0005634|GO:0007166
g34.t1	452	PF14447	Prokaryotic RING finger family 4	366	411	3.3e-13
g34.t1	452	PF02761	CBL proto-oncogene N-terminus, EF hand-like domain	164	247	8e-40	IPR014741	Adaptor protein Cbl, EF hand-like	GO:0005509
g25999.t1	620	PF05199	GMC oxidoreductase	466	609	7.3e-42	IPR007867	Glucose-methanol-choline oxidoreductase, C-terminal	GO:0016614|GO:0055114
g25999.t1	620	PF00732	GMC oxidoreductase	51	355	1.4e-81	IPR000172	Glucose-methanol-choline oxidoreductase, N-terminal	GO:0016614|GO:0050660|GO:0055114
g15435.t1	454	PF05699	hAT family C-terminal dimerisation region	343	431	2.5e-13	IPR008906	HAT, C-terminal dimerisation domain	GO:0046983
g15435.t1	454	PF14291	Domain of unknown function (DUF4371)	2	56	2.9e-08	IPR025398	Domain of unknown function DUF4371
g1351.t1	202	PF00379	Insect cuticle protein	130	182	5.1e-14	IPR000618	Insect cuticle protein	GO:0042302
g13385.t1	494	PF02037	SAP domain	7	40	8.9e-10	IPR003034	SAP domain
g13385.t1	494	PF03732	Retrotransposon gag protein	307	392	4.9e-09	IPR005162	Retrotransposon gag domain
g23164.t1	2379	PF12166	Piezo non-specific cation channel, R-Ras-binding domain	1942	2361	1.4e-132	IPR031334	Piezo non-specific cation channel, R-Ras-binding domain
g23164.t1	2379	PF15917	Piezo	1221	1352	1.1e-45	IPR031805	Piezo domain
g25916.t1	936	PF00060	Ligand-gated ion channel	554	862	1.4e-44	IPR001320	Ionotropic glutamate receptor	GO:0004970|GO:0016020
g25916.t1	936	PF10613	Ligated ion channel L-glutamate- and glycine-binding site	428	540	1.4e-37	IPR019594	Ionotropic glutamate receptor, L-glutamate and glycine-binding domain	GO:0004970|GO:0005234|GO:0016020
g2501.t1	771	PF00626	Gelsolin repeat	637	724	7.9e-16	IPR007123	Gelsolin-like domain
g2501.t1	771	PF08033	Sec23/Sec24 beta-sandwich domain	407	510	4.4e-31	IPR012990	Sec23/Sec24 beta-sandwich
g2501.t1	771	PF04811	Sec23/Sec24 trunk domain	127	395	2.2e-74	IPR006896	Sec23/Sec24, trunk domain	GO:0006886|GO:0006888|GO:0030127
g2501.t1	771	PF04815	Sec23/Sec24 helical domain	524	622	6.3e-29	IPR006900	Sec23/Sec24, helical domain	GO:0006886|GO:0006888|GO:0030127
g2501.t1	771	PF04810	Sec23/Sec24 zinc finger	58	98	4.9e-14	IPR006895	Zinc finger, Sec23/Sec24-type	GO:0006886|GO:0006888|GO:0008270|GO:0030127
g25490.t1	166	PF07679	Immunoglobulin I-set domain	9	94	1.5e-13	IPR013098	Immunoglobulin I-set
g25490.t1	166	PF13927	Immunoglobulin domain	110	156	6.2e-08
g20088.t1	3813	PF08393	Dynein heavy chain, N-terminal region 2	647	1049	2.5e-129	IPR013602	Dynein heavy chain, domain-2
g20088.t1	3813	PF12774	Hydrolytic ATP binding site of dynein motor region D1	1178	1405	4.4e-88
g20088.t1	3813	PF12781	ATP-binding dynein motor region D5	2818	3038	2.2e-82
g20088.t1	3813	PF03028	Dynein heavy chain and region D6 of dynein motor	3174	3765	9.2e-231	IPR004273	Dynein heavy chain domain	GO:0003777|GO:0007018|GO:0030286
g20088.t1	3813	PF12777	Microtubule-binding stalk of dynein motor	2444	2786	2.9e-47	IPR024743	Dynein heavy chain, coiled coil stalk
g20088.t1	3813	PF12775	P-loop containing dynein motor region D3	2004	2067	2.9e-13
g20088.t1	3813	PF12775	P-loop containing dynein motor region D3	1832	1995	9.2e-27
g20088.t1	3813	PF12780	P-loop containing dynein motor region D4	2166	2431	6e-63	IPR024317	Dynein heavy chain, P-loop containing D4 domain
g25968.t1	1010	PF00690	Cation transporter/ATPase, N-terminus	41	91	2.2e-06	IPR004014	Cation-transporting P-type ATPase, N-terminal
g25968.t1	1010	PF13246	Cation transport ATPase (P-type)	468	509	5.4e-07
g25968.t1	1010	PF00122	E1-E2 ATPase	105	338	4e-38	IPR008250	P-type ATPase, A domain	GO:0000166|GO:0046872
g19153.t1	1647	PF00626	Gelsolin repeat	855	899	1.6e-05	IPR007123	Gelsolin-like domain
g19153.t1	1647	PF00626	Gelsolin repeat	1185	1274	1.6e-06	IPR007123	Gelsolin-like domain
g19153.t1	1647	PF02209	Villin headpiece domain	1612	1647	4.9e-12	IPR003128	Villin headpiece	GO:0003779|GO:0007010
g4417.t1	520	PF04055	Radical SAM superfamily	200	369	2.7e-17	IPR007197	Radical SAM	GO:0003824|GO:0051536
g4417.t1	520	PF01938	TRAM domain	424	482	7.3e-07	IPR002792	TRAM domain
g4417.t1	520	PF00919	Uncharacterized protein family UPF0004	56	136	1e-19	IPR013848	Methylthiotransferase, N-terminal	GO:0003824|GO:0009451|GO:0051539
g23700.t1	716	PF05178	KRI1-like family	264	348	1.5e-18	IPR018034	KRR1 interacting protein 1
g23700.t1	716	PF12936	KRI1-like family C-terminal	405	491	2.1e-24	IPR024626	Kri1-like, C-terminal
g15207.t1	168	PF12017	Transposase protein	1	103	1.6e-17	IPR021896	Transposase protein	GO:0004803|GO:0006313
g26862.t1	595	PF14781	Ciliary BBSome complex subunit 2, N-terminal	6	52	6.8e-16	IPR029430	Ciliary BBSome complex subunit 2, N-terminal
g26862.t1	595	PF14782	Ciliary BBSome complex subunit 2, C-terminal	167	590	4.3e-137	IPR029333	Ciliary BBSome complex subunit 2, C-terminal domain
g26862.t1	595	PF14783	Ciliary BBSome complex subunit 2, middle region	53	163	7.4e-40	IPR029429	Ciliary BBSome complex subunit 2, middle region
g23809.t1	624	PF13193	AMP-binding enzyme C-terminal domain	502	576	6e-06	IPR025110	AMP-binding enzyme C-terminal domain
g23809.t1	624	PF00501	AMP-binding enzyme	69	493	7.8e-64	IPR000873	AMP-dependent synthetase/ligase	GO:0003824|GO:0008152
g27116.t1	961	PF11838	ERAP1-like C-terminal domain	558	871	1.9e-55	IPR024571	ERAP1-like C-terminal domain
g27116.t1	961	PF01433	Peptidase family M1	153	413	8.2e-92	IPR014782	Peptidase M1, membrane alanine aminopeptidase, N-terminal	GO:0008237|GO:0008270
g23648.t1	3791	PF00094	von Willebrand factor type D domain	2936	3101	1.4e-18	IPR001846	von Willebrand factor, type D domain
g23648.t1	3791	PF00094	von Willebrand factor type D domain	374	517	1.2e-15	IPR001846	von Willebrand factor, type D domain
g23648.t1	3791	PF00094	von Willebrand factor type D domain	726	888	1.3e-27	IPR001846	von Willebrand factor, type D domain
g23648.t1	3791	PF00094	von Willebrand factor type D domain	1213	1357	1.2e-26	IPR001846	von Willebrand factor, type D domain
g23648.t1	3791	PF00094	von Willebrand factor type D domain	2611	2761	1.5e-15	IPR001846	von Willebrand factor, type D domain
g23648.t1	3791	PF01826	Trypsin Inhibitor like cysteine rich domain	2874	2931	8e-08	IPR002919	Trypsin Inhibitor-like, cysteine rich domain
g23648.t1	3791	PF01826	Trypsin Inhibitor like cysteine rich domain	1007	1061	2.8e-13	IPR002919	Trypsin Inhibitor-like, cysteine rich domain
g23648.t1	3791	PF01826	Trypsin Inhibitor like cysteine rich domain	631	686	1.5e-05	IPR002919	Trypsin Inhibitor-like, cysteine rich domain
g23648.t1	3791	PF01826	Trypsin Inhibitor like cysteine rich domain	1120	1173	2.4e-05	IPR002919	Trypsin Inhibitor-like, cysteine rich domain
g23648.t1	3791	PF01826	Trypsin Inhibitor like cysteine rich domain	3215	3272	4.3e-05	IPR002919	Trypsin Inhibitor-like, cysteine rich domain
g23648.t1	3791	PF00754	F5/8 type C domain	1964	2086	3e-16	IPR000421	Coagulation factor 5/8 C-terminal domain
g23648.t1	3791	PF00754	F5/8 type C domain	2132	2259	4.8e-22	IPR000421	Coagulation factor 5/8 C-terminal domain
g23648.t1	3791	PF08742	C8 domain	1400	1467	5.7e-18	IPR014853	Uncharacterised domain, cysteine-rich
g23648.t1	3791	PF08742	C8 domain	2798	2870	4.8e-07	IPR014853	Uncharacterised domain, cysteine-rich
g23648.t1	3791	PF08742	C8 domain	3148	3211	2.9e-14	IPR014853	Uncharacterised domain, cysteine-rich
g23648.t1	3791	PF08742	C8 domain	560	627	5.4e-07	IPR014853	Uncharacterised domain, cysteine-rich
g23648.t1	3791	PF08742	C8 domain	935	1000	3.3e-15	IPR014853	Uncharacterised domain, cysteine-rich
g21217.t1	170	PF02892	BED zinc finger	4	46	4.6e-05	IPR003656	Zinc finger, BED-type	GO:0003677
g2655.t1	690	PF00225	Kinesin motor domain	12	308	3.5e-104	IPR001752	Kinesin motor domain	GO:0003777|GO:0005524|GO:0007018|GO:0008017
g15491.t1	627	PF14291	Domain of unknown function (DUF4371)	124	341	1.7e-15	IPR025398	Domain of unknown function DUF4371
g18850.t1	149	PF00096	Zinc finger, C2H2 type	68	90	1.1e-05	IPR007087	Zinc finger, C2H2	GO:0046872
g18850.t1	149	PF00096	Zinc finger, C2H2 type	124	147	4.6e-06	IPR007087	Zinc finger, C2H2	GO:0046872
g18850.t1	149	PF12874	Zinc-finger of C2H2 type	40	58	0.064
g18850.t1	149	PF12874	Zinc-finger of C2H2 type	12	34	0.0005
g18850.t1	149	PF13894	C2H2-type zinc finger	96	118	0.00045
g27437.t1	337	PF00056	lactate/malate dehydrogenase, NAD binding domain	24	167	4.4e-41	IPR001236	Lactate/malate dehydrogenase, N-terminal	GO:0016491|GO:0055114
g27437.t1	337	PF02866	lactate/malate dehydrogenase, alpha/beta C-terminal domain	169	332	1.6e-50	IPR022383	Lactate/malate dehydrogenase, C-terminal	GO:0016616|GO:0055114
g27062.t1	396	PF01412	Putative GTPase activating protein for Arf	16	124	4.4e-26	IPR001164	Arf GTPase activating protein	GO:0005096
g27288.t1	470	PF14828	Amnionless	26	456	7.6e-74	IPR026112	Amnionless
g1391.t1	342	PF00106	short chain dehydrogenase	43	234	8e-48	IPR002347	Short-chain dehydrogenase/reductase SDR
g10927.t1	527	PF02036	SCP-2 sterol transfer family	421	512	8e-23	IPR003033	SCP2 sterol-binding domain
g10927.t1	527	PF02803	Thiolase, C-terminal domain	259	354	6.4e-11	IPR020617	Thiolase, C-terminal	GO:0008152|GO:0016747
g10927.t1	527	PF00108	Thiolase, N-terminal domain	5	216	5.3e-18	IPR020616	Thiolase, N-terminal	GO:0008152|GO:0016747
g27657.t1	890	PF08669	Glycine cleavage T-protein C-terminal barrel domain	751	829	3.7e-16	IPR013977	Glycine cleavage T-protein, C-terminal barrel domain
g27657.t1	890	PF01266	FAD dependent oxidoreductase	37	393	2.8e-52	IPR006076	FAD dependent oxidoreductase	GO:0016491|GO:0055114
g27657.t1	890	PF01571	Aminomethyltransferase folate-binding domain	454	741	8.3e-68	IPR006222	Glycine cleavage T-protein-like, N-terminal
g27657.t1	890	PF16350	FAD dependent oxidoreductase central domain	396	452	4.2e-19	IPR032503	FAD dependent oxidoreductase, central domain
g6738.t1	1764	PF07677	A-macroglobulin receptor	1490	1579	2.8e-19	IPR009048	Alpha-macroglobulin, receptor-binding	GO:0005576
g6738.t1	1764	PF07703	Alpha-2-macroglobulin family N-terminal region	541	667	1.7e-19	IPR011625	Alpha-2-macroglobulin, N-terminal 2
g6738.t1	1764	PF01835	MG2 domain	166	256	1.3e-12	IPR002890	Alpha-2-macroglobulin, N-terminal	GO:0004866
g6738.t1	1764	PF07678	A-macroglobulin complement component	1098	1374	4.4e-69	IPR011626	Alpha-macroglobulin complement component	GO:0005615
g6738.t1	1764	PF00207	Alpha-2-macroglobulin family	811	900	2.7e-18	IPR001599	Alpha-2-macroglobulin	GO:0004866
g2.t1	375	PF00462	Glutaredoxin	292	354	1.2e-16	IPR002109	Glutaredoxin	GO:0009055|GO:0015035|GO:0045454
g4767.t1	397	PF00069	Protein kinase domain	49	338	2.3e-61	IPR000719	Protein kinase domain	GO:0004672|GO:0005524|GO:0006468
g3258.t1	298	PF09606	ARC105 or Med15 subunit of Mediator complex non-fungal	15	242	9.1e-18	IPR019087	Mediator of RNA polymerase II transcription subunit 15	GO:0001104|GO:0006357|GO:0016592
g25397.t1	215	PF01105	emp24/gp25L/p24 family/GOLD	20	210	1e-48	IPR009038	GOLD domain	GO:0006810|GO:0016021
g3264.t1	371	PF00483	Nucleotidyl transferase	12	240	2.2e-54	IPR005835	Nucleotidyl transferase domain	GO:0009058|GO:0016779
g3264.t1	371	PF00132	Bacterial transferase hexapeptide (six repeats)	273	304	3.1e-08	IPR001451	Hexapeptide repeat
g10196.t1	211	PF13771	PHD-like zinc-binding domain	77	164	1.9e-16
g27371.t1	1127	PF09380	FERM C-terminal PH-like domain	226	315	1.5e-22	IPR018980	FERM, C-terminal PH-like domain
g27371.t1	1127	PF00373	FERM central domain	111	222	4.1e-21	IPR019748	FERM central domain
g27371.t1	1127	PF08736	FERM adjacent (FA)	322	361	2e-12	IPR014847	FERM adjacent (FA)
g27371.t1	1127	PF09379	FERM N-terminal domain	33	95	2.3e-17	IPR018979	FERM, N-terminal
g27371.t1	1127	PF05902	4.1 protein C-terminal domain (CTD)	1041	1124	9.5e-30	IPR008379	Band 4.1, C-terminal	GO:0003779|GO:0005198|GO:0005856
g4747.t1	416	PF00385	Chromo (CHRromatin Organisation MOdifier) domain	7	54	2e-13	IPR023780	Chromo domain
g4747.t1	416	PF17218	CBX family C-terminal motif	372	404	9.6e-13	IPR033773	CBX family C-terminal motif
g14154.t1	188	PF05699	hAT family C-terminal dimerisation region	103	161	4.9e-07	IPR008906	HAT, C-terminal dimerisation domain	GO:0046983
g4535.t1	325	PF00459	Inositol monophosphatase family	42	296	1.9e-40	IPR000760	Inositol monophosphatase-like	GO:0046854
g20593.t1	276	PF02019	WIF domain	46	183	2.6e-40	IPR003306	WIF domain
g24004.t1	1373	PF00005	ABC transporter	1126	1273	1.9e-29	IPR003439	ABC transporter-like	GO:0005524|GO:0016887
g24004.t1	1373	PF00005	ABC transporter	482	616	1.1e-21	IPR003439	ABC transporter-like	GO:0005524|GO:0016887
g24004.t1	1373	PF00664	ABC transporter transmembrane region	113	386	5.1e-32	IPR011527	ABC transporter type 1, transmembrane domain	GO:0005524|GO:0006810|GO:0016021|GO:0042626|GO:0055085
g24004.t1	1373	PF00664	ABC transporter transmembrane region	814	1038	2.3e-28	IPR011527	ABC transporter type 1, transmembrane domain	GO:0005524|GO:0006810|GO:0016021|GO:0042626|GO:0055085
g21199.t1	603	PF07521	Zn-dependent metallo-hydrolase RNA specificity domain	381	441	1.8e-18	IPR011108	Zn-dependent metallo-hydrolase, RNA specificity domain
g21199.t1	603	PF10996	Beta-Casp domain	248	365	5.6e-24	IPR022712	Beta-Casp domain
g21199.t1	603	PF16661	Metallo-beta-lactamase superfamily domain	24	197	1.1e-21	IPR001279	Metallo-beta-lactamase
g5550.t1	1310	PF12796	Ankyrin repeats (3 copies)	514	578	1e-10	IPR020683	Ankyrin repeat-containing domain
g5550.t1	1310	PF13176	Tetratricopeptide repeat	320	341	0.021	IPR019734	Tetratricopeptide repeat	GO:0005515
g5550.t1	1310	PF13176	Tetratricopeptide repeat	28	51	0.019	IPR019734	Tetratricopeptide repeat	GO:0005515
g5550.t1	1310	PF13857	Ankyrin repeats (many copies)	586	624	1.5e-06
g5174.t2	389	PF00651	BTB/POZ domain	40	146	1.3e-27	IPR000210	BTB/POZ domain	GO:0005515
g5174.t2	389	PF07707	BTB And C-terminal Kelch	152	234	8.3e-16	IPR011705	BTB/Kelch-associated
g27323.t1	481	PF00028	Cadherin domain	144	248	7.3e-09	IPR002126	Cadherin	GO:0005509|GO:0007156|GO:0016020
g21098.t1	1235	PF14643	Domain of unknown function (DUF4455)	83	505	9.1e-10	IPR028089	Domain of unknown function DUF4455
g26856.t1	833	PF03950	tRNA synthetases class I (E and Q), anti-codon binding domain	625	811	1.4e-38	IPR020059	Glutamyl/glutaminyl-tRNA synthetase, class Ib, anti-codon binding domain	GO:0000166|GO:0004812|GO:0005524|GO:0005737|GO:0006418
g26856.t1	833	PF11095	Gem-associated protein 7 (Gemin7)	13	69	5.6e-14	IPR020338	SMN complex, gem-associated protein 7	GO:0034719
g26856.t1	833	PF04558	Glutaminyl-tRNA synthetase, non-specific RNA binding region part 1	77	232	5.4e-47	IPR007639	Glutaminyl-tRNA synthetase, class Ib, non-specific RNA-binding domain, N-terminal	GO:0000166|GO:0004812|GO:0005524|GO:0005737|GO:0006418
g26856.t1	833	PF04557	Glutaminyl-tRNA synthetase, non-specific RNA binding region part 2	235	316	2e-20	IPR007638	Glutaminyl-tRNA synthetase, class Ib, non-specific RNA-binding domain 2	GO:0000166|GO:0004819|GO:0005524|GO:0005737|GO:0006425
g26856.t1	833	PF00749	tRNA synthetases class I (E and Q), catalytic domain	323	605	3.2e-104	IPR020058	Glutamyl/glutaminyl-tRNA synthetase, class Ib, catalytic domain	GO:0005524|GO:0016876|GO:0043039
g3884.t1	1958	PF12130	Protein of unknown function (DUF3585)	1866	1943	2.6e-13	IPR022735	Domain of unknown function DUF3585
g3884.t1	1958	PF00412	LIM domain	631	688	1.1e-06	IPR001781	Zinc finger, LIM-type	GO:0008270
g3884.t1	1958	PF00307	Calponin homology (CH) domain	210	312	3.3e-15	IPR001715	Calponin homology domain	GO:0005515
g19155.t1	1032	PF13831	PHD-finger	754	784	7.6e-08
g19155.t1	1032	PF02375	jmjN domain	1	35	2.3e-13	IPR003349	JmjN domain
g19155.t1	1032	PF02373	JmjC domain, hydroxylase	164	280	2.9e-39	IPR003347	JmjC domain
g19155.t1	1032	PF13832	PHD-zinc-finger like domain	792	892	5.5e-12
g6905.t1	1745	PF14765	Polyketide synthase dehydratase	904	1106	1.3e-14	IPR020807	Polyketide synthase, dehydratase domain
g6905.t1	1745	PF16197	Ketoacyl-synthetase C-terminal extension	414	523	7.5e-37	IPR032821	Ketoacyl-synthetase, C-terminal extension
g6905.t1	1745	PF00107	Zinc-binding dehydrogenase	1610	1733	1.2e-20	IPR013149	Alcohol dehydrogenase, C-terminal	GO:0055114
g6905.t1	1745	PF00698	Acyl transferase domain	542	851	5.9e-72	IPR014043	Acyl transferase
g6905.t1	1745	PF02801	Beta-ketoacyl synthase, C-terminal domain	295	411	1.4e-37	IPR014031	Beta-ketoacyl synthase, C-terminal
g6905.t1	1745	PF00109	Beta-ketoacyl synthase, N-terminal domain	54	290	1.9e-65	IPR014030	Beta-ketoacyl synthase, N-terminal
g11325.t1	405	PF14291	Domain of unknown function (DUF4371)	47	277	2.9e-31	IPR025398	Domain of unknown function DUF4371
g3687.t1	4959	PF07728	AAA domain (dynein-related subfamily)	189	316	6.3e-17	IPR011704	ATPase, dynein-related, AAA domain	GO:0005524|GO:0016887
g3687.t1	4959	PF07728	AAA domain (dynein-related subfamily)	1575	1714	6.3e-17	IPR011704	ATPase, dynein-related, AAA domain	GO:0005524|GO:0016887
g3687.t1	4959	PF07728	AAA domain (dynein-related subfamily)	1227	1374	2.7e-22	IPR011704	ATPase, dynein-related, AAA domain	GO:0005524|GO:0016887
g3687.t1	4959	PF07728	AAA domain (dynein-related subfamily)	2022	2103	8.1e-05	IPR011704	ATPase, dynein-related, AAA domain	GO:0005524|GO:0016887
g3687.t1	4959	PF07728	AAA domain (dynein-related subfamily)	655	741	3.3e-08	IPR011704	ATPase, dynein-related, AAA domain	GO:0005524|GO:0016887
g3687.t1	4959	PF07728	AAA domain (dynein-related subfamily)	919	1056	7.7e-21	IPR011704	ATPase, dynein-related, AAA domain	GO:0005524|GO:0016887
g3687.t1	4959	PF07728	AAA domain (dynein-related subfamily)	516	562	1.4e-05	IPR011704	ATPase, dynein-related, AAA domain	GO:0005524|GO:0016887
g3687.t1	4959	PF00092	von Willebrand factor type A domain	4756	4909	1.3e-06	IPR002035	von Willebrand factor, type A
g6377.t1	230	PF14529	Endonuclease-reverse transcriptase	16	80	1.5e-09	IPR005135	Endonuclease/exonuclease/phosphatase
g4073.t1	133	PF12017	Transposase protein	20	119	6e-11	IPR021896	Transposase protein	GO:0004803|GO:0006313
g11460.t1	227	PF09588	YqaJ-like viral recombinase domain	96	173	8.6e-08	IPR019080	YqaJ viral recombinase
g4060.t1	916	PF01822	WSC domain	132	215	3.8e-20	IPR002889	Carbohydrate-binding WSC
g4060.t1	916	PF01822	WSC domain	25	103	6.7e-14	IPR002889	Carbohydrate-binding WSC
g4060.t1	916	PF01822	WSC domain	541	618	1.2e-14	IPR002889	Carbohydrate-binding WSC
g4060.t1	916	PF01822	WSC domain	234	314	4.3e-12	IPR002889	Carbohydrate-binding WSC
g4060.t1	916	PF01822	WSC domain	438	520	3.7e-16	IPR002889	Carbohydrate-binding WSC
g4060.t1	916	PF01822	WSC domain	337	416	3.8e-15	IPR002889	Carbohydrate-binding WSC
g18423.t1	336	PF14291	Domain of unknown function (DUF4371)	20	208	1.5e-34	IPR025398	Domain of unknown function DUF4371
g4528.t1	1043	PF13894	C2H2-type zinc finger	228	250	0.0011
g4528.t1	1043	PF13912	C2H2-type zinc finger	425	449	0.0089	IPR007087	Zinc finger, C2H2	GO:0046872
g17349.t1	207	PF01381	Helix-turn-helix	69	123	4.6e-12	IPR001387	Cro/C1-type helix-turn-helix domain	GO:0043565
g27478.t1	549	PF00017	SH2 domain	451	523	1.1e-14	IPR000980	SH2 domain
g4732.t1	806	PF01937	Protein of unknown function DUF89	542	789	6.9e-43	IPR002791	Domain of unknown function DUF89
g4732.t1	806	PF03630	Fumble	73	409	6.2e-136	IPR004567	Type II pantothenate kinase	GO:0004594|GO:0005524|GO:0015937
g17802.t1	359	PF14291	Domain of unknown function (DUF4371)	11	242	2.2e-32	IPR025398	Domain of unknown function DUF4371
g22440.t1	1655	PF01391	Collagen triple helix repeat (20 copies)	1321	1379	6.6e-08	IPR008160	Collagen triple helix repeat
g22440.t1	1655	PF13385	Concanavalin A-like lectin/glucanases superfamily	91	219	2.5e-08
g22440.t1	1655	PF01410	Fibrillar collagen C-terminal domain	1431	1654	1.1e-77	IPR000885	Fibrillar collagen, C-terminal	GO:0005201
g6102.t2	1307	PF00867	XPG I-region	146	233	5.1e-30	IPR006086	XPG-I domain	GO:0004518
g6102.t2	1307	PF04547	Calcium-activated chloride channel	691	1272	2.6e-147	IPR007632	Anoctamin
g6102.t2	1307	PF16178	Dimerisation domain of Ca+-activated chloride-channel, anoctamin	474	688	5.1e-51	IPR032394	Anoctamin, dimerisation domain	GO:0046983
g6102.t2	1307	PF00752	XPG N-terminal domain	1	107	3.7e-33	IPR006085	XPG N-terminal	GO:0004518|GO:0006281
g20863.t1	181	PF02996	Prefoldin subunit	54	169	2.3e-32	IPR004127	Prefoldin alpha-like
g1558.t1	758	PF00628	PHD-finger	309	355	1e-10	IPR019787	Zinc finger, PHD-finger	GO:0005515
g1558.t1	758	PF02928	C5HC2 zinc finger	692	741	9.9e-14	IPR004198	Zinc finger, C5HC2-type
g1558.t1	758	PF01388	ARID/BRIGHT DNA binding domain	114	196	4.3e-16	IPR001606	ARID DNA-binding domain	GO:0003677
g1558.t1	758	PF02373	JmjC domain, hydroxylase	486	602	1e-43	IPR003347	JmjC domain
g1558.t1	758	PF02375	jmjN domain	47	80	5.1e-16	IPR003349	JmjN domain
g13531.t1	142	PF03221	Tc5 transposase DNA-binding domain	72	132	4.6e-15	IPR006600	HTH CenpB-type DNA-binding domain
g27548.t1	520	PF00628	PHD-finger	469	515	6.4e-11	IPR019787	Zinc finger, PHD-finger	GO:0005515
g27548.t1	520	PF14051	N-terminal domain of DPF2/REQ.	19	90	1e-33	IPR025750	Requiem/DPF N-terminal domain
g19882.t1	163	PF12259	Baculovirus F protein	14	152	1.2e-11	IPR022048	Envelope fusion protein-like
g12476.t1	697	PF01057	Parvovirus non-structural protein NS1	427	534	6.2e-13	IPR001257	Parvovirus non-structural protein 1, helicase domain	GO:0019079
g27141.t1	111	PF14291	Domain of unknown function (DUF4371)	33	89	9.7e-06	IPR025398	Domain of unknown function DUF4371
g23103.t1	2806	PF07645	Calcium-binding EGF domain	202	239	1.7e-06	IPR001881	EGF-like calcium-binding domain	GO:0005509
g23103.t1	2806	PF00058	Low-density lipoprotein receptor repeat class B	1978	2024	9.5e-06	IPR000033	LDLR class B repeat
g23103.t1	2806	PF00058	Low-density lipoprotein receptor repeat class B	2428	2467	0.00016	IPR000033	LDLR class B repeat
g23103.t1	2806	PF00058	Low-density lipoprotein receptor repeat class B	1372	1412	2e-09	IPR000033	LDLR class B repeat
g23103.t1	2806	PF00058	Low-density lipoprotein receptor repeat class B	2385	2425	1.1e-05	IPR000033	LDLR class B repeat
g23103.t1	2806	PF14670	Coagulation Factor Xa inhibitory site	1559	1595	1.1e-08
g23103.t1	2806	PF00057	Low-density lipoprotein receptor domain class A	1099	1135	2.9e-10	IPR002172	Low-density lipoprotein (LDL) receptor class A repeat	GO:0005515
g23103.t1	2806	PF00057	Low-density lipoprotein receptor domain class A	888	922	1.3e-09	IPR002172	Low-density lipoprotein (LDL) receptor class A repeat	GO:0005515
g23103.t1	2806	PF00057	Low-density lipoprotein receptor domain class A	973	1012	3.4e-07	IPR002172	Low-density lipoprotein (LDL) receptor class A repeat	GO:0005515
g23103.t1	2806	PF00057	Low-density lipoprotein receptor domain class A	1016	1051	1.4e-08	IPR002172	Low-density lipoprotein (LDL) receptor class A repeat	GO:0005515
g23103.t1	2806	PF00057	Low-density lipoprotein receptor domain class A	34	71	1e-10	IPR002172	Low-density lipoprotein (LDL) receptor class A repeat	GO:0005515
g23103.t1	2806	PF00057	Low-density lipoprotein receptor domain class A	2643	2678	2.9e-08	IPR002172	Low-density lipoprotein (LDL) receptor class A repeat	GO:0005515
g23103.t1	2806	PF00057	Low-density lipoprotein receptor domain class A	1159	1195	4.9e-07	IPR002172	Low-density lipoprotein (LDL) receptor class A repeat	GO:0005515
g23103.t1	2806	PF00057	Low-density lipoprotein receptor domain class A	2735	2765	2.4e-08	IPR002172	Low-density lipoprotein (LDL) receptor class A repeat	GO:0005515
g23103.t1	2806	PF00057	Low-density lipoprotein receptor domain class A	2693	2723	1.8e-08	IPR002172	Low-density lipoprotein (LDL) receptor class A repeat	GO:0005515
g23103.t1	2806	PF00057	Low-density lipoprotein receptor domain class A	933	966	2.6e-09	IPR002172	Low-density lipoprotein (LDL) receptor class A repeat	GO:0005515
g23103.t1	2806	PF00057	Low-density lipoprotein receptor domain class A	75	119	1.1e-05	IPR002172	Low-density lipoprotein (LDL) receptor class A repeat	GO:0005515
g23103.t1	2806	PF00057	Low-density lipoprotein receptor domain class A	2564	2601	1.3e-05	IPR002172	Low-density lipoprotein (LDL) receptor class A repeat	GO:0005515
g6744.t1	604	PF02078	Synapsin, N-terminal domain	208	308	1.4e-36	IPR020897	Synapsin, pre-ATP-grasp domain
g6744.t1	604	PF02750	Synapsin, ATP binding domain	310	510	6e-80	IPR020898	Synapsin, ATP-binding domain
g9463.t1	133	PF05699	hAT family C-terminal dimerisation region	43	108	4.8e-09	IPR008906	HAT, C-terminal dimerisation domain	GO:0046983
g23077.t2	447	PF00046	Homeobox domain	183	239	2.1e-22	IPR001356	Homeobox domain	GO:0003677
g23077.t2	447	PF00292	'Paired box' domain	19	144	1e-69	IPR001523	Paired domain	GO:0003677|GO:0006355
g7042.t1	581	PF07993	Male sterility protein	87	357	3.6e-71	IPR013120	Male sterility, NAD-binding
g7042.t1	581	PF03015	Male sterility protein	447	539	3.1e-30	IPR033640	Fatty acyl-CoA reductase, C-terminal
g18852.t1	289	PF03184	DDE superfamily endonuclease	73	191	1.1e-19	IPR004875	DDE superfamily endonuclease domain	GO:0003676
g18852.t1	289	PF04218	CENP-B N-terminal DNA-binding domain	2	48	1.1e-07	IPR007889	DNA binding HTH domain, Psq-type	GO:0003677
g19086.t1	148	PF10431	C-terminal, D2-small domain, of ClpB protein	52	131	1.9e-10	IPR019489	Clp ATPase, C-terminal
g20213.t1	145	PF00550	Phosphopantetheine attachment site	81	137	1.5e-11	IPR009081	Phosphopantetheine binding ACP domain
g26421.t1	840	PF00415	Regulator of chromosome condensation (RCC1) repeat	498	545	2.1e-08	IPR000408	Regulator of chromosome condensation, RCC1
g26421.t1	840	PF00415	Regulator of chromosome condensation (RCC1) repeat	600	649	8.6e-12	IPR000408	Regulator of chromosome condensation, RCC1
g26421.t1	840	PF00415	Regulator of chromosome condensation (RCC1) repeat	549	597	4.1e-07	IPR000408	Regulator of chromosome condensation, RCC1
g26421.t1	840	PF00069	Protein kinase domain	176	424	3.4e-58	IPR000719	Protein kinase domain	GO:0004672|GO:0005524|GO:0006468
g23427.t1	486	PF00076	RNA recognition motif. (a.k.a. RRM, RBD, or RNP domain)	26	93	3.2e-08	IPR000504	RNA recognition motif domain	GO:0003676
g19196.t1	633	PF00627	UBA/TS-N domain	23	55	9e-09	IPR015940	Ubiquitin-associated domain
g19196.t1	633	PF14604	Variant SH3 domain	245	299	6.8e-13	IPR001452	SH3 domain	GO:0005515
g19196.t1	633	PF00300	Histidine phosphatase superfamily (branch 1)	411	578	1e-10	IPR013078	Histidine phosphatase superfamily, clade-1
g27040.t4	506	PF00412	LIM domain	332	387	1.2e-16	IPR001781	Zinc finger, LIM-type	GO:0008270
g27040.t4	506	PF00412	LIM domain	450	504	6.2e-13	IPR001781	Zinc finger, LIM-type	GO:0008270
g27040.t4	506	PF00412	LIM domain	273	327	1.5e-17	IPR001781	Zinc finger, LIM-type	GO:0008270
g27040.t4	506	PF00412	LIM domain	391	445	4e-14	IPR001781	Zinc finger, LIM-type	GO:0008270
g10052.t1	445	PF01753	MYND finger	72	111	1.5e-05	IPR002893	Zinc finger, MYND-type
g10052.t1	445	PF00856	SET domain	230	299	4.6e-05	IPR001214	SET domain	GO:0005515
g20672.t1	353	PF02535	ZIP Zinc transporter	7	323	1.3e-54	IPR003689	Zinc/iron permease	GO:0016020|GO:0030001|GO:0046873|GO:0055085
g2042.t1	443	PF07690	Major Facilitator Superfamily	28	314	4.3e-23	IPR011701	Major facilitator superfamily	GO:0016021|GO:0055085
g9274.t1	1311	PF05729	NACHT domain	37	229	1.3e-08
g9274.t1	1311	PF12796	Ankyrin repeats (3 copies)	933	1023	4.1e-16	IPR020683	Ankyrin repeat-containing domain
g9274.t1	1311	PF12796	Ankyrin repeats (3 copies)	791	857	9.6e-12	IPR020683	Ankyrin repeat-containing domain
g9274.t1	1311	PF12796	Ankyrin repeats (3 copies)	630	723	3.8e-14	IPR020683	Ankyrin repeat-containing domain
g9274.t1	1311	PF12796	Ankyrin repeats (3 copies)	859	924	9.5e-12	IPR020683	Ankyrin repeat-containing domain
g9274.t1	1311	PF12796	Ankyrin repeats (3 copies)	1026	1080	3.5e-07	IPR020683	Ankyrin repeat-containing domain
g9274.t1	1311	PF12796	Ankyrin repeats (3 copies)	527	620	1.9e-17	IPR020683	Ankyrin repeat-containing domain
g9274.t1	1311	PF13637	Ankyrin repeats (many copies)	728	781	1.1e-09
g2932.t1	873	PF00271	Helicase conserved C-terminal domain	432	558	2.2e-12	IPR001650	Helicase, C-terminal
g2932.t1	873	PF00270	DEAD/DEAH box helicase	235	388	5.6e-06	IPR011545	DEAD/DEAH box helicase domain	GO:0003676|GO:0005524
g2932.t1	873	PF07717	Oligonucleotide/oligosaccharide-binding (OB)-fold	763	844	5.4e-23	IPR011709	Domain of unknown function DUF1605
g2932.t1	873	PF04408	Helicase associated domain (HA2)	621	710	2.8e-24	IPR007502	Helicase-associated domain	GO:0004386
g4377.t1	114	PF04218	CENP-B N-terminal DNA-binding domain	2	52	3.9e-10	IPR007889	DNA binding HTH domain, Psq-type	GO:0003677
g4377.t1	114	PF03221	Tc5 transposase DNA-binding domain	68	107	2.8e-06	IPR006600	HTH CenpB-type DNA-binding domain
g6416.t1	664	PF00271	Helicase conserved C-terminal domain	351	461	2.5e-33	IPR001650	Helicase, C-terminal
g6416.t1	664	PF00270	DEAD/DEAH box helicase	144	315	4.7e-48	IPR011545	DEAD/DEAH box helicase domain	GO:0003676|GO:0005524
g24147.t1	395	PF10225	NEMP family	134	231	8e-25	IPR019358	NEMP family
g24147.t1	395	PF10225	NEMP family	226	352	1.4e-30	IPR019358	NEMP family
g4893.t1	426	PF00098	Zinc knuckle	370	384	0.0008	IPR001878	Zinc finger, CCHC-type	GO:0003676|GO:0008270
g4125.t1	573	PF00643	B-box zinc finger	127	169	2.3e-06	IPR000315	B-box-type zinc finger	GO:0005622|GO:0008270
g4125.t1	573	PF00097	Zinc finger, C3HC4 type (RING finger)	28	70	6.2e-05	IPR018957	Zinc finger, C3HC4 RING-type	GO:0046872
g4125.t1	573	PF00025	ADP-ribosylation factor family	398	563	5.5e-66	IPR006689	Small GTPase superfamily, ARF/SAR type	GO:0005525
g26414.t1	728	PF03098	Animal haem peroxidase	150	691	5.2e-181	IPR019791	Haem peroxidase, animal
g21954.t1	757	PF13896	Glycosyl-transferase for dystroglycan	544	748	2.3e-48
g21954.t1	757	PF13896	Glycosyl-transferase for dystroglycan	479	542	1.2e-09
g21954.t1	757	PF01501	Glycosyl transferase family 8	164	398	2.1e-15	IPR002495	Glycosyl transferase, family 8	GO:0016757
g19873.t1	271	PF03807	NADP oxidoreductase coenzyme F420-dependent	3	99	2.8e-16	IPR028939	Pyrroline-5-carboxylate reductase, catalytic, N-terminal
g19873.t1	271	PF14748	Pyrroline-5-carboxylate reductase dimerisation	163	266	7.3e-37	IPR029036	Pyrroline-5-carboxylate reductase, dimerisation domain
g4078.t2	516	PF04677	Protein similar to CwfJ C-terminus 1	294	409	5.1e-31	IPR006768	Cwf19-like, C-terminal domain-1
g4078.t2	516	PF04676	Protein similar to CwfJ C-terminus 2	438	512	2.8e-08	IPR006767	Cwf19-like protein, C-terminal domain-2
g4519.t1	865	PF07679	Immunoglobulin I-set domain	302	393	2.5e-11	IPR013098	Immunoglobulin I-set
g4519.t1	865	PF07679	Immunoglobulin I-set domain	123	181	9.9e-10	IPR013098	Immunoglobulin I-set
g4519.t1	865	PF07679	Immunoglobulin I-set domain	206	292	3.2e-12	IPR013098	Immunoglobulin I-set
g4519.t1	865	PF00047	Immunoglobulin domain	13	99	1.7e-06	IPR013151	Immunoglobulin
g4519.t1	865	PF00041	Fibronectin type III domain	492	578	4.4e-10	IPR003961	Fibronectin type III	GO:0005515
g4519.t1	865	PF00041	Fibronectin type III domain	613	694	2.5e-08	IPR003961	Fibronectin type III	GO:0005515
g14157.t1	142	PF03221	Tc5 transposase DNA-binding domain	72	132	7.5e-18	IPR006600	HTH CenpB-type DNA-binding domain
g14157.t1	142	PF04218	CENP-B N-terminal DNA-binding domain	3	53	1.4e-09	IPR007889	DNA binding HTH domain, Psq-type	GO:0003677
g2387.t1	548	PF05010	Transforming acidic coiled-coil-containing protein (TACC)	346	542	9.6e-39	IPR007707	Transforming acidic coiled-coil-containing protein
g4593.t1	269	PF05739	SNARE domain	209	260	3.8e-13	IPR000727	Target SNARE coiled-coil homology domain	GO:0005515
g4593.t1	269	PF14523	Syntaxin-like protein	25	126	6e-26
g10056.t1	624	PF03564	Protein of unknown function (DUF1759)	144	283	2.8e-30	IPR005312	Protein of unknown function DUF1759
g10056.t1	624	PF13650	Aspartyl protease	466	512	1.1e-05
g13957.t1	434	PF14291	Domain of unknown function (DUF4371)	9	91	1.6e-08	IPR025398	Domain of unknown function DUF4371
g13957.t1	434	PF05699	hAT family C-terminal dimerisation region	349	403	2.9e-08	IPR008906	HAT, C-terminal dimerisation domain	GO:0046983
g24347.t1	143	PF02689	Helicase	69	116	9.1e-05	IPR003840	DNA helicase	GO:0004386|GO:0005524
g8110.t1	1024	PF08952	Domain of unknown function (DUF1866)	848	973	8.4e-17	IPR015047	Domain of unknown function DUF1866
g8110.t1	1024	PF03372	Endonuclease/Exonuclease/phosphatase family	541	840	1.6e-06	IPR005135	Endonuclease/exonuclease/phosphatase
g8110.t1	1024	PF02383	SacI homology domain	67	351	1.4e-67	IPR002013	SAC domain	GO:0042578
g10150.t1	117	PF02212	Dynamin GTPase effector domain	28	111	4.3e-13	IPR003130	Dynamin GTPase effector	GO:0003924|GO:0005525
g4486.t1	319	PF06309	Torsin	65	183	4.6e-28	IPR010448	Torsin	GO:0005524
g25819.t1	928	PF11934	Domain of unknown function (DUF3452)	80	212	6.5e-45	IPR024599	Retinoblastoma-associated protein, N-terminal
g25819.t1	928	PF01857	Retinoblastoma-associated protein B domain	666	800	1.4e-49	IPR002719	Retinoblastoma-associated protein, B-box	GO:0005634|GO:0051726
g25819.t1	928	PF01858	Retinoblastoma-associated protein A domain	379	570	1.5e-64	IPR002720	Retinoblastoma-associated protein, A-box	GO:0005634|GO:0051726
g12931.t1	147	PF13894	C2H2-type zinc finger	54	77	0.00029
g20000.t1	1825	PF14776	Cation-channel complex subunit UNC-79	65	594	9.4e-223
g15405.t1	107	PF00096	Zinc finger, C2H2 type	2	24	1.3e-05	IPR007087	Zinc finger, C2H2	GO:0046872
g15405.t1	107	PF13894	C2H2-type zinc finger	29	52	0.00065
g23709.t1	1935	PF01437	Plexin repeat	651	685	1.5e-07	IPR002165	Plexin repeat	GO:0016020
g23709.t1	1935	PF01437	Plexin repeat	503	539	3.7e-09	IPR002165	Plexin repeat	GO:0016020
g23709.t1	1935	PF01403	Sema domain	57	479	1.5e-59	IPR001627	Sema domain	GO:0005515
g23709.t1	1935	PF01833	IPT/TIG domain	864	942	0.00016	IPR002909	IPT domain	GO:0005515
g23709.t1	1935	PF01833	IPT/TIG domain	1172	1260	5.1e-09	IPR002909	IPT domain	GO:0005515
g23709.t1	1935	PF01833	IPT/TIG domain	956	1040	0.00025	IPR002909	IPT domain	GO:0005515
g23709.t1	1935	PF08337	Plexin cytoplasmic RasGAP domain	1346	1905	6.7e-247	IPR013548	Plexin, cytoplasmic RasGAP domain
g25733.t1	249	PF00106	short chain dehydrogenase	7	199	2.3e-40	IPR002347	Short-chain dehydrogenase/reductase SDR
g18219.t1	45	PF10545	Alcohol dehydrogenase transcription factor Myb/SANT-like	7	43	5.3e-07	IPR006578	MADF domain
g24948.t1	2262	PF13432	Tetratricopeptide repeat	30	76	6.2e-05
g24948.t1	2262	PF13176	Tetratricopeptide repeat	603	637	0.00018	IPR019734	Tetratricopeptide repeat	GO:0005515
g24948.t1	2262	PF13176	Tetratricopeptide repeat	764	793	0.012	IPR019734	Tetratricopeptide repeat	GO:0005515
g24948.t1	2262	PF12770	CHAT domain	1333	1635	9e-60	IPR024983	CHAT domain
g24948.t1	2262	PF13181	Tetratricopeptide repeat	682	707	0.12	IPR019734	Tetratricopeptide repeat	GO:0005515
g24948.t1	2262	PF13424	Tetratricopeptide repeat	520	589	4.9e-09
g24948.t1	2262	PF13424	Tetratricopeptide repeat	1004	1072	3.4e-11
g24948.t1	2262	PF13424	Tetratricopeptide repeat	360	431	2.4e-10
g24948.t1	2262	PF13424	Tetratricopeptide repeat	801	873	4.1e-08
g24948.t1	2262	PF13424	Tetratricopeptide repeat	445	512	3.1e-10
g24948.t1	2262	PF13424	Tetratricopeptide repeat	281	352	2.1e-08
g9206.t1	495	PF00098	Zinc knuckle	442	457	8.9e-05	IPR001878	Zinc finger, CCHC-type	GO:0003676|GO:0008270
g23572.t1	84	PF08686	PLAC (protease and lacunin) domain	53	83	8e-09	IPR010909	PLAC	GO:0008233
g15337.t1	57	PF10545	Alcohol dehydrogenase transcription factor Myb/SANT-like	7	42	9.6e-07	IPR006578	MADF domain
g12198.t1	386	PF09724	Uncharacterized conserved protein (DUF2036)	46	359	2.6e-95	IPR019128	Sister chromatid cohesion protein Dcc1
g5746.t1	652	PF00004	ATPase family associated with various cellular activities (AAA)	269	401	1.8e-39	IPR003959	ATPase, AAA-type, core	GO:0005524
g5746.t1	652	PF06480	FtsH Extracellular	70	161	3.4e-06	IPR011546	Peptidase M41, FtsH extracellular	GO:0004222|GO:0005524|GO:0008270|GO:0016021
g5746.t1	652	PF01434	Peptidase family M41	465	646	4.6e-62	IPR000642	Peptidase M41	GO:0004222|GO:0005524|GO:0006508
g659.t1	828	PF00595	PDZ domain (Also known as DHR or GLGF)	248	335	1.1e-18	IPR001478	PDZ domain	GO:0005515
g659.t1	828	PF00595	PDZ domain (Also known as DHR or GLGF)	154	228	5.1e-14	IPR001478	PDZ domain	GO:0005515
g659.t1	828	PF00018	SH3 domain	473	529	8.6e-06	IPR001452	SH3 domain	GO:0005515
g659.t1	828	PF09058	L27_1	5	63	6.3e-21	IPR015143	L27-1
g659.t1	828	PF00625	Guanylate kinase	637	813	5.5e-57	IPR008145	Guanylate kinase/L-type calcium channel beta subunit
g16772.t1	172	PF00648	Calpain family cysteine protease	36	172	5.6e-59	IPR001300	Peptidase C2, calpain, catalytic domain	GO:0004198|GO:0005622|GO:0006508
g2130.t1	3971	PF12780	P-loop containing dynein motor region D4	2255	2516	8.5e-65	IPR024317	Dynein heavy chain, P-loop containing D4 domain
g2130.t1	3971	PF03028	Dynein heavy chain and region D6 of dynein motor	3266	3967	2e-261	IPR004273	Dynein heavy chain domain	GO:0003777|GO:0007018|GO:0030286
g2130.t1	3971	PF12777	Microtubule-binding stalk of dynein motor	2533	2877	1.2e-49	IPR024743	Dynein heavy chain, coiled coil stalk
g2130.t1	3971	PF07728	AAA domain (dynein-related subfamily)	1567	1707	4e-05	IPR011704	ATPase, dynein-related, AAA domain	GO:0005524|GO:0016887
g2130.t1	3971	PF08393	Dynein heavy chain, N-terminal region 2	711	1142	7.8e-117	IPR013602	Dynein heavy chain, domain-2
g2130.t1	3971	PF12775	P-loop containing dynein motor region D3	1894	2158	2.6e-47
g2130.t1	3971	PF12774	Hydrolytic ATP binding site of dynein motor region D1	1252	1479	1.4e-88
g2130.t1	3971	PF12781	ATP-binding dynein motor region D5	2905	3125	6.8e-78
g25872.t1	1223	PF08473	Neuronal voltage-dependent calcium channel alpha 2acd	714	1007	3.9e-20	IPR013680	Voltage-dependent calcium channel, alpha-2/delta subunit, conserved region
g25872.t1	1223	PF02743	Cache domain	442	571	2.4e-15	IPR033479	Double Cache domain 1
g25872.t1	1223	PF08399	VWA N-terminal	173	221	4.6e-15	IPR013608	VWA N-terminal
g26149.t1	1165	PF00412	LIM domain	1069	1124	5.1e-11	IPR001781	Zinc finger, LIM-type	GO:0008270
g26149.t1	1165	PF00412	LIM domain	475	529	5.1e-12	IPR001781	Zinc finger, LIM-type	GO:0008270
g26379.t1	805	PF01067	Calpain large subunit, domain III	684	793	1.2e-10	IPR022682	Peptidase C2, calpain, large subunit, domain III
g26379.t1	805	PF04212	MIT (microtubule interacting and transport) domain	90	154	5.3e-09	IPR007330	MIT
g26379.t1	805	PF04212	MIT (microtubule interacting and transport) domain	5	68	2.5e-09	IPR007330	MIT
g26379.t1	805	PF00648	Calpain family cysteine protease	235	522	1e-50	IPR001300	Peptidase C2, calpain, catalytic domain	GO:0004198|GO:0005622|GO:0006508
g24373.t1	119	PF03221	Tc5 transposase DNA-binding domain	72	114	4.3e-06	IPR006600	HTH CenpB-type DNA-binding domain
g25022.t1	1811	PF01562	Reprolysin family propeptide	80	195	6.5e-22	IPR002870	Peptidase M12B, propeptide
g25022.t1	1811	PF00090	Thrombospondin type 1 domain	1202	1252	0.02	IPR000884	Thrombospondin type-1 (TSP1) repeat
g25022.t1	1811	PF00090	Thrombospondin type 1 domain	1552	1603	0.037	IPR000884	Thrombospondin type-1 (TSP1) repeat
g25022.t1	1811	PF00090	Thrombospondin type 1 domain	1259	1283	0.022	IPR000884	Thrombospondin type-1 (TSP1) repeat
g25022.t1	1811	PF00090	Thrombospondin type 1 domain	1467	1509	2e-05	IPR000884	Thrombospondin type-1 (TSP1) repeat
g25022.t1	1811	PF00090	Thrombospondin type 1 domain	1319	1371	0.00037	IPR000884	Thrombospondin type-1 (TSP1) repeat
g25022.t1	1811	PF00090	Thrombospondin type 1 domain	601	650	1e-05	IPR000884	Thrombospondin type-1 (TSP1) repeat
g25022.t1	1811	PF00090	Thrombospondin type 1 domain	1065	1114	3.2e-05	IPR000884	Thrombospondin type-1 (TSP1) repeat
g25022.t1	1811	PF00090	Thrombospondin type 1 domain	1119	1165	3.7e-07	IPR000884	Thrombospondin type-1 (TSP1) repeat
g25022.t1	1811	PF00090	Thrombospondin type 1 domain	1384	1436	2e-08	IPR000884	Thrombospondin type-1 (TSP1) repeat
g25022.t1	1811	PF00090	Thrombospondin type 1 domain	1009	1059	8.8e-06	IPR000884	Thrombospondin type-1 (TSP1) repeat
g25022.t1	1811	PF05986	ADAM-TS Spacer 1	761	879	1.3e-24	IPR010294	ADAM-TS Spacer 1	GO:0004222|GO:0031012
g25022.t1	1811	PF08685	GON domain	1607	1808	4.5e-72	IPR012314	Peptidase M12B, GON-ADAMTSs	GO:0004222|GO:0008270
g25022.t1	1811	PF01421	Reprolysin (M12B) family zinc metalloprotease	286	500	9.4e-20	IPR001590	Peptidase M12B, ADAM/reprolysin	GO:0004222|GO:0006508
g25138.t1	340	PF08127	Peptidase family C1 propeptide	24	61	2.6e-13	IPR012599	Peptidase C1A, propeptide	GO:0004197|GO:0050790
g25138.t1	340	PF00112	Papain family cysteine protease	88	333	1.6e-58	IPR000668	Peptidase C1A, papain C-terminal	GO:0006508|GO:0008234
g19577.t1	634	PF00069	Protein kinase domain	293	537	5.4e-66	IPR000719	Protein kinase domain	GO:0004672|GO:0005524|GO:0006468
g19577.t1	634	PF00130	Phorbol esters/diacylglycerol binding domain (C1 domain)	147	198	6e-15	IPR002219	Protein kinase C-like, phorbol ester/diacylglycerol-binding domain	GO:0035556
g19577.t1	634	PF00130	Phorbol esters/diacylglycerol binding domain (C1 domain)	75	125	2e-16	IPR002219	Protein kinase C-like, phorbol ester/diacylglycerol-binding domain	GO:0035556
g19577.t1	634	PF00433	Protein kinase C terminal domain	573	614	3.5e-09	IPR017892	Protein kinase, C-terminal	GO:0004674|GO:0005524|GO:0006468
g27638.t1	240	PF03981	Ubiquinol-cytochrome C chaperone	97	229	4.1e-29	IPR021150	Ubiquinol-cytochrome c chaperone/UPF0174
g8431.t1	278	PF05699	hAT family C-terminal dimerisation region	185	255	2.6e-10	IPR008906	HAT, C-terminal dimerisation domain	GO:0046983
g8406.t1	339	PF03118	Bacterial RNA polymerase, alpha chain C terminal domain	266	312	2.6e-14	IPR011260	RNA polymerase, alpha subunit, C-terminal	GO:0003677|GO:0003899|GO:0006351
g8406.t1	339	PF01193	RNA polymerase Rpb3/Rpb11 dimerisation domain	36	225	1.2e-13	IPR011263	DNA-directed RNA polymerase, RpoA/D/Rpb3-type	GO:0003899|GO:0006351
g8406.t1	339	PF01000	RNA polymerase Rpb3/RpoA insert domain	70	158	2e-12	IPR011262	DNA-directed RNA polymerase, insert domain	GO:0003899|GO:0006351|GO:0046983
g23296.t1	610	PF10431	C-terminal, D2-small domain, of ClpB protein	497	568	5.1e-13	IPR019489	Clp ATPase, C-terminal
g23296.t1	610	PF07724	AAA domain (Cdc48 subfamily)	271	490	1.7e-40	IPR003959	ATPase, AAA-type, core	GO:0005524
g25213.t1	344	PF14291	Domain of unknown function (DUF4371)	165	288	2.4e-21	IPR025398	Domain of unknown function DUF4371
g25213.t1	344	PF05699	hAT family C-terminal dimerisation region	283	332	5.7e-10	IPR008906	HAT, C-terminal dimerisation domain	GO:0046983
g2386.t1	661	PF02807	ATP:guanido phosphotransferase, N-terminal domain	346	416	1.7e-30	IPR022413	ATP:guanido phosphotransferase, N-terminal	GO:0016301|GO:0016772
g2386.t1	661	PF00217	ATP:guanido phosphotransferase, C-terminal catalytic domain	445	660	2.3e-84	IPR022414	ATP:guanido phosphotransferase, catalytic domain	GO:0016301|GO:0016772
g1305.t1	881	PF04675	DNA ligase N terminus	140	317	1.3e-31	IPR012308	DNA ligase, ATP-dependent, N-terminal	GO:0003677|GO:0003910|GO:0006281|GO:0006310
g1305.t1	881	PF01068	ATP dependent DNA ligase domain	363	557	1.2e-58	IPR012310	DNA ligase, ATP-dependent, central	GO:0003910|GO:0005524|GO:0006281|GO:0006310
g1305.t1	881	PF04679	ATP dependent DNA ligase C terminal region	585	694	7.9e-17	IPR012309	DNA ligase, ATP-dependent, C-terminal	GO:0003910|GO:0006281|GO:0006310
g1305.t1	881	PF00645	Poly(ADP-ribose) polymerase and DNA-Ligase Zn-finger region	13	92	2.1e-15	IPR001510	Zinc finger, PARP-type	GO:0003677|GO:0008270
g1305.t1	881	PF16759	DNA ligase 3 BRCT domain	781	873	1.6e-24	IPR031916	DNA ligase 3, BRCT domain
g20054.t1	534	PF01607	Chitin binding Peritrophin-A domain	45	103	4.7e-09	IPR002557	Chitin binding domain	GO:0005576|GO:0006030|GO:0008061
g3207.t1	1032	PF13181	Tetratricopeptide repeat	165	191	5e-05	IPR019734	Tetratricopeptide repeat	GO:0005515
g3207.t1	1032	PF13181	Tetratricopeptide repeat	228	260	0.2	IPR019734	Tetratricopeptide repeat	GO:0005515
g3207.t1	1032	PF13844	Glycosyl transferase family 41	557	1023	3.5e-253	IPR029489	O-GlcNAc transferase, C-terminal
g3207.t1	1032	PF13414	TPR repeat	440	473	9e-10	IPR011990	Tetratricopeptide-like helical domain	GO:0005515
g3207.t1	1032	PF13414	TPR repeat	375	410	3.1e-11	IPR011990	Tetratricopeptide-like helical domain	GO:0005515
g3207.t1	1032	PF13414	TPR repeat	270	309	1.2e-11	IPR011990	Tetratricopeptide-like helical domain	GO:0005515
g3207.t1	1032	PF13414	TPR repeat	98	138	1.8e-08	IPR011990	Tetratricopeptide-like helical domain	GO:0005515
g3207.t1	1032	PF00515	Tetratricopeptide repeat	193	226	2.7e-07	IPR001440	Tetratricopeptide repeat 1	GO:0005515
g3207.t1	1032	PF13374	Tetratricopeptide repeat	329	357	0.00031	IPR011990	Tetratricopeptide-like helical domain	GO:0005515
g20118.t2	387	PF02949	7tm Odorant receptor	128	357	9.2e-21	IPR004117	Olfactory receptor, insect	GO:0004984|GO:0005549|GO:0007608|GO:0016020
g1399.t1	237	PF09445	RNA cap guanine-N2 methyltransferase	69	219	7.6e-33	IPR019012	RNA cap guanine-N2 methyltransferase	GO:0001510|GO:0008168|GO:0009452
g12577.t1	386	PF16900	Replication protein A OB domain	268	364	3.6e-15	IPR031657	Replication protein A, OB domain
g12577.t1	386	PF04057	Replication factor-A protein 1, N-terminal domain	5	106	2.7e-09	IPR007199	Replication factor-A protein 1, N-terminal	GO:0003677|GO:0005634|GO:0006260
g10912.t1	564	PF08645	Polynucleotide kinase 3 phosphatase	234	288	3.1e-15	IPR013954	Polynucleotide kinase 3 phosphatase
g10912.t1	564	PF08645	Polynucleotide kinase 3 phosphatase	289	370	2.4e-28	IPR013954	Polynucleotide kinase 3 phosphatase
g10912.t1	564	PF13671	AAA domain	447	529	4.8e-08
g16210.t1	212	PF13414	TPR repeat	81	122	1.3e-06	IPR011990	Tetratricopeptide-like helical domain	GO:0005515
g16210.t1	212	PF13181	Tetratricopeptide repeat	23	51	0.00039	IPR019734	Tetratricopeptide repeat	GO:0005515
g23519.t1	558	PF14291	Domain of unknown function (DUF4371)	261	439	1e-12	IPR025398	Domain of unknown function DUF4371
g7397.t1	917	PF01070	FMN-dependent dehydrogenase	18	356	7e-127	IPR000262	FMN-dependent dehydrogenase	GO:0016491
g7397.t1	917	PF02771	Acyl-CoA dehydrogenase, N-terminal domain	461	533	8.2e-07	IPR013786	Acyl-CoA dehydrogenase/oxidase, N-terminal	GO:0008152|GO:0016627|GO:0050660|GO:0055114
g24593.t1	317	PF05699	hAT family C-terminal dimerisation region	265	315	1.7e-09	IPR008906	HAT, C-terminal dimerisation domain	GO:0046983
g3871.t1	486	PF01490	Transmembrane amino acid transporter protein	109	480	3.6e-72	IPR013057	Amino acid transporter, transmembrane domain
g25095.t1	341	PF03388	Legume-like lectin family	41	265	4.4e-94	IPR005052	Legume-like lectin	GO:0016020
g6646.t1	418	PF04111	Autophagy protein Apg6	106	412	4.7e-115	IPR007243	Atg6/Beclin	GO:0006914
g4460.t1	1405	PF13927	Immunoglobulin domain	987	1072	2.7e-11
g4460.t1	1405	PF01682	DB module	150	243	1.9e-15	IPR002602	Domain of unknown function DB
g4460.t1	1405	PF01682	DB module	595	685	5.3e-14	IPR002602	Domain of unknown function DB
g4460.t1	1405	PF01682	DB module	388	479	4.7e-13	IPR002602	Domain of unknown function DB
g4460.t1	1405	PF01682	DB module	1097	1185	2.9e-13	IPR002602	Domain of unknown function DB
g4460.t1	1405	PF07686	Immunoglobulin V-set domain	16	108	6.2e-08	IPR013106	Immunoglobulin V-set domain
g4460.t1	1405	PF00041	Fibronectin type III domain	804	886	7.6e-12	IPR003961	Fibronectin type III	GO:0005515
g4460.t1	1405	PF00041	Fibronectin type III domain	252	354	1.1e-11	IPR003961	Fibronectin type III	GO:0005515
g4460.t1	1405	PF00041	Fibronectin type III domain	695	782	8.4e-10	IPR003961	Fibronectin type III	GO:0005515
g4460.t1	1405	PF00041	Fibronectin type III domain	488	568	1.4e-13	IPR003961	Fibronectin type III	GO:0005515
g4460.t1	1405	PF00041	Fibronectin type III domain	1193	1269	1.7e-11	IPR003961	Fibronectin type III	GO:0005515
g17485.t1	398	PF14291	Domain of unknown function (DUF4371)	22	204	1.6e-24	IPR025398	Domain of unknown function DUF4371
g269.t1	3470	PF02138	Beige/BEACH domain	2594	2874	1.2e-124	IPR000409	BEACH domain
g269.t1	3470	PF01363	FYVE zinc finger	3401	3465	9e-18	IPR000306	FYVE zinc finger	GO:0046872
g269.t1	3470	PF14844	PH domain associated with Beige/BEACH	2500	2551	2.8e-11	IPR023362	PH-BEACH domain
g5115.t1	1294	PF01608	I/LWEQ domain	834	970	3.6e-39	IPR002558	I/LWEQ domain	GO:0003779
g5115.t1	1294	PF00373	FERM central domain	199	306	1.2e-22	IPR019748	FERM central domain
g5115.t1	1294	PF09379	FERM N-terminal domain	87	177	9.4e-14	IPR018979	FERM, N-terminal
g5115.t1	1294	PF16511	N-terminal or F0 domain of Talin-head FERM	2	80	5.6e-28	IPR032425	Talin, N-terminal F0 domain
g5115.t1	1294	PF02174	PTB domain (IRS-1 type)	323	390	2.1e-05	IPR002404	IRS-type PTB domain	GO:0005158
g24791.t1	484	PF00759	Glycosyl hydrolase family 9	27	446	2.1e-130	IPR001701	Glycoside hydrolase family 9	GO:0004553|GO:0005975
g2550.t1	334	PF04564	U-box domain	251	323	1.7e-27	IPR003613	U box domain	GO:0004842|GO:0016567
g2550.t1	334	PF13181	Tetratricopeptide repeat	119	144	0.05	IPR019734	Tetratricopeptide repeat	GO:0005515
g27643.t1	730	PF13299	Cleavage and polyadenylation factor 2 C-terminal	591	727	2e-22	IPR025069	Cleavage and polyadenylation specificity factor 2, C-terminal
g27643.t1	730	PF07521	Zn-dependent metallo-hydrolase RNA specificity domain	516	558	5.4e-07	IPR011108	Zn-dependent metallo-hydrolase, RNA specificity domain
g27643.t1	730	PF16661	Metallo-beta-lactamase superfamily domain	22	189	1.5e-58	IPR001279	Metallo-beta-lactamase
g27643.t1	730	PF10996	Beta-Casp domain	243	368	2.1e-23	IPR022712	Beta-Casp domain
g25096.t1	921	PF12529	Xylosyltransferase C terminal	576	749	3.1e-56	IPR024448	Xylosyltransferase	GO:0006024|GO:0030158
g25096.t1	921	PF01822	WSC domain	177	257	4.8e-19	IPR002889	Carbohydrate-binding WSC
g25096.t1	921	PF02485	Core-2/I-Branching enzyme	293	541	9.4e-39	IPR003406	Glycosyl transferase, family 14	GO:0008375|GO:0016020
g27028.t1	1155	PF13181	Tetratricopeptide repeat	359	390	0.017	IPR019734	Tetratricopeptide repeat	GO:0005515
g27028.t1	1155	PF13181	Tetratricopeptide repeat	480	513	0.041	IPR019734	Tetratricopeptide repeat	GO:0005515
g27028.t1	1155	PF13181	Tetratricopeptide repeat	620	650	0.0041	IPR019734	Tetratricopeptide repeat	GO:0005515
g27028.t1	1155	PF00515	Tetratricopeptide repeat	585	617	7.7e-07	IPR001440	Tetratricopeptide repeat 1	GO:0005515
g27028.t1	1155	PF13844	Glycosyl transferase family 41	944	1147	8.8e-70	IPR029489	O-GlcNAc transferase, C-terminal
g27028.t1	1155	PF13844	Glycosyl transferase family 41	749	940	1.8e-64	IPR029489	O-GlcNAc transferase, C-terminal
g27028.t1	1155	PF13414	TPR repeat	419	460	8.9e-07	IPR011990	Tetratricopeptide-like helical domain	GO:0005515
g27028.t1	1155	PF13424	Tetratricopeptide repeat	256	319	6.5e-09
g25862.t1	732	PF00096	Zinc finger, C2H2 type	496	518	1.2e-05	IPR007087	Zinc finger, C2H2	GO:0046872
g25862.t1	732	PF00096	Zinc finger, C2H2 type	384	406	3.4e-06	IPR007087	Zinc finger, C2H2	GO:0046872
g25862.t1	732	PF13912	C2H2-type zinc finger	620	644	0.00095	IPR007087	Zinc finger, C2H2	GO:0046872
g25862.t1	732	PF13912	C2H2-type zinc finger	677	699	0.00072	IPR007087	Zinc finger, C2H2	GO:0046872
g25862.t1	732	PF12874	Zinc-finger of C2H2 type	650	667	0.016
g17410.t1	133	PF05485	THAP domain	5	87	1.5e-14	IPR006612	Zinc finger, C2CH-type	GO:0003676
g1917.t1	372	PF00160	Cyclophilin type peptidyl-prolyl cis-trans isomerase/CLD	18	178	5.9e-45	IPR002130	Cyclophilin-type peptidyl-prolyl cis-trans isomerase domain	GO:0000413|GO:0003755|GO:0006457
g1917.t1	372	PF00515	Tetratricopeptide repeat	309	340	1.6e-09	IPR001440	Tetratricopeptide repeat 1	GO:0005515
g4221.t1	191	PF09339	IclR helix-turn-helix domain	91	123	8.6e-05	IPR005471	Transcription regulator IclR, N-terminal	GO:0003677|GO:0006355
g3434.t1	363	PF14927	Neurensin	176	296	8e-21
g22776.t1	2052	PF02141	DENN (AEX-3) domain	126	308	2.2e-54	IPR001194	DENN domain
g22776.t1	2052	PF06602	Myotubularin-like phosphatase domain	1172	1611	1.1e-84	IPR010569	Myotubularin-like phosphatase domain
g22776.t1	2052	PF03456	uDENN domain	27	85	4.6e-19	IPR005113	uDENN domain
g22776.t1	2052	PF00169	PH domain	1950	2051	7.5e-14	IPR001849	Pleckstrin homology domain
g22776.t1	2052	PF00130	Phorbol esters/diacylglycerol binding domain (C1 domain)	1851	1901	3.1e-12	IPR002219	Protein kinase C-like, phorbol ester/diacylglycerol-binding domain	GO:0035556
g22776.t1	2052	PF12335	Myotubularin protein	546	783	5e-109	IPR022096	SBF1/SBF2 domain
g22776.t1	2052	PF02893	GRAM domain	906	1044	2.5e-15	IPR004182	GRAM domain
g17354.t1	345	PF03175	DNA polymerase type B, organellar and viral	150	317	1.8e-24	IPR004868	DNA-directed DNA polymerase, family B, mitochondria/virus	GO:0000166|GO:0003677|GO:0003887|GO:0006260|GO:0008408
g18015.t1	318	PF12259	Baculovirus F protein	6	317	2.9e-19	IPR022048	Envelope fusion protein-like
g21754.t1	235	PF01151	GNS1/SUR4 family	25	219	2.4e-46	IPR002076	ELO family	GO:0016021
g22413.t1	392	PF03067	Lytic polysaccharide mono-oxygenase, cellulose-degrading	79	270	2.6e-35	IPR004302	Chitin-binding protein, N-terminal
g9084.t2	1097	PF13927	Immunoglobulin domain	405	468	3.7e-11
g9084.t2	1097	PF07679	Immunoglobulin I-set domain	560	659	1.6e-08	IPR013098	Immunoglobulin I-set
g9084.t2	1097	PF07714	Protein tyrosine kinase	782	1056	7.5e-101	IPR001245	Serine-threonine/tyrosine-protein kinase catalytic domain	GO:0004672|GO:0006468
g9084.t2	1097	PF13895	Immunoglobulin domain	175	240	1e-07	IPR007110	Immunoglobulin-like domain	GO:0005515
g9084.t2	1097	PF00047	Immunoglobulin domain	256	336	5.6e-06	IPR013151	Immunoglobulin
g27081.t2	380	PF00627	UBA/TS-N domain	181	215	2.1e-12	IPR015940	Ubiquitin-associated domain
g27081.t2	380	PF00627	UBA/TS-N domain	338	373	1e-11	IPR015940	Ubiquitin-associated domain
g27081.t2	380	PF00240	Ubiquitin family	31	103	2e-21	IPR000626	Ubiquitin domain	GO:0005515
g27081.t2	380	PF09280	XPC-binding domain	256	311	1e-25	IPR015360	XPC-binding domain	GO:0003684|GO:0006289|GO:0043161
g6068.t1	627	PF13193	AMP-binding enzyme C-terminal domain	435	510	3.1e-05	IPR025110	AMP-binding enzyme C-terminal domain
g6068.t1	627	PF00550	Phosphopantetheine attachment site	539	599	7.8e-09	IPR009081	Phosphopantetheine binding ACP domain
g6068.t1	627	PF00501	AMP-binding enzyme	22	426	5.9e-71	IPR000873	AMP-dependent synthetase/ligase	GO:0003824|GO:0008152
g20862.t1	1791	PF04096	Nucleoporin autopeptidase	766	906	2e-37	IPR007230	Peptidase S59, nucleoporin	GO:0005643|GO:0006810
g20862.t1	1791	PF13634	Nucleoporin FG repeat region	236	320	0.25	IPR025574	Nucleoporin FG repeat
g20862.t1	1791	PF13634	Nucleoporin FG repeat region	115	179	5	IPR025574	Nucleoporin FG repeat
g20862.t1	1791	PF13634	Nucleoporin FG repeat region	473	531	1.5	IPR025574	Nucleoporin FG repeat
g20862.t1	1791	PF12110	Nuclear protein 96	1337	1620	2.4e-83	IPR021967	Nuclear protein 96
g5698.t3	1000	PF06512	Sodium ion transport-associated	93	193	3.5e-16	IPR010526	Sodium ion transport-associated	GO:0001518|GO:0005248|GO:0006814
g5698.t3	1000	PF00520	Ion transport protein	328	510	1e-45	IPR005821	Ion transport domain	GO:0005216|GO:0006811|GO:0016020|GO:0055085
g5698.t3	1000	PF00520	Ion transport protein	197	322	1.6e-26	IPR005821	Ion transport domain	GO:0005216|GO:0006811|GO:0016020|GO:0055085
g5698.t3	1000	PF00520	Ion transport protein	561	810	2.7e-53	IPR005821	Ion transport domain	GO:0005216|GO:0006811|GO:0016020|GO:0055085
g909.t1	163	PF10551	MULE transposase domain	22	55	1.5e-06	IPR018289	MULE transposase domain
g3516.t1	794	PF13912	C2H2-type zinc finger	647	671	0.013	IPR007087	Zinc finger, C2H2	GO:0046872
g3516.t1	794	PF13912	C2H2-type zinc finger	470	492	0.016	IPR007087	Zinc finger, C2H2	GO:0046872
g3516.t1	794	PF13912	C2H2-type zinc finger	559	579	0.017	IPR007087	Zinc finger, C2H2	GO:0046872
g3516.t1	794	PF13894	C2H2-type zinc finger	524	547	0.0011
g1664.t1	463	PF00534	Glycosyl transferases group 1	263	422	6.2e-19	IPR001296	Glycosyl transferase, family 1
g1664.t1	463	PF15924	ALG11 mannosyltransferase N-terminus	40	236	5.3e-84	IPR031814	ALG11 mannosyltransferase, N-terminal
g26196.t1	1492	PF01794	Ferric reductase like transmembrane component	1032	1172	4.1e-19	IPR013130	Ferric reductase transmembrane component-like domain
g26196.t1	1492	PF03098	Animal haem peroxidase	27	547	1.7e-148	IPR019791	Haem peroxidase, animal
g26196.t1	1492	PF13499	EF-hand domain pair	848	919	4.6e-07	IPR002048	EF-hand domain	GO:0005509
g26196.t1	1492	PF08030	Ferric reductase NAD binding domain	1317	1472	3.2e-25	IPR013121	Ferric reductase, NAD binding domain	GO:0016491|GO:0055114
g26196.t1	1492	PF08022	FAD-binding domain	1214	1308	5.4e-17	IPR013112	FAD-binding 8	GO:0016491|GO:0055114
g26196.t1	1492	PF13833	EF-hand domain pair	796	836	0.00028	IPR002048	EF-hand domain	GO:0005509
g873.t1	134	PF03184	DDE superfamily endonuclease	2	49	8.3e-11	IPR004875	DDE superfamily endonuclease domain	GO:0003676
g7281.t1	468	PF00536	SAM domain (Sterile alpha motif)	295	349	1e-05	IPR001660	Sterile alpha motif domain	GO:0005515
g7281.t1	468	PF12796	Ankyrin repeats (3 copies)	73	127	3.4e-06	IPR020683	Ankyrin repeat-containing domain
g7281.t1	468	PF12796	Ankyrin repeats (3 copies)	154	238	2e-18	IPR020683	Ankyrin repeat-containing domain
g21498.t1	245	PF00189	Ribosomal protein S3, C-terminal domain	107	189	5.4e-22
g21498.t1	245	PF07650	KH domain	21	94	5.3e-13	IPR004044	K Homology domain, type 2	GO:0003723
g24447.t1	1239	PF00270	DEAD/DEAH box helicase	381	533	4.2e-07	IPR011545	DEAD/DEAH box helicase domain	GO:0003676|GO:0005524
g24447.t1	1239	PF00271	Helicase conserved C-terminal domain	631	758	2.2e-16	IPR001650	Helicase, C-terminal
g24447.t1	1239	PF04408	Helicase associated domain (HA2)	822	896	2.6e-10	IPR007502	Helicase-associated domain	GO:0004386
g24447.t1	1239	PF00035	Double-stranded RNA binding motif	4	69	1.4e-08	IPR014720	Double-stranded RNA-binding domain
g24447.t1	1239	PF07717	Oligonucleotide/oligosaccharide-binding (OB)-fold	981	1066	1.5e-14	IPR011709	Domain of unknown function DUF1605
g1920.t1	162	PF01466	Skp1 family, dimerisation domain	112	159	7.4e-28	IPR016072	SKP1 component, dimerisation	GO:0006511
g1920.t1	162	PF03931	Skp1 family, tetramerisation domain	2	66	7.8e-25	IPR016073	SKP1 component, POZ domain	GO:0006511
g12718.t1	353	PF02800	Glyceraldehyde 3-phosphate dehydrogenase, C-terminal domain	168	318	6.3e-44	IPR020829	Glyceraldehyde 3-phosphate dehydrogenase, catalytic domain	GO:0016620|GO:0055114
g12718.t1	353	PF00044	Glyceraldehyde 3-phosphate dehydrogenase, NAD binding domain	67	123	1e-15	IPR020828	Glyceraldehyde 3-phosphate dehydrogenase, NAD(P) binding domain	GO:0016620|GO:0055114
g20930.t1	387	PF00226	DnaJ domain	315	376	1.9e-13	IPR001623	DnaJ domain
g20930.t1	387	PF05154	TM2 domain	22	71	9.4e-15	IPR007829	TM2 domain
g8740.t1	1093	PF14260	C4-type zinc-finger of DNA polymerase delta	997	1070	3.1e-16	IPR025687	C4-type zinc-finger of DNA polymerase delta
g8740.t1	1093	PF03104	DNA polymerase family B, exonuclease domain	117	465	3.1e-82	IPR006133	DNA-directed DNA polymerase, family B, exonuclease domain	GO:0008408
g8740.t1	1093	PF00136	DNA polymerase family B	523	959	2.9e-150	IPR006134	DNA-directed DNA polymerase, family B, multifunctional domain	GO:0000166|GO:0003677
g25414.t1	918	PF00615	Regulator of G protein signaling domain	171	294	4.1e-13	IPR016137	RGS domain
g25414.t1	918	PF00778	DIX domain	838	914	1.1e-25	IPR001158	DIX domain
g26038.t2	253	PF01762	Galactosyltransferase	138	182	6.7e-05	IPR002659	Glycosyl transferase, family 31	GO:0006486|GO:0008378|GO:0016020
g26038.t2	253	PF01762	Galactosyltransferase	28	123	5.6e-13	IPR002659	Glycosyl transferase, family 31	GO:0006486|GO:0008378|GO:0016020
g23299.t1	493	PF13833	EF-hand domain pair	415	464	2.7e-10	IPR002048	EF-hand domain	GO:0005509
g26672.t1	730	PF06702	Golgi casein kinase, C-terminal, Fam20	524	724	3.5e-72	IPR009581	FAM20, C-terminal
g2011.t1	162	PF00653	Inhibitor of Apoptosis domain	50	119	2.6e-17	IPR001370	BIR repeat
g24735.t1	753	PF14939	DDB1-and CUL4-substrate receptor 15, WD repeat	30	242	4.7e-69	IPR032734	DDB1- and CUL4-associated factor 15, WD40 repeat-containing domain
g19653.t1	316	PF00970	Oxidoreductase FAD-binding domain	59	165	3.6e-33	IPR008333	Oxidoreductase, FAD-binding domain
g19653.t1	316	PF00175	Oxidoreductase NAD-binding domain	192	299	1.4e-34	IPR001433	Oxidoreductase FAD/NAD(P)-binding	GO:0016491|GO:0055114
g13842.t1	253	PF14291	Domain of unknown function (DUF4371)	149	244	4.8e-07	IPR025398	Domain of unknown function DUF4371
g1857.t1	137	PF00046	Homeobox domain	77	121	2.1e-11	IPR001356	Homeobox domain	GO:0003677
g5133.t1	317	PF01112	Asparaginase	7	290	1.5e-80	IPR000246	Peptidase T2, asparaginase 2	GO:0016787
g6625.t1	560	PF07993	Male sterility protein	69	338	1.1e-74	IPR013120	Male sterility, NAD-binding
g6625.t1	560	PF03015	Male sterility protein	412	503	9.5e-26	IPR033640	Fatty acyl-CoA reductase, C-terminal
g24709.t1	509	PF00651	BTB/POZ domain	93	197	2.5e-21	IPR000210	BTB/POZ domain	GO:0005515
g24709.t1	509	PF07707	BTB And C-terminal Kelch	245	306	4.9e-06	IPR011705	BTB/Kelch-associated
g6767.t1	497	PF00169	PH domain	81	174	2.2e-17	IPR001849	Pleckstrin homology domain
g6767.t1	497	PF12796	Ankyrin repeats (3 copies)	390	471	2.5e-10	IPR020683	Ankyrin repeat-containing domain
g6767.t1	497	PF01412	Putative GTPase activating protein for Arf	209	323	1.2e-37	IPR001164	Arf GTPase activating protein	GO:0005096
g2215.t1	170	PF03184	DDE superfamily endonuclease	3	100	6.5e-20	IPR004875	DDE superfamily endonuclease domain	GO:0003676
g26629.t1	638	PF12813	XPG domain containing	118	238	1.1e-07
g26629.t1	638	PF00752	XPG N-terminal domain	1	98	9.8e-07	IPR006085	XPG N-terminal	GO:0004518|GO:0006281
g4433.t1	1672	PF08826	DMPK coiled coil domain like	780	828	0.00015	IPR014930	Myotonic dystrophy protein kinase, coiled coil	GO:0004674|GO:0005524|GO:0006468
g4433.t1	1672	PF00130	Phorbol esters/diacylglycerol binding domain (C1 domain)	919	969	1.1e-12	IPR002219	Protein kinase C-like, phorbol ester/diacylglycerol-binding domain	GO:0035556
g4433.t1	1672	PF15796	KELK-motif containing domain of MRCK Ser/Thr protein kinase	474	551	5.9e-24	IPR031597	KELK-motif containing domain
g4433.t1	1672	PF00069	Protein kinase domain	87	354	5e-54	IPR000719	Protein kinase domain	GO:0004672|GO:0005524|GO:0006468
g4433.t1	1672	PF00780	CNH domain	1141	1407	4.9e-57	IPR001180	Citron homology (CNH) domain
g9880.t1	298	PF05225	helix-turn-helix, Psq domain	18	53	0.00029	IPR007889	DNA binding HTH domain, Psq-type	GO:0003677
g9880.t1	298	PF03184	DDE superfamily endonuclease	214	297	1.7e-05	IPR004875	DDE superfamily endonuclease domain	GO:0003676
g2392.t1	858	PF07714	Protein tyrosine kinase	24	138	1e-32	IPR001245	Serine-threonine/tyrosine-protein kinase catalytic domain	GO:0004672|GO:0006468
g11723.t1	153	PF14291	Domain of unknown function (DUF4371)	1	66	2.7e-10	IPR025398	Domain of unknown function DUF4371
g2242.t1	204	PF08610	Peroxisomal membrane protein (Pex16)	2	196	8.1e-36	IPR013919	Peroxisome membrane protein, Pex16
g3662.t1	478	PF03127	GAT domain	210	286	2.5e-23	IPR004152	GAT domain	GO:0005622|GO:0006886
g3662.t1	478	PF00790	VHS domain	11	152	1.2e-43	IPR002014	VHS domain	GO:0006886
g20533.t1	210	PF08212	Lipocalin-like domain	37	156	1.7e-13	IPR000566	Lipocalin/cytosolic fatty-acid binding domain
g23544.t1	538	PF03730	Ku70/Ku80 C-terminal arm	457	514	7.4e-07	IPR005160	Ku70/Ku80 C-terminal arm	GO:0003677|GO:0004003|GO:0006303
g23544.t1	538	PF02735	Ku70/Ku80 beta-barrel domain	244	443	4.6e-37	IPR006164	Ku70/Ku80 beta-barrel domain	GO:0003677|GO:0006303
g23544.t1	538	PF03731	Ku70/Ku80 N-terminal alpha/beta domain	29	214	1.3e-18	IPR005161	Ku70/Ku80, N-terminal alpha/beta
g4857.t1	467	PF14853	Fis1 C-terminal tetratricopeptide repeat	185	228	3.4e-06	IPR028061	Fis1, C-terminal tetratricopeptide repeat
g4857.t1	467	PF13877	Potential Monad-binding region of RPAP3	351	438	2.9e-14	IPR025986	RNA-polymerase II-associated protein 3-like, C-terminal domain
g11242.t1	459	PF14374	60S ribosomal protein L4 C-terminal domain	277	348	1.4e-22	IPR025755	60S ribosomal protein L4, C-terminal domain
g11242.t1	459	PF00573	Ribosomal protein L4/L1 family	25	263	1.1e-38	IPR002136	Ribosomal protein L4/L1e	GO:0003735|GO:0005840|GO:0006412
g24499.t1	833	PF13855	Leucine rich repeat	216	264	3.9e-07	IPR001611	Leucine-rich repeat	GO:0005515
g24499.t1	833	PF00001	7 transmembrane receptor (rhodopsin family)	411	661	3.1e-25	IPR000276	G protein-coupled receptor, rhodopsin-like	GO:0004930|GO:0007186|GO:0016021
g24499.t1	833	PF13306	Leucine rich repeats (6 copies)	77	138	0.0051	IPR026906	Leucine rich repeat 5
g2587.t1	227	PF00170	bZIP transcription factor	175	220	4.9e-14	IPR004827	Basic-leucine zipper domain	GO:0003700|GO:0006355|GO:0043565
g2587.t1	227	PF03957	Jun-like transcription factor	13	107	9.4e-13	IPR005643	Jun-like transcription factor
g21016.t1	293	PF07716	Basic region leucine zipper	203	255	3.6e-14	IPR004827	Basic-leucine zipper domain	GO:0003700|GO:0006355|GO:0043565
g27272.t1	497	PF10613	Ligated ion channel L-glutamate- and glycine-binding site	356	444	9.1e-29	IPR019594	Ionotropic glutamate receptor, L-glutamate and glycine-binding domain	GO:0004970|GO:0005234|GO:0016020
g8685.t1	296	PF00076	RNA recognition motif. (a.k.a. RRM, RBD, or RNP domain)	35	103	1.4e-17	IPR000504	RNA recognition motif domain	GO:0003676
g8685.t1	296	PF00076	RNA recognition motif. (a.k.a. RRM, RBD, or RNP domain)	115	183	1.4e-15	IPR000504	RNA recognition motif domain	GO:0003676
g23390.t1	460	PF00091	Tubulin/FtsZ family, GTPase domain	8	201	3.8e-39	IPR003008	Tubulin/FtsZ, GTPase domain	GO:0003924
g25882.t1	2607	PF08082	PRO8NT (NUC069), PrP8 N-terminal domain	325	476	2.2e-87	IPR012591	PRO8NT domain	GO:0000398
g25882.t1	2607	PF01398	JAB1/Mov34/MPN/PAD-1 ubiquitin protease	2370	2472	2.9e-08	IPR000555	JAB1/MPN/MOV34 metalloenzyme domain	GO:0005515
g25882.t1	2607	PF08084	PROCT (NUC072) domain	2482	2602	1e-53	IPR012984	PROCT domain
g25882.t1	2607	PF10598	RNA recognition motif of the spliceosomal PrP8	1255	1345	7.2e-47	IPR019582	RNA recognition motif, spliceosomal PrP8	GO:0003723
g25882.t1	2607	PF10596	U6-snRNA interacting domain of PrP8	1711	1869	4e-92	IPR019580	Pre-mRNA-processing-splicing factor 8, U6-snRNA-binding	GO:0017070
g25882.t1	2607	PF12762	ISXO2-like transposase domain	134	219	4.3e-11	IPR024445	ISXO2-like transposase domain
g25882.t1	2607	PF10597	U5-snRNA binding site 2 of PrP8	1480	1612	2.5e-73	IPR019581	Pre-mRNA-processing-splicing factor 8, U5-snRNA-binding	GO:0030623
g25882.t1	2607	PF12134	PRP8 domain IV core	2029	2258	1.4e-129	IPR021983	PRP8 domain IV core
g25882.t1	2607	PF08083	PROCN (NUC071) domain	665	1070	4.2e-235	IPR012592	PROCN domain	GO:0000398
g19929.t1	428	PF00400	WD domain, G-beta repeat	98	135	0.033	IPR001680	WD40 repeat	GO:0005515
g19929.t1	428	PF00400	WD domain, G-beta repeat	250	286	0.002	IPR001680	WD40 repeat	GO:0005515
g19929.t1	428	PF00400	WD domain, G-beta repeat	293	332	0.00022	IPR001680	WD40 repeat	GO:0005515
g19929.t1	428	PF00400	WD domain, G-beta repeat	141	177	7.2e-08	IPR001680	WD40 repeat	GO:0005515
g18072.t1	202	PF00201	UDP-glucoronosyl and UDP-glucosyl transferase	14	200	5e-18	IPR002213	UDP-glucuronosyl/UDP-glucosyltransferase	GO:0008152|GO:0016758
g19546.t2	276	PF00230	Major intrinsic protein	49	262	7.8e-44	IPR000425	Major intrinsic protein	GO:0005215|GO:0006810|GO:0016020
g3740.t1	426	PF00079	Serpin (serine protease inhibitor)	210	419	8.8e-26	IPR023796	Serpin domain
g3740.t1	426	PF00079	Serpin (serine protease inhibitor)	62	177	6.7e-07	IPR023796	Serpin domain
g10798.t1	369	PF01529	DHHC palmitoyltransferase	90	217	4.9e-31	IPR001594	Palmitoyltransferase, DHHC domain
g15277.t1	807	PF14291	Domain of unknown function (DUF4371)	162	396	2.2e-36	IPR025398	Domain of unknown function DUF4371
g15277.t1	807	PF05699	hAT family C-terminal dimerisation region	726	779	1.2e-09	IPR008906	HAT, C-terminal dimerisation domain	GO:0046983
g22171.t1	234	PF01759	UNC-6/NTR/C345C module	121	228	2.3e-29	IPR018933	Netrin module, non-TIMP type
g22171.t1	234	PF00053	Laminin EGF domain	20	62	8.4e-11	IPR002049	Laminin EGF domain
g21793.t1	275	PF08511	COQ9	170	244	2.2e-26	IPR013718	COQ9
g8522.t1	188	PF00858	Amiloride-sensitive sodium channel	7	128	2e-20	IPR001873	Na+ channel, amiloride-sensitive	GO:0005272|GO:0006814|GO:0016020
g20173.t1	1244	PF00569	Zinc finger, ZZ type	895	938	4.4e-16	IPR000433	Zinc finger, ZZ-type	GO:0008270
g20173.t1	1244	PF09068	EF hand	675	793	3.3e-40	IPR015153	EF-hand domain, type 1
g20173.t1	1244	PF00435	Spectrin repeat	508	611	1.4e-07	IPR002017	Spectrin repeat	GO:0005515
g20173.t1	1244	PF09069	EF-hand	797	889	4e-38	IPR015154	EF-hand domain, type 2
g611.t1	532	PF01593	Flavin containing amine oxidoreductase	46	504	9.3e-71	IPR002937	Amine oxidase	GO:0016491|GO:0055114
g24026.t1	937	PF01433	Peptidase family M1	55	448	7.7e-129	IPR014782	Peptidase M1, membrane alanine aminopeptidase, N-terminal	GO:0008237|GO:0008270
g24026.t1	937	PF11838	ERAP1-like C-terminal domain	593	919	5.8e-70	IPR024571	ERAP1-like C-terminal domain
g24279.t1	2193	PF12145	Eukaryotic Mediator 12 subunit domain	286	793	1.4e-185	IPR021990	Mediator complex, subunit Med12, LCEWAV-domain
g24279.t1	2193	PF09497	Transcription mediator complex subunit Med12	101	158	4.3e-16	IPR019035	Mediator complex, subunit Med12	GO:0001104|GO:0006357|GO:0016592
g1122.t1	126	PF05254	Uncharacterised protein family (UPF0203)	45	101	4.4e-19	IPR007918	Mitochondrial distribution/morphology family 35/apoptosis
g22694.t1	698	PF00868	Transglutaminase family	3	124	4.1e-26	IPR001102	Transglutaminase, N-terminal	GO:0018149
g22694.t1	698	PF01841	Transglutaminase-like superfamily	268	361	8.8e-16	IPR002931	Transglutaminase-like
g22694.t1	698	PF00927	Transglutaminase family, C-terminal ig like domain	602	693	9.2e-09	IPR008958	Transglutaminase, C-terminal	GO:0003810|GO:0018149
g22694.t1	698	PF00927	Transglutaminase family, C-terminal ig like domain	497	589	5.2e-14	IPR008958	Transglutaminase, C-terminal	GO:0003810|GO:0018149
g19522.t1	2307	PF04815	Sec23/Sec24 helical domain	2052	2153	4.6e-26	IPR006900	Sec23/Sec24, helical domain	GO:0006886|GO:0006888|GO:0030127
g19522.t1	2307	PF08033	Sec23/Sec24 beta-sandwich domain	1957	2041	4.5e-17	IPR012990	Sec23/Sec24 beta-sandwich
g19522.t1	2307	PF00626	Gelsolin repeat	2181	2233	0.0001	IPR007123	Gelsolin-like domain
g19522.t1	2307	PF04811	Sec23/Sec24 trunk domain	1712	1951	2.7e-61	IPR006896	Sec23/Sec24, trunk domain	GO:0006886|GO:0006888|GO:0030127
g19522.t1	2307	PF04810	Sec23/Sec24 zinc finger	1639	1675	1.2e-12	IPR006895	Zinc finger, Sec23/Sec24-type	GO:0006886|GO:0006888|GO:0008270|GO:0030127
g2695.t1	544	PF00379	Insect cuticle protein	351	405	2.3e-16	IPR000618	Insect cuticle protein	GO:0042302
g26654.t1	126	PF01187	Macrophage migration inhibitory factor (MIF)	2	114	3.4e-27	IPR001398	Macrophage migration inhibitory factor
g22794.t1	473	PF13519	von Willebrand factor type A domain	3	119	2.4e-14	IPR002035	von Willebrand factor, type A
g4477.t1	266	PF13927	Immunoglobulin domain	27	109	6.8e-14
g4860.t1	483	PF00067	Cytochrome P450	29	478	4.1e-101	IPR001128	Cytochrome P450	GO:0005506|GO:0016705|GO:0020037|GO:0055114
g15533.t1	158	PF16064	Domain of unknown function (DUF4806)	34	116	3.2e-15	IPR032071	Domain of unknown function DUF4806
g13897.t1	181	PF13843	Transposase IS4	72	181	2e-22	IPR029526	PiggyBac transposable element-derived protein
g15427.t1	46	PF10545	Alcohol dehydrogenase transcription factor Myb/SANT-like	8	44	1.2e-09	IPR006578	MADF domain
g6705.t1	345	PF04055	Radical SAM superfamily	57	241	1.5e-14	IPR007197	Radical SAM	GO:0003824|GO:0051536
g6705.t1	345	PF13394	4Fe-4S single cluster domain	58	156	6.3e-06
g19119.t1	141	PF10545	Alcohol dehydrogenase transcription factor Myb/SANT-like	91	129	6.6e-08	IPR006578	MADF domain
g12043.t1	401	PF14291	Domain of unknown function (DUF4371)	17	231	1.6e-26	IPR025398	Domain of unknown function DUF4371
g4825.t1	395	PF00743	Flavin-binding monooxygenase-like	2	147	2.1e-29	IPR020946	Flavin monooxygenase-like	GO:0004499|GO:0050660|GO:0050661|GO:0055114
g4825.t1	395	PF00743	Flavin-binding monooxygenase-like	203	301	1.7e-07	IPR020946	Flavin monooxygenase-like	GO:0004499|GO:0050660|GO:0050661|GO:0055114
g21802.t1	729	PF03020	LEM domain	137	172	1.8e-08	IPR003887	LEM domain
g21802.t1	729	PF09402	Man1-Src1p-C-terminal domain	373	585	1.5e-18	IPR018996	Inner nuclear membrane protein MAN1	GO:0005639
g4272.t1	383	PF14604	Variant SH3 domain	330	380	4.3e-18	IPR001452	SH3 domain	GO:0005515
g4272.t1	383	PF14604	Variant SH3 domain	201	249	3.9e-09	IPR001452	SH3 domain	GO:0005515
g4272.t1	383	PF00018	SH3 domain	131	175	3.5e-12	IPR001452	SH3 domain	GO:0005515
g25235.t1	174	PF01253	Translation initiation factor SUI1	89	157	1.8e-18	IPR001950	SUI1 domain	GO:0003743|GO:0006413
g19555.t1	345	PF15295	Coiled-coil domain-containing protein 50 N-terminus	30	114	8.3e-22	IPR029311	Coiled-coil domain-containing protein 50, N-terminal
g10323.t1	337	PF14529	Endonuclease-reverse transcriptase	3	68	2.7e-07	IPR005135	Endonuclease/exonuclease/phosphatase
g25801.t1	605	PF13414	TPR repeat	501	529	1.5e-06	IPR011990	Tetratricopeptide-like helical domain	GO:0005515
g25801.t1	605	PF13431	Tetratricopeptide repeat	327	359	1.2e-05
g8008.t1	468	PF13843	Transposase IS4	103	457	1.8e-83	IPR029526	PiggyBac transposable element-derived protein
g26267.t1	779	PF13925	con80 domain of Katanin	615	774	8.1e-50	IPR028021	Katanin p80 subunit, C-terminal
g26267.t1	779	PF00400	WD domain, G-beta repeat	52	89	0.012	IPR001680	WD40 repeat	GO:0005515
g26267.t1	779	PF00400	WD domain, G-beta repeat	10	47	0.00057	IPR001680	WD40 repeat	GO:0005515
g26267.t1	779	PF00400	WD domain, G-beta repeat	93	133	1.7e-06	IPR001680	WD40 repeat	GO:0005515
g26267.t1	779	PF00400	WD domain, G-beta repeat	139	175	3e-10	IPR001680	WD40 repeat	GO:0005515
g9749.t1	425	PF00096	Zinc finger, C2H2 type	353	375	1.1e-05	IPR007087	Zinc finger, C2H2	GO:0046872
g9749.t1	425	PF00096	Zinc finger, C2H2 type	102	123	1.9e-05	IPR007087	Zinc finger, C2H2	GO:0046872
g9749.t1	425	PF00096	Zinc finger, C2H2 type	241	263	2.9e-06	IPR007087	Zinc finger, C2H2	GO:0046872
g9749.t1	425	PF00096	Zinc finger, C2H2 type	297	319	2.5e-06	IPR007087	Zinc finger, C2H2	GO:0046872
g9749.t1	425	PF00096	Zinc finger, C2H2 type	185	207	4.2e-06	IPR007087	Zinc finger, C2H2	GO:0046872
g9749.t1	425	PF00096	Zinc finger, C2H2 type	45	67	1.6e-06	IPR007087	Zinc finger, C2H2	GO:0046872
g9749.t1	425	PF12874	Zinc-finger of C2H2 type	383	403	0.0012
g9749.t1	425	PF13912	C2H2-type zinc finger	213	235	0.046	IPR007087	Zinc finger, C2H2	GO:0046872
g9749.t1	425	PF13912	C2H2-type zinc finger	325	347	0.039	IPR007087	Zinc finger, C2H2	GO:0046872
g9749.t1	425	PF13912	C2H2-type zinc finger	269	292	0.0085	IPR007087	Zinc finger, C2H2	GO:0046872
g9749.t1	425	PF13912	C2H2-type zinc finger	73	96	0.014	IPR007087	Zinc finger, C2H2	GO:0046872
g9749.t1	425	PF13894	C2H2-type zinc finger	129	151	0.00058
g23900.t1	1216	PF00640	Phosphotyrosine interaction domain (PTB/PID)	1029	1155	2.6e-17	IPR006020	PTB/PI domain	GO:0005515
g23900.t1	1216	PF00023	Ankyrin repeat	49	79	6.1e-05	IPR002110	Ankyrin repeat	GO:0005515
g23900.t1	1216	PF00536	SAM domain (Sterile alpha motif)	860	917	1.3e-12	IPR001660	Sterile alpha motif domain	GO:0005515
g23900.t1	1216	PF12796	Ankyrin repeats (3 copies)	156	253	3.3e-13	IPR020683	Ankyrin repeat-containing domain
g23900.t1	1216	PF12796	Ankyrin repeats (3 copies)	81	148	1.6e-13	IPR020683	Ankyrin repeat-containing domain
g23900.t1	1216	PF07647	SAM domain (Sterile alpha motif)	764	822	3.7e-08	IPR001660	Sterile alpha motif domain	GO:0005515
g20995.t2	497	PF00651	BTB/POZ domain	26	142	2e-11	IPR000210	BTB/POZ domain	GO:0005515
g20995.t2	497	PF07534	TLD	345	490	6.4e-17	IPR006571	TLDc domain
g20995.t2	497	PF07707	BTB And C-terminal Kelch	172	273	6.9e-10	IPR011705	BTB/Kelch-associated
g8440.t1	545	PF13912	C2H2-type zinc finger	420	443	0.00086	IPR007087	Zinc finger, C2H2	GO:0046872
g8440.t1	545	PF00096	Zinc finger, C2H2 type	475	497	2.6e-05	IPR007087	Zinc finger, C2H2	GO:0046872
g21760.t1	225	PF14291	Domain of unknown function (DUF4371)	87	220	8.2e-20	IPR025398	Domain of unknown function DUF4371
g630.t1	353	PF02949	7tm Odorant receptor	72	352	1e-08	IPR004117	Olfactory receptor, insect	GO:0004984|GO:0005549|GO:0007608|GO:0016020
g21656.t1	343	PF00328	Histidine phosphatase superfamily (branch 2)	32	298	1.2e-16	IPR000560	Histidine phosphatase superfamily, clade-2	GO:0003993
g12509.t1	195	PF00098	Zinc knuckle	149	162	0.0043	IPR001878	Zinc finger, CCHC-type	GO:0003676|GO:0008270
g2723.t1	313	PF10545	Alcohol dehydrogenase transcription factor Myb/SANT-like	8	104	5.5e-13	IPR006578	MADF domain
g19073.t1	186	PF13359	DDE superfamily endonuclease	2	106	1e-19	IPR027806	Harbinger transposase-derived nuclease domain
g15691.t1	772	PF14291	Domain of unknown function (DUF4371)	148	386	2.9e-34	IPR025398	Domain of unknown function DUF4371
g22377.t1	855	PF00084	Sushi repeat (SCR repeat)	85	132	0.00085	IPR000436	Sushi/SCR/CCP domain
g22377.t1	855	PF00629	MAM domain, meprin/A5/mu	146	239	4.5e-07	IPR000998	MAM domain	GO:0016020
g20950.t1	104	PF00935	Ribosomal protein L44	18	92	8.2e-34	IPR000552	Ribosomal protein L44e	GO:0003735|GO:0005622|GO:0005840|GO:0006412
g182.t1	379	PF13920	Zinc finger, C3HC4 type (RING finger)	269	299	5.2e-07
g182.t1	379	PF13920	Zinc finger, C3HC4 type (RING finger)	332	370	1.2e-07
g182.t1	379	PF00653	Inhibitor of Apoptosis domain	134	198	1.6e-15	IPR001370	BIR repeat
g182.t1	379	PF00653	Inhibitor of Apoptosis domain	26	89	4.8e-19	IPR001370	BIR repeat
g5396.t1	741	PF01237	Oxysterol-binding protein	346	727	8.7e-134	IPR000648	Oxysterol-binding protein
g21799.t1	2567	PF12777	Microtubule-binding stalk of dynein motor	1584	1904	2e-19	IPR024743	Dynein heavy chain, coiled coil stalk
g21799.t1	2567	PF03028	Dynein heavy chain and region D6 of dynein motor	2445	2566	6.3e-25	IPR004273	Dynein heavy chain domain	GO:0003777|GO:0007018|GO:0030286
g21799.t1	2567	PF03028	Dynein heavy chain and region D6 of dynein motor	2239	2444	2.3e-43	IPR004273	Dynein heavy chain domain	GO:0003777|GO:0007018|GO:0030286
g21799.t1	2567	PF12780	P-loop containing dynein motor region D4	1387	1602	1e-24	IPR024317	Dynein heavy chain, P-loop containing D4 domain
g21799.t1	2567	PF08393	Dynein heavy chain, N-terminal region 2	497	777	2.2e-54	IPR013602	Dynein heavy chain, domain-2
g21799.t1	2567	PF12781	ATP-binding dynein motor region D5	1934	2144	2e-50
g21799.t1	2567	PF12775	P-loop containing dynein motor region D3	1020	1282	1.7e-24
g5431.t1	683	PF02872	5'-nucleotidase, C-terminal domain	345	502	3.1e-38	IPR008334	5'-Nucleotidase, C-terminal	GO:0009166|GO:0016787
g5431.t1	683	PF00149	Calcineurin-like phosphoesterase	73	276	3.6e-11	IPR004843	Calcineurin-like phosphoesterase domain, ApaH type	GO:0016787
g24895.t1	122	PF00049	Insulin/IGF/Relaxin family	30	120	3.5e-12	IPR016179	Insulin-like	GO:0005179|GO:0005576
g8401.t1	120	PF00252	Ribosomal protein L16p/L10e	2	115	6.9e-43	IPR016180	Ribosomal protein L10e/L16	GO:0003735|GO:0005840|GO:0006412
g11583.t1	648	PF14291	Domain of unknown function (DUF4371)	155	388	1e-31	IPR025398	Domain of unknown function DUF4371
g19945.t1	729	PF17207	MCM OB domain	131	266	2.7e-35	IPR033762	MCM OB domain
g19945.t1	729	PF00493	MCM2/3/5 family	316	642	1.7e-133	IPR001208	MCM domain	GO:0003677|GO:0005524|GO:0006260
g19945.t1	729	PF14551	MCM N-terminal domain	32	111	1.9e-16	IPR027925	MCM N-terminal domain
g20527.t1	315	PF08395	7tm Chemosensory receptor	11	291	3.4e-17	IPR013604	7TM chemoreceptor	GO:0016021|GO:0050909
g5887.t1	146	PF05699	hAT family C-terminal dimerisation region	76	126	4.4e-11	IPR008906	HAT, C-terminal dimerisation domain	GO:0046983
g25581.t1	107	PF00487	Fatty acid desaturase	14	74	1.7e-06	IPR005804	Fatty acid desaturase domain	GO:0006629
g6619.t1	97	PF10163	Transcription factor e(y)2	11	81	6.3e-16
g25938.t1	538	PF00479	Glucose-6-phosphate dehydrogenase, NAD binding domain	52	227	3.5e-58	IPR022674	Glucose-6-phosphate dehydrogenase, NAD-binding	GO:0004345|GO:0006006|GO:0050661|GO:0055114
g25938.t1	538	PF02781	Glucose-6-phosphate dehydrogenase, C-terminal domain	229	518	1.3e-114	IPR022675	Glucose-6-phosphate dehydrogenase, C-terminal	GO:0004345|GO:0006006|GO:0050661|GO:0055114
g6366.t2	830	PF00209	Sodium:neurotransmitter symporter family	347	681	1.5e-25	IPR000175	Sodium:neurotransmitter symporter	GO:0005328|GO:0006836|GO:0016021
g6366.t2	830	PF00209	Sodium:neurotransmitter symporter family	198	320	3e-29	IPR000175	Sodium:neurotransmitter symporter	GO:0005328|GO:0006836|GO:0016021
g22035.t1	532	PF03520	KCNQ voltage-gated potassium channel	376	515	2.1e-26	IPR013821	Potassium channel, voltage dependent, KCNQ, C-terminal
g22035.t1	532	PF00520	Ion transport protein	24	250	4.6e-27	IPR005821	Ion transport domain	GO:0005216|GO:0006811|GO:0016020|GO:0055085
g13402.t1	560	PF16071	Domain of unknown function (DUF4812)	495	559	1e-32	IPR032084	Domain of unknown function DUF4812
g8016.t1	476	PF14291	Domain of unknown function (DUF4371)	5	205	3e-28	IPR025398	Domain of unknown function DUF4371
g8016.t1	476	PF05699	hAT family C-terminal dimerisation region	367	452	1.6e-11	IPR008906	HAT, C-terminal dimerisation domain	GO:0046983
g24734.t1	3571	PF00084	Sushi repeat (SCR repeat)	744	799	8.3e-07	IPR000436	Sushi/SCR/CCP domain
g24734.t1	3571	PF00084	Sushi repeat (SCR repeat)	683	739	1.1e-10	IPR000436	Sushi/SCR/CCP domain
g24734.t1	3571	PF00084	Sushi repeat (SCR repeat)	622	678	1.3e-06	IPR000436	Sushi/SCR/CCP domain
g24734.t1	3571	PF00084	Sushi repeat (SCR repeat)	1197	1250	0.0039	IPR000436	Sushi/SCR/CCP domain
g24734.t1	3571	PF00084	Sushi repeat (SCR repeat)	1061	1116	4e-11	IPR000436	Sushi/SCR/CCP domain
g24734.t1	3571	PF07645	Calcium-binding EGF domain	801	833	4.2e-07	IPR001881	EGF-like calcium-binding domain	GO:0005509
g24734.t1	3571	PF00754	F5/8 type C domain	1326	1449	9.5e-08	IPR000421	Coagulation factor 5/8 C-terminal domain
g24734.t1	3571	PF00754	F5/8 type C domain	873	975	1.8e-09	IPR000421	Coagulation factor 5/8 C-terminal domain
g24734.t1	3571	PF13385	Concanavalin A-like lectin/glucanases superfamily	2587	2741	4e-10
g24734.t1	3571	PF00059	Lectin C-type domain	61	176	9.7e-17	IPR001304	C-type lectin-like
g24734.t1	3571	PF14670	Coagulation Factor Xa inhibitory site	998	1027	2.3e-08
g24734.t1	3571	PF00431	CUB domain	218	326	5.7e-18	IPR000859	CUB domain
g24734.t1	3571	PF00431	CUB domain	447	556	7e-13	IPR000859	CUB domain
g24734.t1	3571	PF00431	CUB domain	334	443	7e-20	IPR000859	CUB domain
g24734.t1	3571	PF07699	Putative ephrin-receptor like	3191	3238	3.6e-11	IPR011641	Tyrosine-protein kinase ephrin type A/B receptor-like
g24734.t1	3571	PF07699	Putative ephrin-receptor like	3299	3346	8.6e-14	IPR011641	Tyrosine-protein kinase ephrin type A/B receptor-like
g24734.t1	3571	PF07699	Putative ephrin-receptor like	1926	1976	3.6e-10	IPR011641	Tyrosine-protein kinase ephrin type A/B receptor-like
g24734.t1	3571	PF07699	Putative ephrin-receptor like	1872	1919	4.3e-13	IPR011641	Tyrosine-protein kinase ephrin type A/B receptor-like
g24734.t1	3571	PF07699	Putative ephrin-receptor like	1983	2030	7.8e-12	IPR011641	Tyrosine-protein kinase ephrin type A/B receptor-like
g24734.t1	3571	PF07699	Putative ephrin-receptor like	3252	3291	4.7e-12	IPR011641	Tyrosine-protein kinase ephrin type A/B receptor-like
g24734.t1	3571	PF07699	Putative ephrin-receptor like	3133	3184	7e-11	IPR011641	Tyrosine-protein kinase ephrin type A/B receptor-like
g24734.t1	3571	PF02494	HYR domain	1558	1640	1.5e-08	IPR003410	HYR domain
g24734.t1	3571	PF02494	HYR domain	2804	2884	2e-11	IPR003410	HYR domain
g24734.t1	3571	PF00008	EGF-like domain	2421	2450	5.5e-06	IPR000742	EGF-like domain	GO:0005515
g24734.t1	3571	PF00008	EGF-like domain	2035	2065	1.5e-05	IPR000742	EGF-like domain	GO:0005515
g24734.t1	3571	PF00008	EGF-like domain	2383	2413	2.6e-07	IPR000742	EGF-like domain	GO:0005515
g24734.t1	3571	PF00008	EGF-like domain	2073	2103	3.1e-08	IPR000742	EGF-like domain	GO:0005515
g24734.t1	3571	PF00008	EGF-like domain	2497	2527	1.4e-07	IPR000742	EGF-like domain	GO:0005515
g24734.t1	3571	PF00008	EGF-like domain	2192	2222	6.6e-06	IPR000742	EGF-like domain	GO:0005515
g24734.t1	3571	PF00008	EGF-like domain	2267	2297	1.4e-07	IPR000742	EGF-like domain	GO:0005515
g24734.t1	3571	PF00008	EGF-like domain	2305	2331	1.5e-06	IPR000742	EGF-like domain	GO:0005515
g24734.t1	3571	PF00008	EGF-like domain	2155	2184	5.9e-06	IPR000742	EGF-like domain	GO:0005515
g24734.t1	3571	PF00057	Low-density lipoprotein receptor domain class A	179	214	4.2e-10	IPR002172	Low-density lipoprotein (LDL) receptor class A repeat	GO:0005515
g24734.t1	3571	PF12661	Human growth factor-like EGF	2235	2255	0.049	IPR013032	EGF-like, conserved site
g3327.t1	369	PF12430	Abscisic acid G-protein coupled receptor	191	359	9.2e-41	IPR025969	Abscisic acid G-protein coupled receptor-like domain
g3327.t1	369	PF12537	The Golgi pH Regulator (GPHR) Family N-terminal	63	127	2.1e-23	IPR022535	Golgi pH regulator, conserved domain	GO:0016020
g17019.t1	588	PF14291	Domain of unknown function (DUF4371)	160	394	3.6e-48	IPR025398	Domain of unknown function DUF4371
g10970.t1	631	PF05699	hAT family C-terminal dimerisation region	560	616	2.1e-09	IPR008906	HAT, C-terminal dimerisation domain	GO:0046983
g10970.t1	631	PF14291	Domain of unknown function (DUF4371)	226	307	3.7e-20	IPR025398	Domain of unknown function DUF4371
g10970.t1	631	PF14291	Domain of unknown function (DUF4371)	138	218	2e-08	IPR025398	Domain of unknown function DUF4371
g384.t1	443	PF00415	Regulator of chromosome condensation (RCC1) repeat	280	320	3.4e-05	IPR000408	Regulator of chromosome condensation, RCC1
g384.t1	443	PF00415	Regulator of chromosome condensation (RCC1) repeat	173	223	4.9e-06	IPR000408	Regulator of chromosome condensation, RCC1
g384.t1	443	PF00415	Regulator of chromosome condensation (RCC1) repeat	227	276	1.2e-07	IPR000408	Regulator of chromosome condensation, RCC1
g384.t1	443	PF00415	Regulator of chromosome condensation (RCC1) repeat	51	103	2.1e-06	IPR000408	Regulator of chromosome condensation, RCC1
g384.t1	443	PF00415	Regulator of chromosome condensation (RCC1) repeat	391	438	2.2e-13	IPR000408	Regulator of chromosome condensation, RCC1
g3061.t1	345	PF08772	Nin one binding (NOB1) Zn-ribbon like	197	268	1.4e-27	IPR014881	Nin one binding (NOB1) Zn-ribbon-like
g3061.t1	345	PF17146	PIN domain of ribonuclease	7	93	4.4e-27	IPR033411	Ribonuclease, PIN domain
g8917.t1	1623	PF03142	Chitin synthase	809	1048	7.8e-26
g46.t1	492	PF00006	ATP synthase alpha/beta family, nucleotide-binding domain	152	379	3.4e-68	IPR000194	ATPase, F1/V1/A1 complex, alpha/beta subunit, nucleotide-binding domain	GO:0005524
g46.t1	492	PF02874	ATP synthase alpha/beta family, beta-barrel domain	29	95	5.6e-12	IPR004100	ATPase, F1/V1/A1 complex, alpha/beta subunit, N-terminal domain	GO:0015992|GO:0046034
g22948.t1	1005	PF00689	Cation transporting ATPase, C-terminus	781	989	3.3e-42	IPR006068	Cation-transporting P-type ATPase, C-terminal
g22948.t1	1005	PF00122	E1-E2 ATPase	119	349	1.1e-52	IPR008250	P-type ATPase, A domain	GO:0000166|GO:0046872
g22948.t1	1005	PF00690	Cation transporter/ATPase, N-terminus	28	95	5.4e-17	IPR004014	Cation-transporting P-type ATPase, N-terminal
g22948.t1	1005	PF13246	Cation transport ATPase (P-type)	411	502	1.8e-23
g1819.t1	1804	PF13848	Thioredoxin-like domain	1597	1739	1.7e-06
g1819.t1	1804	PF13848	Thioredoxin-like domain	733	855	1.9e-06
g1819.t1	1804	PF13848	Thioredoxin-like domain	537	685	2.9e-07
g1819.t1	1804	PF00085	Thioredoxin	1443	1522	2.7e-05	IPR013766	Thioredoxin domain	GO:0045454
g1819.t1	1804	PF00085	Thioredoxin	60	147	8.3e-05	IPR013766	Thioredoxin domain	GO:0045454
g1819.t1	1804	PF00085	Thioredoxin	1127	1219	3.5e-08	IPR013766	Thioredoxin domain	GO:0045454
g26560.t1	197	PF12171	Zinc-finger double-stranded RNA-binding	78	103	5.8e-07	IPR022755	Zinc finger, double-stranded RNA binding
g9797.t1	123	PF10320	Serpentine type 7TM GPCR chemoreceptor Srsx	9	113	5.6e-05	IPR019424	Serpentine type 7TM GPCR chemoreceptor Srsx
g14459.t1	120	PF10545	Alcohol dehydrogenase transcription factor Myb/SANT-like	12	103	1.6e-19	IPR006578	MADF domain
g4064.t1	130	PF00410	Ribosomal protein S8	6	129	6.1e-22	IPR000630	Ribosomal protein S8	GO:0003735|GO:0005840|GO:0006412
g20681.t1	260	PF01094	Receptor family ligand binding region	47	174	1.5e-23	IPR001828	Receptor, ligand binding region
g4324.t2	1845	PF16641	CLIP1 zinc knuckle	1780	1797	1.9e-06	IPR032108	CLIP1, zinc knuckle
g4324.t2	1845	PF01302	CAP-Gly domain	143	206	9.5e-20	IPR000938	CAP Gly-rich domain
g4324.t2	1845	PF01302	CAP-Gly domain	268	335	1.3e-20	IPR000938	CAP Gly-rich domain
g22298.t1	357	PF03803	Scramblase	123	345	1e-82	IPR005552	Scramblase
g5388.t1	745	PF01833	IPT/TIG domain	377	446	4.9e-05	IPR002909	IPT domain	GO:0005515
g24058.t1	1011	PF01433	Peptidase family M1	73	455	8.4e-120	IPR014782	Peptidase M1, membrane alanine aminopeptidase, N-terminal	GO:0008237|GO:0008270
g24058.t1	1011	PF11838	ERAP1-like C-terminal domain	592	905	1.5e-61	IPR024571	ERAP1-like C-terminal domain
g27380.t1	284	PF00795	Carbon-nitrogen hydrolase	10	255	6.6e-58	IPR003010	Carbon-nitrogen hydrolase	GO:0006807|GO:0016810
g22057.t1	1036	PF08264	Anticodon-binding domain of tRNA	755	908	1.8e-40	IPR013155	Methionyl/Valyl/Leucyl/Isoleucyl-tRNA synthetase, anticodon-binding	GO:0000166|GO:0006418
g22057.t1	1036	PF10458	Valyl tRNA synthetase tRNA binding arm	967	1031	1.1e-06	IPR019499	Valyl-tRNA synthetase, tRNA-binding arm	GO:0000166|GO:0004832|GO:0005524|GO:0005737|GO:0006438
g22057.t1	1036	PF00133	tRNA synthetases class I (I, L, M and V)	85	711	1.8e-206	IPR002300	Aminoacyl-tRNA synthetase, class Ia	GO:0000166|GO:0004812|GO:0005524|GO:0006418
g21975.t1	385	PF03798	TLC domain	118	267	2.2e-11	IPR006634	TRAM/LAG1/CLN8 homology domain	GO:0016021
g21975.t1	385	PF08390	TRAM1-like protein	52	115	9.2e-18	IPR013599	TRAM1-like protein
g4309.t1	453	PF00400	WD domain, G-beta repeat	120	156	1.1e-06	IPR001680	WD40 repeat	GO:0005515
g4309.t1	453	PF00400	WD domain, G-beta repeat	61	93	2.6e-05	IPR001680	WD40 repeat	GO:0005515
g4309.t1	453	PF00400	WD domain, G-beta repeat	164	198	0.061	IPR001680	WD40 repeat	GO:0005515
g4309.t1	453	PF00400	WD domain, G-beta repeat	348	375	0.16	IPR001680	WD40 repeat	GO:0005515
g23835.t1	1143	PF00271	Helicase conserved C-terminal domain	622	727	1e-17	IPR001650	Helicase, C-terminal
g23835.t1	1143	PF16124	RecQ zinc-binding	739	810	2.8e-14	IPR032284	ATP-dependent DNA helicase RecQ, zinc-binding domain
g23835.t1	1143	PF00270	DEAD/DEAH box helicase	415	583	1.4e-19	IPR011545	DEAD/DEAH box helicase domain	GO:0003676|GO:0005524
g23835.t1	1143	PF09382	RQC domain	816	935	1.7e-21	IPR018982	RQC domain	GO:0006260|GO:0006281|GO:0043140
g23835.t1	1143	PF00570	HRDC domain	961	1026	2.2e-13	IPR002121	HRDC domain	GO:0003676|GO:0005622
g9372.t1	716	PF00856	SET domain	338	392	3.6e-08	IPR001214	SET domain	GO:0005515
g9372.t1	716	PF00096	Zinc finger, C2H2 type	115	136	2.2e-05	IPR007087	Zinc finger, C2H2	GO:0046872
g3815.t1	800	PF11831	pre-mRNA splicing factor component	401	652	1.1e-73	IPR021786	Pre-mRNA splicing factor component Cdc5p/Cef1
g3815.t1	800	PF13921	Myb-like DNA-binding domain	11	71	1.4e-13
g3815.t1	800	PF09316	C-myb, C-terminal	392	446	4.5e-06	IPR015395	C-myb, C-terminal
g1720.t1	866	PF10254	PACS-1 cytosolic sorting protein	454	833	7e-128	IPR019381	Phosphofurin acidic cluster sorting protein 1
g27117.t1	295	PF01433	Peptidase family M1	48	103	2.6e-06	IPR014782	Peptidase M1, membrane alanine aminopeptidase, N-terminal	GO:0008237|GO:0008270
g27117.t1	295	PF11838	ERAP1-like C-terminal domain	121	293	2.3e-20	IPR024571	ERAP1-like C-terminal domain
g19294.t1	473	PF17039	Fucosyltransferase, N-terminal	114	191	1.4e-17	IPR031481	Fucosyltransferase, N-terminal
g19294.t1	473	PF00852	Glycosyltransferase family 10 (fucosyltransferase) C-term	212	387	3.5e-63	IPR001503	Glycosyl transferase family 10	GO:0006486|GO:0008417|GO:0016020
g22664.t1	927	PF00169	PH domain	362	463	2.5e-13	IPR001849	Pleckstrin homology domain
g22664.t1	927	PF00168	C2 domain	483	579	5.6e-12	IPR000008	C2 domain	GO:0005515
g22664.t1	927	PF00018	SH3 domain	165	211	1.4e-09	IPR001452	SH3 domain	GO:0005515
g22664.t1	927	PF00017	SH2 domain	231	304	1.5e-14	IPR000980	SH2 domain
g22664.t1	927	PF00017	SH2 domain	62	136	9.5e-18	IPR000980	SH2 domain
g22664.t1	927	PF00616	GTPase-activator protein for Ras-like GTPase	728	827	2.6e-16	IPR001936	Ras GTPase-activating protein	GO:0043087
g27432.t1	3501	PF12780	P-loop containing dynein motor region D4	1832	2108	1.6e-73	IPR024317	Dynein heavy chain, P-loop containing D4 domain
g27432.t1	3501	PF12777	Microtubule-binding stalk of dynein motor	2123	2419	8.8e-39	IPR024743	Dynein heavy chain, coiled coil stalk
g27432.t1	3501	PF12775	P-loop containing dynein motor region D3	1482	1747	5.5e-61
g27432.t1	3501	PF12781	ATP-binding dynein motor region D5	2450	2670	7.8e-77
g27432.t1	3501	PF12774	Hydrolytic ATP binding site of dynein motor region D1	863	1091	2.2e-92
g27432.t1	3501	PF03028	Dynein heavy chain and region D6 of dynein motor	2812	3497	3.3e-240	IPR004273	Dynein heavy chain domain	GO:0003777|GO:0007018|GO:0030286
g27432.t1	3501	PF08393	Dynein heavy chain, N-terminal region 2	325	723	2.3e-109	IPR013602	Dynein heavy chain, domain-2
g27432.t1	3501	PF07728	AAA domain (dynein-related subfamily)	1177	1319	6e-07	IPR011704	ATPase, dynein-related, AAA domain	GO:0005524|GO:0016887
g24769.t1	597	PF13920	Zinc finger, C3HC4 type (RING finger)	545	592	8.2e-13
g24769.t1	597	PF07177	Neuralized	268	416	4.6e-35	IPR006573	Neuralized homology repeat (NHR) domain
g24769.t1	597	PF07177	Neuralized	72	220	3.1e-47	IPR006573	Neuralized homology repeat (NHR) domain
g26427.t1	312	PF10148	Schwannomin-interacting protein 1	193	306	4.1e-34	IPR015649	Schwannomin interacting protein 1
g26427.t1	312	PF10148	Schwannomin-interacting protein 1	132	213	6e-13	IPR015649	Schwannomin interacting protein 1
g3956.t1	397	PF03221	Tc5 transposase DNA-binding domain	73	131	2.8e-16	IPR006600	HTH CenpB-type DNA-binding domain
g3956.t1	397	PF03184	DDE superfamily endonuclease	186	219	0.00018	IPR004875	DDE superfamily endonuclease domain	GO:0003676
g3956.t1	397	PF04218	CENP-B N-terminal DNA-binding domain	11	55	1.4e-09	IPR007889	DNA binding HTH domain, Psq-type	GO:0003677
g12034.t1	294	PF17039	Fucosyltransferase, N-terminal	113	191	1.9e-15	IPR031481	Fucosyltransferase, N-terminal
g12034.t1	294	PF00852	Glycosyltransferase family 10 (fucosyltransferase) C-term	212	293	2.4e-28	IPR001503	Glycosyl transferase family 10	GO:0006486|GO:0008417|GO:0016020
g4017.t1	544	PF13920	Zinc finger, C3HC4 type (RING finger)	487	533	2.6e-07
g4017.t1	544	PF04500	FLYWCH zinc finger domain	4	48	3.5e-06	IPR007588	Zinc finger, FLYWCH-type
g4017.t1	544	PF10551	MULE transposase domain	158	252	2.2e-10	IPR018289	MULE transposase domain
g15875.t1	114	PF03221	Tc5 transposase DNA-binding domain	63	114	1.4e-11	IPR006600	HTH CenpB-type DNA-binding domain
g15875.t1	114	PF04218	CENP-B N-terminal DNA-binding domain	2	46	3e-08	IPR007889	DNA binding HTH domain, Psq-type	GO:0003677
g18555.t1	71	PF01204	Trehalase	3	70	3.8e-16	IPR001661	Glycoside hydrolase, family 37	GO:0004555|GO:0005991
g27038.t1	192	PF06553	BNIP3	7	185	7.5e-58	IPR010548	BNIP3	GO:0005740|GO:0016021|GO:0043065
g15824.t1	93	PF02958	Ecdysteroid kinase	36	93	0.0002	IPR004119	Protein of unknown function DUF227
g7226.t1	475	PF15494	Scavenger receptor cysteine-rich domain	109	205	2.8e-07	IPR017448	SRCR-like domain	GO:0016020
g7226.t1	475	PF00057	Low-density lipoprotein receptor domain class A	67	95	1.5e-05	IPR002172	Low-density lipoprotein (LDL) receptor class A repeat	GO:0005515
g7226.t1	475	PF00089	Trypsin	217	458	5.9e-60	IPR001254	Serine proteases, trypsin domain	GO:0004252|GO:0006508
g17002.t1	221	PF05699	hAT family C-terminal dimerisation region	140	189	8e-08	IPR008906	HAT, C-terminal dimerisation domain	GO:0046983
g1989.t1	984	PF01979	Amidohydrolase family	221	550	1e-09	IPR006680	Amidohydrolase-related	GO:0016787
g1989.t1	984	PF02729	Aspartate/ornithine carbamoyltransferase, carbamoyl-P binding domain	683	824	4.8e-46	IPR006132	Aspartate/ornithine carbamoyltransferase, carbamoyl-P binding	GO:0006520|GO:0016743
g1989.t1	984	PF02142	MGS-like domain	81	185	2.7e-11	IPR011607	Methylglyoxal synthase-like domain
g1989.t1	984	PF00185	Aspartate/ornithine carbamoyltransferase, Asp/Orn binding domain	831	979	1e-31	IPR006131	Aspartate/ornithine carbamoyltransferase, Asp/Orn-binding domain	GO:0006520|GO:0016597|GO:0016743
g27692.t1	574	PF00412	LIM domain	198	253	2.3e-14	IPR001781	Zinc finger, LIM-type	GO:0008270
g27692.t1	574	PF00412	LIM domain	260	316	6e-15	IPR001781	Zinc finger, LIM-type	GO:0008270
g27692.t1	574	PF00046	Homeobox domain	449	505	6.6e-19	IPR001356	Homeobox domain	GO:0003677
g27354.t1	294	PF11721	Di-glucose binding within endoplasmic reticulum	46	205	8.9e-40	IPR021720	Malectin
g25607.t1	127	PF10545	Alcohol dehydrogenase transcription factor Myb/SANT-like	9	94	1.2e-16	IPR006578	MADF domain
g27166.t1	962	PF00084	Sushi repeat (SCR repeat)	628	667	1.9e-08	IPR000436	Sushi/SCR/CCP domain
g27166.t1	962	PF00084	Sushi repeat (SCR repeat)	533	588	1.8e-06	IPR000436	Sushi/SCR/CCP domain
g27166.t1	962	PF00084	Sushi repeat (SCR repeat)	354	408	4.4e-07	IPR000436	Sushi/SCR/CCP domain
g27166.t1	962	PF00084	Sushi repeat (SCR repeat)	790	845	1.5e-09	IPR000436	Sushi/SCR/CCP domain
g27166.t1	962	PF00084	Sushi repeat (SCR repeat)	248	287	3.1e-07	IPR000436	Sushi/SCR/CCP domain
g27166.t1	962	PF00084	Sushi repeat (SCR repeat)	672	727	1.2e-11	IPR000436	Sushi/SCR/CCP domain
g27166.t1	962	PF00084	Sushi repeat (SCR repeat)	746	785	0.00039	IPR000436	Sushi/SCR/CCP domain
g27166.t1	962	PF00084	Sushi repeat (SCR repeat)	292	349	3.4e-12	IPR000436	Sushi/SCR/CCP domain
g27166.t1	962	PF00084	Sushi repeat (SCR repeat)	475	528	1.5e-09	IPR000436	Sushi/SCR/CCP domain
g27166.t1	962	PF00084	Sushi repeat (SCR repeat)	413	470	6.2e-07	IPR000436	Sushi/SCR/CCP domain
g27166.t1	962	PF00059	Lectin C-type domain	115	227	1.4e-10	IPR001304	C-type lectin-like
g18070.t1	104	PF10545	Alcohol dehydrogenase transcription factor Myb/SANT-like	18	90	4.5e-12	IPR006578	MADF domain
g17590.t1	297	PF13873	Myb/SANT-like DNA-binding domain	8	85	4e-17	IPR028002	Myb/SANT-like DNA-binding domain
g7248.t1	595	PF13181	Tetratricopeptide repeat	84	114	0.00081	IPR019734	Tetratricopeptide repeat	GO:0005515
g7248.t1	595	PF12569	NMDA receptor-regulated protein 1	187	582	2.2e-168	IPR021183	N-terminal acetyltransferase A, auxiliary subunit
g21622.t1	941	PF00046	Homeobox domain	799	855	2.7e-22	IPR001356	Homeobox domain	GO:0003677
g21622.t1	941	PF10557	Cullin protein neddylation domain	644	704	1.4e-24	IPR019559	Cullin protein, neddylation domain
g21622.t1	941	PF00888	Cullin family	14	410	4.8e-81	IPR001373	Cullin, N-terminal	GO:0006511|GO:0031625
g21622.t1	941	PF00888	Cullin family	410	610	3.2e-66	IPR001373	Cullin, N-terminal	GO:0006511|GO:0031625
g7864.t2	377	PF01529	DHHC palmitoyltransferase	132	256	1.5e-39	IPR001594	Palmitoyltransferase, DHHC domain
g27353.t2	781	PF15230	Serine/arginine repetitive matrix protein C-terminus	691	756	4.7e-12	IPR029360	Serine/arginine repetitive matrix protein, C-terminal
g23148.t1	521	PF08368	FAST kinase-like protein, subdomain 2	356	439	1.2e-16	IPR013579	FAST kinase-like protein, subdomain 2
g23148.t1	521	PF06743	FAST kinase-like protein, subdomain 1	277	342	7.5e-13	IPR010622	FAST kinase leucine-rich	GO:0004672
g21038.t1	158	PF03184	DDE superfamily endonuclease	91	157	2.1e-14	IPR004875	DDE superfamily endonuclease domain	GO:0003676
g2727.t1	583	PF07898	Protein of unknown function (DUF1676)	138	271	1.7e-09	IPR012464	Protein of unknown function DUF1676
g2727.t1	583	PF07841	DM4/DM12 family	406	492	3.6e-05	IPR006631	Protein of unknown function DM4/12
g25068.t1	1281	PF03456	uDENN domain	62	127	5.1e-19	IPR005113	uDENN domain
g25068.t1	1281	PF02141	DENN (AEX-3) domain	204	429	2.9e-30	IPR001194	DENN domain
g21297.t1	138	PF00253	Ribosomal protein S14p/S29e	86	136	2e-19	IPR001209	Ribosomal protein S14	GO:0003735|GO:0005622|GO:0005840|GO:0006412
g25149.t1	315	PF01370	NAD dependent epimerase/dehydratase family	16	232	5.6e-17	IPR001509	NAD-dependent epimerase/dehydratase	GO:0003824|GO:0050662
g25149.t1	315	PF08338	Domain of unknown function (DUF1731)	266	310	3.4e-13	IPR013549	Domain of unknown function DUF1731
g25637.t1	805	PF04615	Utp14 protein	9	795	7.1e-140	IPR006709	Small-subunit processome, Utp14	GO:0006364|GO:0032040
g2535.t2	571	PF16563	Coiled-coil and interaction region of P66A and P66B with MBD2	102	139	2.5e-12	IPR032346	Transcriptional repressor p66, coiled-coil MBD2-interaction domain
g12513.t1	253	PF14529	Endonuclease-reverse transcriptase	5	111	2e-16	IPR005135	Endonuclease/exonuclease/phosphatase
g1010.t1	856	PF08264	Anticodon-binding domain of tRNA	667	768	2.1e-07	IPR013155	Methionyl/Valyl/Leucyl/Isoleucyl-tRNA synthetase, anticodon-binding	GO:0000166|GO:0006418
g1010.t1	856	PF09334	tRNA synthetases class I (M)	50	187	8.8e-22	IPR015413	Methionyl/Leucyl tRNA synthetase	GO:0000166|GO:0004812|GO:0005524|GO:0006418
g1010.t1	856	PF00133	tRNA synthetases class I (I, L, M and V)	376	536	2e-10	IPR002300	Aminoacyl-tRNA synthetase, class Ia	GO:0000166|GO:0004812|GO:0005524|GO:0006418
g3664.t1	602	PF14966	DNA repair REX1-B	476	550	4e-07
g3664.t1	602	PF04597	Ribophorin I	28	448	2.1e-133	IPR007676	Ribophorin I	GO:0004579|GO:0005783|GO:0006486|GO:0016021
g5695.t1	1118	PF00069	Protein kinase domain	836	1040	9.4e-19	IPR000719	Protein kinase domain	GO:0004672|GO:0005524|GO:0006468
g5695.t1	1118	PF08311	Mad3/BUB1 homology region 1	62	183	5.4e-37	IPR013212	Mad3/Bub1 homology region 1
g3025.t1	615	PF04084	Origin recognition complex subunit 2	294	594	9.7e-86	IPR007220	Origin recognition complex, subunit 2	GO:0000808|GO:0005634|GO:0006260
g15879.t1	113	PF01204	Trehalase	2	97	2.2e-31	IPR001661	Glycoside hydrolase, family 37	GO:0004555|GO:0005991
g3054.t1	107	PF00085	Thioredoxin	64	104	1.1e-07	IPR013766	Thioredoxin domain	GO:0045454
g25178.t1	1109	PF12756	C2H2 type zinc-finger (2 copies)	355	388	0.00019	IPR015880	Zinc finger, C2H2-like
g25178.t1	1109	PF13912	C2H2-type zinc finger	438	462	0.021	IPR007087	Zinc finger, C2H2	GO:0046872
g25178.t1	1109	PF13912	C2H2-type zinc finger	277	296	0.069	IPR007087	Zinc finger, C2H2	GO:0046872
g6771.t1	601	PF01061	ABC-2 type transporter	330	536	4.7e-38	IPR013525	ABC-2 type transporter	GO:0016020
g6771.t1	601	PF00005	ABC transporter	37	183	5.8e-26	IPR003439	ABC transporter-like	GO:0005524|GO:0016887
g1327.t1	759	PF00654	Voltage gated chloride channel	136	541	1.1e-91	IPR001807	Chloride channel, voltage gated	GO:0005247|GO:0006821|GO:0016020|GO:0055085
g1327.t1	759	PF00571	CBS domain	689	739	9.1e-07	IPR000644	CBS domain
g1327.t1	759	PF00571	CBS domain	575	640	0.00052	IPR000644	CBS domain
g2878.t1	167	PF12017	Transposase protein	67	166	1.4e-09	IPR021896	Transposase protein	GO:0004803|GO:0006313
g25762.t1	214	PF04968	CHORD	148	208	5.4e-26	IPR007051	CHORD domain
g25762.t1	214	PF04968	CHORD	8	68	1.5e-25	IPR007051	CHORD domain
g5977.t1	713	PF00394	Multicopper oxidase	208	360	4.3e-29	IPR001117	Multicopper oxidase, type 1	GO:0055114
g5977.t1	713	PF07732	Multicopper oxidase	84	195	2.1e-37	IPR011707	Multicopper oxidase, type 3	GO:0005507
g5977.t1	713	PF07731	Multicopper oxidase	483	612	2.1e-32	IPR011706	Multicopper oxidase, type 2	GO:0005507|GO:0016491|GO:0055114
g719.t1	946	PF00630	Filamin/ABP280 repeat	539	623	3.6e-16	IPR017868	Filamin/ABP280 repeat-like
g719.t1	946	PF00630	Filamin/ABP280 repeat	344	430	1.4e-17	IPR017868	Filamin/ABP280 repeat-like
g719.t1	946	PF00630	Filamin/ABP280 repeat	100	155	2.4e-09	IPR017868	Filamin/ABP280 repeat-like
g719.t1	946	PF00630	Filamin/ABP280 repeat	726	811	3.4e-12	IPR017868	Filamin/ABP280 repeat-like
g719.t1	946	PF00630	Filamin/ABP280 repeat	856	943	2.6e-10	IPR017868	Filamin/ABP280 repeat-like
g719.t1	946	PF00630	Filamin/ABP280 repeat	646	718	4.9e-08	IPR017868	Filamin/ABP280 repeat-like
g719.t1	946	PF00630	Filamin/ABP280 repeat	164	247	1.1e-19	IPR017868	Filamin/ABP280 repeat-like
g719.t1	946	PF00630	Filamin/ABP280 repeat	486	528	3.5e-07	IPR017868	Filamin/ABP280 repeat-like
g2528.t1	1055	PF16212	Phospholipid-translocating P-type ATPase C-terminal	800	1047	4.5e-65	IPR032630	P-type ATPase, C-terminal
g2528.t1	1055	PF16209	Phospholipid-translocating ATPase N-terminal	36	97	1.5e-17	IPR032631	P-type ATPase, N-terminal
g2528.t1	1055	PF13246	Cation transport ATPase (P-type)	474	554	2.5e-10
g2528.t1	1055	PF00122	E1-E2 ATPase	125	345	1.1e-08	IPR008250	P-type ATPase, A domain	GO:0000166|GO:0046872
g466.t1	166	PF00366	Ribosomal protein S17	25	82	1.8e-07	IPR000266	Ribosomal protein S17/S11	GO:0003735|GO:0005622|GO:0005840|GO:0006412
g7844.t1	86	PF13551	Winged helix-turn helix	8	64	4.4e-08
g3721.t1	753	PF00096	Zinc finger, C2H2 type	340	362	4.5e-06	IPR007087	Zinc finger, C2H2	GO:0046872
g3721.t1	753	PF13912	C2H2-type zinc finger	190	213	0.01	IPR007087	Zinc finger, C2H2	GO:0046872
g3721.t1	753	PF13912	C2H2-type zinc finger	570	593	0.031	IPR007087	Zinc finger, C2H2	GO:0046872
g3721.t1	753	PF13894	C2H2-type zinc finger	400	422	0.0013
g3721.t1	753	PF12874	Zinc-finger of C2H2 type	280	301	0.062
g16100.t1	275	PF10545	Alcohol dehydrogenase transcription factor Myb/SANT-like	14	95	1.7e-19	IPR006578	MADF domain
g16100.t1	275	PF02944	BESS motif	186	215	1.8e-05	IPR004210	BESS motif	GO:0003677
g11208.t1	162	PF14291	Domain of unknown function (DUF4371)	65	160	1.2e-05	IPR025398	Domain of unknown function DUF4371
g8578.t1	268	PF01344	Kelch motif	220	265	5.2e-14	IPR006652	Kelch repeat type 1	GO:0005515
g8578.t1	268	PF01344	Kelch motif	183	211	2.4e-05	IPR006652	Kelch repeat type 1	GO:0005515
g8578.t1	268	PF07707	BTB And C-terminal Kelch	32	134	5.6e-21	IPR011705	BTB/Kelch-associated
g1041.t1	127	PF00078	Reverse transcriptase (RNA-dependent DNA polymerase)	2	97	1.2e-08	IPR000477	Reverse transcriptase domain
g7865.t1	345	PF00112	Papain family cysteine protease	91	340	1.2e-61	IPR000668	Peptidase C1A, papain C-terminal	GO:0006508|GO:0008234
g7865.t1	345	PF08127	Peptidase family C1 propeptide	32	70	8e-17	IPR012599	Peptidase C1A, propeptide	GO:0004197|GO:0050790
g25277.t1	153	PF02996	Prefoldin subunit	30	151	4.6e-15	IPR004127	Prefoldin alpha-like
g20944.t1	165	PF14886	FAM183A and FAM183B related	44	136	2.7e-13	IPR029214	FAM183 family
g27.t1	883	PF07524	Bromodomain associated	4	72	8.6e-10	IPR006565	Bromodomain associated domain
g27.t1	883	PF00628	PHD-finger	811	856	7.4e-07	IPR019787	Zinc finger, PHD-finger	GO:0005515
g18146.t1	256	PF14291	Domain of unknown function (DUF4371)	22	251	1.2e-31	IPR025398	Domain of unknown function DUF4371
g16739.t1	31	PF01042	Endoribonuclease L-PSP	4	30	1.3e-07	IPR006175	YjgF/YER057c/UK114 family
g22599.t2	278	PF04845	PurA ssDNA and RNA-binding protein	34	250	2.5e-98	IPR006628	Purine-rich element binding protein family
g2360.t1	228	PF13419	Haloacid dehalogenase-like hydrolase	10	194	9.9e-24	IPR023214	HAD-like domain
g6645.t1	920	PF13855	Leucine rich repeat	104	161	3.2e-14	IPR001611	Leucine-rich repeat	GO:0005515
g12530.t1	350	PF13843	Transposase IS4	125	348	1.4e-53	IPR029526	PiggyBac transposable element-derived protein
g1952.t2	1082	PF02037	SAP domain	602	634	2.7e-12	IPR003034	SAP domain
g1952.t2	1082	PF02755	RPEL repeat	273	294	6.5e-07	IPR004018	RPEL repeat
g1952.t2	1082	PF02755	RPEL repeat	317	340	3e-07	IPR004018	RPEL repeat
g21326.t1	251	PF00076	RNA recognition motif. (a.k.a. RRM, RBD, or RNP domain)	35	99	1.1e-16	IPR000504	RNA recognition motif domain	GO:0003676
g17975.t1	201	PF00749	tRNA synthetases class I (E and Q), catalytic domain	5	181	5.9e-57	IPR020058	Glutamyl/glutaminyl-tRNA synthetase, class Ib, catalytic domain	GO:0005524|GO:0016876|GO:0043039
g1565.t1	555	PF04495	GRASP55/65 PDZ-like domain	69	204	2.5e-52	IPR024958	GRASP55/65 PDZ-like domain
g9688.t1	238	PF00155	Aminotransferase class I and II	131	237	7.8e-13	IPR004839	Aminotransferase, class I/classII	GO:0009058|GO:0030170
g17734.t1	481	PF14291	Domain of unknown function (DUF4371)	292	479	2e-26	IPR025398	Domain of unknown function DUF4371
g20247.t1	200	PF10545	Alcohol dehydrogenase transcription factor Myb/SANT-like	59	104	3.6e-09	IPR006578	MADF domain
g19997.t1	396	PF10394	Histone acetyl transferase HAT1 N-terminus	5	164	1.2e-40	IPR019467	Histone acetyl transferase HAT1 N-terminal	GO:0006325
g25611.t1	703	PF00493	MCM2/3/5 family	242	602	3.8e-103	IPR001208	MCM domain	GO:0003677|GO:0005524|GO:0006260
g25611.t1	703	PF17207	MCM OB domain	94	208	7.8e-20	IPR033762	MCM OB domain
g19315.t1	445	PF02469	Fasciclin domain	38	159	1.9e-16	IPR000782	FAS1 domain
g19315.t1	445	PF02469	Fasciclin domain	176	296	1.7e-17	IPR000782	FAS1 domain
g19315.t1	445	PF02469	Fasciclin domain	339	438	1.1e-16	IPR000782	FAS1 domain
g20899.t1	220	PF05826	Phospholipase A2	161	206	3.1e-11	IPR016090	Phospholipase A2 domain	GO:0004623|GO:0006644|GO:0050482
g9352.t1	419	PF13532	2OG-Fe(II) oxygenase superfamily	121	265	8e-19	IPR027450	Alpha-ketoglutarate-dependent dioxygenase AlkB-like
g9352.t1	419	PF05207	CSL zinc finger	357	411	1.1e-09	IPR007872	Zinc finger, DPH-type
g9352.t1	419	PF00226	DnaJ domain	279	340	1.9e-14	IPR001623	DnaJ domain
g21312.t1	707	PF01757	Acyltransferase family	321	678	5e-12	IPR002656	Acyltransferase 3	GO:0016747
g2961.t1	287	PF01267	F-actin capping protein alpha subunit	18	284	6.1e-96	IPR002189	F-actin-capping protein subunit alpha	GO:0008290|GO:0051016
g23392.t1	1672	PF00008	EGF-like domain	432	464	4.1e-05	IPR000742	EGF-like domain	GO:0005515
g23392.t1	1672	PF00008	EGF-like domain	767	799	2.7e-06	IPR000742	EGF-like domain	GO:0005515
g23392.t1	1672	PF00008	EGF-like domain	546	578	0.00011	IPR000742	EGF-like domain	GO:0005515
g23392.t1	1672	PF00008	EGF-like domain	664	693	2.7e-07	IPR000742	EGF-like domain	GO:0005515
g23392.t1	1672	PF01414	Delta serrate ligand	297	360	2.6e-23	IPR001774	Delta/Serrate/lag-2 (DSL) protein	GO:0007154|GO:0016020
g23392.t1	1672	PF07657	N terminus of Notch ligand	95	179	4.4e-15	IPR011651	Notch ligand, N-terminal domain	GO:0007219|GO:0007275|GO:0016021
g15644.t1	542	PF14291	Domain of unknown function (DUF4371)	103	348	4.9e-40	IPR025398	Domain of unknown function DUF4371
g2346.t2	971	PF05224	NDT80 / PhoG like DNA-binding family	406	555	1.5e-22	IPR024061	NDT80 DNA-binding domain	GO:0003677
g2346.t2	971	PF13884	Chaperone of endosialidase	603	663	5.2e-11	IPR030392	Intramolecular chaperone auto-processing domain
g2346.t2	971	PF13887	Myelin gene regulatory factor -C-terminal domain 1	683	717	2.3e-19	IPR026932	Myelin gene regulatory factor C-terminal domain 1
g24738.t1	450	PF05934	Mid-1-related chloride channel (MCLC)	65	340	1.9e-06	IPR009231	Chloride channel CLIC-like
g2653.t1	228	PF09807	Elongation complex protein 6	111	201	3.3e-08	IPR018627	Elongation complex protein 6	GO:0033588
g14203.t1	382	PF05699	hAT family C-terminal dimerisation region	220	305	2.3e-13	IPR008906	HAT, C-terminal dimerisation domain	GO:0046983
g12750.t1	267	PF00091	Tubulin/FtsZ family, GTPase domain	2	37	5.5e-07	IPR003008	Tubulin/FtsZ, GTPase domain	GO:0003924
g12750.t1	267	PF03953	Tubulin C-terminal domain	87	207	4.8e-41	IPR018316	Tubulin/FtsZ, 2-layer sandwich domain
g8821.t1	267	PF10075	CSN8/PSMD8/EIF3K family	105	243	2.6e-36	IPR033464	CSN8/PSMD8/EIF3K
g24330.t1	1317	PF00069	Protein kinase domain	30	296	1.7e-21	IPR000719	Protein kinase domain	GO:0004672|GO:0005524|GO:0006468
g24330.t1	1317	PF00400	WD domain, G-beta repeat	941	978	0.00013	IPR001680	WD40 repeat	GO:0005515
g2270.t1	182	PF05699	hAT family C-terminal dimerisation region	94	154	1.1e-06	IPR008906	HAT, C-terminal dimerisation domain	GO:0046983
g4583.t1	558	PF00069	Protein kinase domain	1	201	6.2e-59	IPR000719	Protein kinase domain	GO:0004672|GO:0005524|GO:0006468
g20253.t1	137	PF12762	ISXO2-like transposase domain	45	119	8.4e-12	IPR024445	ISXO2-like transposase domain
g20406.t1	209	PF01423	LSM domain	8	85	2.5e-21	IPR001163	LSM domain, eukaryotic/archaea-type
g3144.t1	328	PF05147	Lanthionine synthetase C-like protein	45	323	2.6e-47	IPR007822	Lanthionine synthetase C-like
g7151.t1	843	PF04097	Nup93/Nic96	221	819	3.6e-70	IPR007231	Nucleoporin interacting component Nup93/Nic96	GO:0005643|GO:0006810
g20701.t1	516	PF00168	C2 domain	263	362	3.7e-05	IPR000008	C2 domain	GO:0005515
g20701.t1	516	PF00168	C2 domain	391	481	0.08	IPR000008	C2 domain	GO:0005515
g16432.t1	126	PF10545	Alcohol dehydrogenase transcription factor Myb/SANT-like	11	98	8.5e-21	IPR006578	MADF domain
g16432.t1	126	PF10421	2'-5'-oligoadenylate synthetase 1, domain 2, C-terminus	13	49	0.00017	IPR018952	2'-5'-oligoadenylate synthetase 1, domain 2/C-terminal
g15230.t1	152	PF00078	Reverse transcriptase (RNA-dependent DNA polymerase)	62	151	1.5e-12	IPR000477	Reverse transcriptase domain
g8253.t1	483	PF01399	PCI domain	325	425	5.4e-13	IPR000717	Proteasome component (PCI) domain	GO:0005515
g8253.t1	483	PF10602	26S proteasome subunit RPN7	129	306	8.5e-47	IPR019585	26S proteasome regulatory subunit Rpn7/COP9 signalosome complex subunit 1
g10181.t1	765	PF00400	WD domain, G-beta repeat	396	421	0.012	IPR001680	WD40 repeat	GO:0005515
g10181.t1	765	PF00400	WD domain, G-beta repeat	712	745	0.19	IPR001680	WD40 repeat	GO:0005515
g10181.t1	765	PF00400	WD domain, G-beta repeat	198	220	0.01	IPR001680	WD40 repeat	GO:0005515
g7541.t2	1662	PF00385	Chromo (CHRromatin Organisation MOdifier) domain	306	356	1.4e-14	IPR023780	Chromo domain
g7541.t2	1662	PF00385	Chromo (CHRromatin Organisation MOdifier) domain	192	270	1.7e-08	IPR023780	Chromo domain
g7541.t2	1662	PF00176	SNF2 family N-terminal domain	412	677	1.2e-62	IPR000330	SNF2-related, N-terminal domain	GO:0005524
g7541.t2	1662	PF00271	Helicase conserved C-terminal domain	702	814	6.6e-20	IPR001650	Helicase, C-terminal
g7541.t2	1662	PF13907	Domain of unknown function (DUF4208)	1335	1422	1.6e-22	IPR025260	Domain of unknown function DUF4208
g21448.t1	546	PF14952	Putative treble-clef, zinc-finger, Zn-binding	13	40	2.5e-11	IPR029269	Putative treble-clef, zinc-finger domain
g813.t1	101	PF10545	Alcohol dehydrogenase transcription factor Myb/SANT-like	5	52	4.2e-09	IPR006578	MADF domain
g1951.t1	1252	PF04408	Helicase associated domain (HA2)	988	1076	4.8e-25	IPR007502	Helicase-associated domain	GO:0004386
g1951.t1	1252	PF00575	S1 RNA binding domain	293	367	1.4e-13	IPR003029	S1 domain	GO:0003676
g1951.t1	1252	PF00271	Helicase conserved C-terminal domain	796	926	2.1e-13	IPR001650	Helicase, C-terminal
g1951.t1	1252	PF07717	Oligonucleotide/oligosaccharide-binding (OB)-fold	1112	1210	1e-25	IPR011709	Domain of unknown function DUF1605
g1951.t1	1252	PF00270	DEAD/DEAH box helicase	603	752	6.6e-06	IPR011545	DEAD/DEAH box helicase domain	GO:0003676|GO:0005524
g19226.t1	522	PF05179	RNA pol II accessory factor, Cdc73 family, C-terminal	360	511	6.8e-51	IPR031336	Cell division control protein 73, C-terminal
g19226.t1	522	PF16050	Paf1 complex subunit CDC73 N-terminal	1	293	1.1e-128	IPR032041	Paf1 complex subunit Cdc73, N-terminal domain
g17105.t1	229	PF14291	Domain of unknown function (DUF4371)	156	228	9e-09	IPR025398	Domain of unknown function DUF4371
g6234.t1	157	PF07679	Immunoglobulin I-set domain	2	95	5.3e-11	IPR013098	Immunoglobulin I-set
g6234.t1	157	PF13927	Immunoglobulin domain	103	147	1.1e-08
g6803.t1	1380	PF00169	PH domain	909	998	1.4e-08	IPR001849	Pleckstrin homology domain
g6803.t1	1380	PF00595	PDZ domain (Also known as DHR or GLGF)	209	282	3.7e-06	IPR001478	PDZ domain	GO:0005515
g6803.t1	1380	PF10534	Connector enhancer of kinase suppressor of ras	82	165	2e-15	IPR017874	CRIC domain
g6803.t1	1380	PF00536	SAM domain (Sterile alpha motif)	8	71	1.2e-11	IPR001660	Sterile alpha motif domain	GO:0005515
g21208.t1	387	PF03223	V-ATPase subunit C	4	374	2e-176	IPR004907	ATPase, V1 complex, subunit C	GO:0015078|GO:0015991|GO:0033180
g9525.t1	501	PF14291	Domain of unknown function (DUF4371)	218	338	3.4e-11	IPR025398	Domain of unknown function DUF4371
g9525.t1	501	PF00653	Inhibitor of Apoptosis domain	35	94	4.9e-13	IPR001370	BIR repeat
g20343.t1	995	PF11838	ERAP1-like C-terminal domain	651	967	1.1e-79	IPR024571	ERAP1-like C-terminal domain
g20343.t1	995	PF01433	Peptidase family M1	109	502	8.5e-131	IPR014782	Peptidase M1, membrane alanine aminopeptidase, N-terminal	GO:0008237|GO:0008270
g13637.t1	214	PF10545	Alcohol dehydrogenase transcription factor Myb/SANT-like	2	45	4.6e-07	IPR006578	MADF domain
g13637.t1	214	PF02944	BESS motif	128	160	5e-07	IPR004210	BESS motif	GO:0003677
g2502.t1	191	PF13499	EF-hand domain pair	109	175	3.5e-13	IPR002048	EF-hand domain	GO:0005509
g25141.t1	338	PF08127	Peptidase family C1 propeptide	24	61	8.9e-14	IPR012599	Peptidase C1A, propeptide	GO:0004197|GO:0050790
g25141.t1	338	PF00112	Papain family cysteine protease	87	332	1.4e-53	IPR000668	Peptidase C1A, papain C-terminal	GO:0006508|GO:0008234
g2123.t1	899	PF00703	Glycosyl hydrolases family 2	276	331	0.00015	IPR006102	Glycoside hydrolase, family 2, immunoglobulin-like beta-sandwich	GO:0004553|GO:0005975
g2123.t1	899	PF02836	Glycosyl hydrolases family 2, TIM barrel domain	411	548	2.9e-05	IPR006103	Glycoside hydrolase family 2, catalytic domain	GO:0004553|GO:0005975
g2123.t1	899	PF02837	Glycosyl hydrolases family 2, sugar binding domain	84	150	6.9e-07	IPR006104	Glycosyl hydrolases family 2, sugar binding domain	GO:0004553|GO:0005975
g2249.t1	870	PF00169	PH domain	167	278	1.4e-12	IPR001849	Pleckstrin homology domain
g2249.t1	870	PF14429	C2 domain in Dock180 and Zizimin proteins	650	837	2.1e-44	IPR027007	DHR-1 domain
g2249.t1	870	PF11878	Domain of unknown function (DUF3398)	54	144	6.5e-23	IPR021816	Dedicator of cytokinesis C/D, N-terminal
g8903.t1	474	PF00856	SET domain	149	255	1e-06	IPR001214	SET domain	GO:0005515
g13509.t1	264	PF12259	Baculovirus F protein	15	213	5.8e-16	IPR022048	Envelope fusion protein-like
g8375.t1	903	PF13519	von Willebrand factor type A domain	4	133	8.2e-20	IPR002035	von Willebrand factor, type A
g8375.t1	903	PF15300	INTS6/SAGE1/DDX26B/CT45 C-terminus	828	890	4.2e-22	IPR029307	INTS6/SAGE1/DDX26B/CT45, C-terminal
g14564.t1	198	PF03184	DDE superfamily endonuclease	1	54	2.9e-06	IPR004875	DDE superfamily endonuclease domain	GO:0003676
g5258.t1	597	PF10545	Alcohol dehydrogenase transcription factor Myb/SANT-like	374	433	7.7e-09	IPR006578	MADF domain
g5258.t1	597	PF02944	BESS motif	535	569	1.3e-09	IPR004210	BESS motif	GO:0003677
g5258.t1	597	PF00319	SRF-type transcription factor (DNA-binding and dimerisation domain)	10	57	2.3e-23	IPR002100	Transcription factor, MADS-box	GO:0003677|GO:0046983
g1559.t1	690	PF04065	Not1 N-terminal domain, CCR4-Not complex component	4	228	2.6e-89	IPR007207	CCR4-Not complex component, Not N-terminal domain	GO:0005634|GO:0006355
g1559.t1	690	PF04153	NOT2 / NOT3 / NOT5 family	559	684	6.7e-41	IPR007282	NOT2/NOT3/NOT5	GO:0005634|GO:0006355
g6498.t1	150	PF01592	NifU-like N terminal domain	22	146	1.9e-57	IPR002871	NIF system FeS cluster assembly, NifU, N-terminal	GO:0005506|GO:0016226|GO:0051536
g15166.t1	114	PF10545	Alcohol dehydrogenase transcription factor Myb/SANT-like	13	55	6.1e-08	IPR006578	MADF domain
g19322.t1	2018	PF12796	Ankyrin repeats (3 copies)	1654	1720	3.1e-10	IPR020683	Ankyrin repeat-containing domain
g19322.t1	2018	PF13606	Ankyrin repeat	1725	1752	0.0034	IPR002110	Ankyrin repeat	GO:0005515
g22627.t1	1166	PF13637	Ankyrin repeats (many copies)	682	734	5.5e-11
g22627.t1	1166	PF13637	Ankyrin repeats (many copies)	596	632	4.2e-05
g22627.t1	1166	PF00644	Poly(ADP-ribose) polymerase catalytic domain	967	1155	1.3e-24	IPR012317	Poly(ADP-ribose) polymerase, catalytic domain	GO:0003950
g22627.t1	1166	PF07647	SAM domain (Sterile alpha motif)	875	934	2.8e-12	IPR001660	Sterile alpha motif domain	GO:0005515
g22627.t1	1166	PF12796	Ankyrin repeats (3 copies)	497	591	1.3e-13	IPR020683	Ankyrin repeat-containing domain
g22627.t1	1166	PF12796	Ankyrin repeats (3 copies)	347	432	8.1e-09	IPR020683	Ankyrin repeat-containing domain
g22627.t1	1166	PF12796	Ankyrin repeats (3 copies)	26	119	1.4e-14	IPR020683	Ankyrin repeat-containing domain
g22627.t1	1166	PF12796	Ankyrin repeats (3 copies)	195	276	1e-11	IPR020683	Ankyrin repeat-containing domain
g22627.t1	1166	PF13857	Ankyrin repeats (many copies)	740	787	1.2e-08
g22627.t1	1166	PF13606	Ankyrin repeat	122	149	6.6e-05	IPR002110	Ankyrin repeat	GO:0005515
g22627.t1	1166	PF00023	Ankyrin repeat	280	310	9.3e-05	IPR002110	Ankyrin repeat	GO:0005515
g25004.t2	759	PF13639	Ring finger domain	689	731	1.5e-15	IPR001841	Zinc finger, RING-type	GO:0005515|GO:0008270
g19589.t1	340	PF16064	Domain of unknown function (DUF4806)	225	304	2.1e-11	IPR032071	Domain of unknown function DUF4806
g10431.t1	241	PF08395	7tm Chemosensory receptor	2	220	7.7e-17	IPR013604	7TM chemoreceptor	GO:0016021|GO:0050909
g20842.t1	1262	PF00690	Cation transporter/ATPase, N-terminus	238	284	0.00014	IPR004014	Cation-transporting P-type ATPase, N-terminal
g20842.t1	1262	PF12409	P5-type ATPase cation transporter	77	215	3.1e-17	IPR006544	P-type ATPase, subfamily V	GO:0006812|GO:0016021|GO:0016887
g20842.t1	1262	PF00122	E1-E2 ATPase	314	493	1e-29	IPR008250	P-type ATPase, A domain	GO:0000166|GO:0046872
g20842.t1	1262	PF00702	haloacid dehalogenase-like hydrolase	865	907	1.4e-06
g20842.t1	1262	PF00702	haloacid dehalogenase-like hydrolase	499	758	7.1e-10
g13875.t1	396	PF14291	Domain of unknown function (DUF4371)	3	131	2.9e-24	IPR025398	Domain of unknown function DUF4371
g13875.t1	396	PF05699	hAT family C-terminal dimerisation region	319	382	1e-06	IPR008906	HAT, C-terminal dimerisation domain	GO:0046983
g25051.t1	91	PF10961	Selenoprotein SelK_SelG	2	82	4.3e-18	IPR024491	Selenoprotein SelK/SelG
g183.t1	83	PF00379	Insect cuticle protein	5	44	3e-11	IPR000618	Insect cuticle protein	GO:0042302
g22673.t1	191	PF01428	AN1-like Zinc finger	10	44	7.2e-10	IPR000058	Zinc finger, AN1-type	GO:0008270
g18301.t1	121	PF00271	Helicase conserved C-terminal domain	8	83	5.1e-26	IPR001650	Helicase, C-terminal
g13911.t1	121	PF00271	Helicase conserved C-terminal domain	8	83	5.1e-26	IPR001650	Helicase, C-terminal
g8515.t1	580	PF08572	pre-mRNA processing factor 3 (PRP3)	216	428	4.7e-74	IPR013881	Pre-mRNA-splicing factor 3
g8515.t1	580	PF06544	Protein of unknown function (DUF1115)	452	573	1e-44	IPR010541	Domain of unknown function DUF1115
g917.t1	525	PF00232	Glycosyl hydrolase family 1	14	54	8.4e-12	IPR001360	Glycoside hydrolase family 1	GO:0004553|GO:0005975
g917.t1	525	PF00232	Glycosyl hydrolase family 1	107	518	6.1e-91	IPR001360	Glycoside hydrolase family 1	GO:0004553|GO:0005975
g12669.t1	217	PF02944	BESS motif	148	181	1.9e-05	IPR004210	BESS motif	GO:0003677
g24239.t1	1321	PF16489	GPCR-Autoproteolysis INducing (GAIN) domain	459	662	2.9e-40	IPR032471	GAIN domain, N-terminal
g24239.t1	1321	PF00002	7 transmembrane receptor (Secretin family)	745	975	2.1e-24	IPR000832	GPCR, family 2, secretin-like	GO:0004930|GO:0007186|GO:0016021
g24239.t1	1321	PF01825	GPCR proteolysis site, GPS, motif	688	728	6.5e-16	IPR000203	GPS motif	GO:0016020
g24239.t1	1321	PF02140	Galactose binding lectin domain	171	251	4.1e-19	IPR000922	D-galactoside/L-rhamnose binding SUEL lectin domain	GO:0030246
g920.t1	1124	PF09416	RNA helicase (UPF2 interacting domain)	103	253	8.2e-73	IPR018999	RNA helicase UPF1, UPF2-interacting domain	GO:0000184|GO:0003677|GO:0004386|GO:0005524|GO:0005737|GO:0008270
g920.t1	1124	PF13086	AAA domain	551	650	1.5e-24
g920.t1	1124	PF13087	AAA domain	659	855	4.4e-59
g154.t1	416	PF01545	Cation efflux family	24	218	8.6e-22	IPR002524	Cation efflux protein	GO:0006812|GO:0008324|GO:0016021|GO:0055085
g1064.t1	274	PF00106	short chain dehydrogenase	14	197	3.3e-37	IPR002347	Short-chain dehydrogenase/reductase SDR
g19105.t1	334	PF14291	Domain of unknown function (DUF4371)	38	278	1.9e-31	IPR025398	Domain of unknown function DUF4371
g12439.t1	411	PF02949	7tm Odorant receptor	51	398	3.7e-23	IPR004117	Olfactory receptor, insect	GO:0004984|GO:0005549|GO:0007608|GO:0016020
g15868.t1	463	PF00431	CUB domain	361	442	4.1e-08	IPR000859	CUB domain
g15868.t1	463	PF00431	CUB domain	92	185	9.1e-11	IPR000859	CUB domain
g15868.t1	463	PF00431	CUB domain	232	340	5e-09	IPR000859	CUB domain
g15868.t1	463	PF00431	CUB domain	2	85	5.1e-18	IPR000859	CUB domain
g2412.t1	712	PF13927	Immunoglobulin domain	281	369	4.9e-11
g2412.t1	712	PF13927	Immunoglobulin domain	401	509	3.3e-07
g2412.t1	712	PF00047	Immunoglobulin domain	161	245	9e-09	IPR013151	Immunoglobulin
g2375.t1	470	PF00067	Cytochrome P450	14	466	3.2e-78	IPR001128	Cytochrome P450	GO:0005506|GO:0016705|GO:0020037|GO:0055114
g24380.t1	819	PF09088	MIF4G like	352	476	3.7e-32	IPR015172	MIF4G-like, type 1	GO:0016070
g24380.t1	819	PF02854	MIF4G domain	49	245	7e-25	IPR003890	MIF4G-like, type 3	GO:0003723|GO:0005515
g24380.t1	819	PF09090	MIF4G like	491	789	5.6e-83	IPR015174	MIF4G-like, type 2	GO:0016070
g26747.t1	3799	PF00520	Ion transport protein	3409	3633	1.9e-17	IPR005821	Ion transport domain	GO:0005216|GO:0006811|GO:0016020|GO:0055085
g26747.t1	3799	PF08454	RyR and IP3R Homology associated	2807	2913	8.4e-32	IPR013662	RyR/IP3R Homology associated domain
g26747.t1	3799	PF02815	MIR domain	371	501	1.4e-43	IPR016093	MIR motif	GO:0016020
g26747.t1	3799	PF02815	MIR domain	556	609	3.6e-14	IPR016093	MIR motif	GO:0016020
g26747.t1	3799	PF08709	Inositol 1,4,5-trisphosphate/ryanodine receptor	36	246	1.5e-68	IPR014821	Inositol 1,4,5-trisphosphate/ryanodine receptor
g26747.t1	3799	PF01365	RIH domain	653	881	9.9e-59	IPR000699	RIH (RyR and IP3R Homology) domain	GO:0005262|GO:0016020|GO:0070588
g24434.t1	320	PF00248	Aldo/keto reductase family	19	295	5.3e-54	IPR023210	NADP-dependent oxidoreductase domain
g8007.t1	415	PF14291	Domain of unknown function (DUF4371)	92	329	8.9e-21	IPR025398	Domain of unknown function DUF4371
g16090.t1	176	PF09738	LRRFIP family	1	116	1.1e-25	IPR019139	Leucine-rich repeat flightless-interacting protein 1/2	GO:0006355
g24822.t2	842	PF07714	Protein tyrosine kinase	545	807	6.4e-93	IPR001245	Serine-threonine/tyrosine-protein kinase catalytic domain	GO:0004672|GO:0006468
g24822.t2	842	PF00051	Kringle domain	375	451	8.9e-11	IPR000001	Kringle
g24822.t2	842	PF01392	Fz domain	239	357	8.7e-09	IPR020067	Frizzled domain	GO:0005515
g24822.t2	842	PF07679	Immunoglobulin I-set domain	66	178	8.4e-13	IPR013098	Immunoglobulin I-set
g24768.t1	202	PF14529	Endonuclease-reverse transcriptase	105	195	1.6e-10	IPR005135	Endonuclease/exonuclease/phosphatase
g586.t1	562	PF07700	Haem-NO-binding	2	166	2e-54	IPR011644	Heme-NO binding	GO:0020037
g586.t1	562	PF00211	Adenylate and Guanylate cyclase catalytic domain	405	561	7.8e-52	IPR001054	Adenylyl cyclase class-3/4/guanylyl cyclase	GO:0009190|GO:0016849|GO:0035556
g586.t1	562	PF07701	Heme NO binding associated	205	398	1.5e-51	IPR011645	Haem NO binding associated	GO:0004383|GO:0006182
g15943.t1	163	PF05485	THAP domain	5	83	7.2e-18	IPR006612	Zinc finger, C2CH-type	GO:0003676
g21006.t1	1073	PF16880	N-terminal EH-domain containing protein	676	707	5.5e-07	IPR031692	EH domain-containing protein, N-terminal
g91.t1	1306	PF00664	ABC transporter transmembrane region	320	590	2.9e-42	IPR011527	ABC transporter type 1, transmembrane domain	GO:0005524|GO:0006810|GO:0016021|GO:0042626|GO:0055085
g91.t1	1306	PF00664	ABC transporter transmembrane region	867	1137	2.2e-36	IPR011527	ABC transporter type 1, transmembrane domain	GO:0005524|GO:0006810|GO:0016021|GO:0042626|GO:0055085
g91.t1	1306	PF00005	ABC transporter	1199	1270	6.8e-08	IPR003439	ABC transporter-like	GO:0005524|GO:0016887
g19627.t1	164	PF08163	NUC194 domain	11	137	2.8e-43	IPR012582	NUC194	GO:0003677|GO:0004677|GO:0005524|GO:0005634|GO:0006303
g22523.t2	1404	PF00498	FHA domain	112	167	1.1e-05	IPR000253	Forkhead-associated (FHA) domain	GO:0005515
g22523.t2	1404	PF00595	PDZ domain (Also known as DHR or GLGF)	679	759	3e-16	IPR001478	PDZ domain	GO:0005515
g22523.t2	1404	PF01843	DIL domain	455	557	4.2e-28	IPR002710	Dilute domain
g1741.t1	119	PF13656	RNA polymerase Rpb3/Rpb11 dimerisation domain	31	104	9.4e-28	IPR009025	DNA-directed RNA polymerase, RBP11-like dimerisation domain	GO:0006351|GO:0046983
g22034.t1	1221	PF12422	Condensin II non structural maintenance of chromosomes subunit	214	360	9e-37	IPR024741	Condensin-2 complex subunit G2	GO:0005634
g2388.t1	528	PF13660	Domain of unknown function (DUF4147)	50	292	3.9e-66	IPR025286	MOFRL-associated domain
g2388.t1	528	PF05161	MOFRL family	404	519	3.6e-32	IPR007835	MOFRL domain
g25228.t1	345	PF08613	Cyclin	93	172	5.2e-06	IPR013922	Cyclin PHO80-like	GO:0000079|GO:0019901
g19500.t1	975	PF03764	Elongation factor G, domain IV	710	826	1.6e-25	IPR005517	Translation elongation factor EFG/EF2, domain IV	GO:0005525
g19500.t1	975	PF03144	Elongation factor Tu domain 2	495	569	1.5e-12	IPR004161	Translation elongation factor EFTu-like, domain 2	GO:0005525
g19500.t1	975	PF16004	116 kDa U5 small nuclear ribonucleoprotein component N-terminus	4	107	2.3e-33	IPR031950	116 kDa U5 small nuclear ribonucleoprotein component, N-terminal
g19500.t1	975	PF00679	Elongation factor G C-terminus	829	917	2.8e-22	IPR000640	Translation elongation factor EFG, V domain
g19500.t1	975	PF00009	Elongation factor Tu GTP binding domain	126	377	2.3e-45
g19500.t1	975	PF14492	Elongation Factor G, domain II	588	651	8e-07	IPR009022	Elongation factor G, III-V domain
g24604.t1	314	PF08755	Hemimethylated DNA-binding protein YccV like	35	150	1.9e-11	IPR011722	Hemimethylated DNA-binding domain	GO:0003677
g24604.t1	314	PF04379	ApaG domain	204	287	3.5e-29	IPR007474	ApaG domain
g5654.t1	470	PF03221	Tc5 transposase DNA-binding domain	84	142	3.3e-09	IPR006600	HTH CenpB-type DNA-binding domain
g11270.t1	485	PF00566	Rab-GTPase-TBC domain	219	429	2e-46	IPR000195	Rab-GTPase-TBC domain
g20528.t1	293	PF00076	RNA recognition motif. (a.k.a. RRM, RBD, or RNP domain)	52	110	4.5e-15	IPR000504	RNA recognition motif domain	GO:0003676
g24539.t1	526	PF07571	TAF6 C-terminal HEAT repeat domain	294	382	1e-27	IPR011442	TAF6, C-terminal HEAT repeat domain	GO:0005634|GO:0051090
g24539.t1	526	PF02969	TATA box binding protein associated factor (TAF)	10	74	9.4e-22	IPR004823	TATA box binding protein associated factor (TAF)	GO:0006352
g19821.t2	759	PF00515	Tetratricopeptide repeat	534	565	8.4e-08	IPR001440	Tetratricopeptide repeat 1	GO:0005515
g19821.t2	759	PF00515	Tetratricopeptide repeat	601	632	1.2e-08	IPR001440	Tetratricopeptide repeat 1	GO:0005515
g19821.t2	759	PF00515	Tetratricopeptide repeat	567	599	1.9e-07	IPR001440	Tetratricopeptide repeat 1	GO:0005515
g19821.t2	759	PF12895	Anaphase-promoting complex, cyclosome, subunit 3	16	91	4e-23
g19821.t2	759	PF13432	Tetratricopeptide repeat	648	699	0.00023
g19821.t2	759	PF13181	Tetratricopeptide repeat	704	734	0.084	IPR019734	Tetratricopeptide repeat	GO:0005515
g303.t1	124	PF14291	Domain of unknown function (DUF4371)	1	83	2.5e-14	IPR025398	Domain of unknown function DUF4371
g4870.t1	1037	PF01590	GAF domain	532	676	1.4e-14	IPR003018	GAF domain	GO:0005515
g4870.t1	1037	PF01590	GAF domain	259	493	2.7e-16	IPR003018	GAF domain	GO:0005515
g4870.t1	1037	PF00233	3'5'-cyclic nucleotide phosphodiesterase	782	1016	9.4e-78	IPR002073	3'5'-cyclic nucleotide phosphodiesterase, catalytic domain	GO:0004114|GO:0007165
g5865.t1	131	PF10190	Putative transmembrane protein 170	27	131	1.3e-43	IPR019334	Transmembrane protein 170
g13205.t1	371	PF14291	Domain of unknown function (DUF4371)	125	335	6.8e-20	IPR025398	Domain of unknown function DUF4371
g15607.t1	426	PF00098	Zinc knuckle	375	391	0.00084	IPR001878	Zinc finger, CCHC-type	GO:0003676|GO:0008270
g7073.t1	1363	PF00092	von Willebrand factor type A domain	1173	1352	3.1e-05	IPR002035	von Willebrand factor, type A
g7073.t1	1363	PF07728	AAA domain (dynein-related subfamily)	728	874	3.7e-26	IPR011704	ATPase, dynein-related, AAA domain	GO:0005524|GO:0016887
g7073.t1	1363	PF07728	AAA domain (dynein-related subfamily)	70	226	3.5e-35	IPR011704	ATPase, dynein-related, AAA domain	GO:0005524|GO:0016887
g7073.t1	1363	PF07728	AAA domain (dynein-related subfamily)	402	557	6.4e-29	IPR011704	ATPase, dynein-related, AAA domain	GO:0005524|GO:0016887
g3553.t2	183	PF13912	C2H2-type zinc finger	72	96	2.3e-05	IPR007087	Zinc finger, C2H2	GO:0046872
g3553.t2	183	PF00096	Zinc finger, C2H2 type	100	122	2e-05	IPR007087	Zinc finger, C2H2	GO:0046872
g3553.t2	183	PF00096	Zinc finger, C2H2 type	131	153	4.8e-06	IPR007087	Zinc finger, C2H2	GO:0046872
g2135.t1	367	PF03643	Vacuolar protein sorting-associated protein 26	7	278	3.3e-124	IPR028934	Vacuolar protein sorting protein 26 related
g24767.t1	337	PF00069	Protein kinase domain	50	308	1.1e-51	IPR000719	Protein kinase domain	GO:0004672|GO:0005524|GO:0006468
g20064.t1	724	PF00493	MCM2/3/5 family	327	645	2.9e-130	IPR001208	MCM domain	GO:0003677|GO:0005524|GO:0006260
g20064.t1	724	PF17207	MCM OB domain	154	283	6.8e-32	IPR033762	MCM OB domain
g20064.t1	724	PF14551	MCM N-terminal domain	14	144	4.9e-17	IPR027925	MCM N-terminal domain
g25527.t1	593	PF01433	Peptidase family M1	17	386	1.1e-76	IPR014782	Peptidase M1, membrane alanine aminopeptidase, N-terminal	GO:0008237|GO:0008270
g25527.t1	593	PF09127	Leukotriene A4 hydrolase, C-terminal	464	593	1.4e-32	IPR015211	Peptidase M1, leukotriene A4 hydrolase/aminopeptidase C-terminal	GO:0008237|GO:0008270
g14925.t1	234	PF01204	Trehalase	5	230	1.2e-65	IPR001661	Glycoside hydrolase, family 37	GO:0004555|GO:0005991
g26117.t1	834	PF00514	Armadillo/beta-catenin-like repeat	620	659	9e-06	IPR000225	Armadillo	GO:0005515
g26117.t1	834	PF00514	Armadillo/beta-catenin-like repeat	258	290	3.4e-06	IPR000225	Armadillo	GO:0005515
g26117.t1	834	PF00514	Armadillo/beta-catenin-like repeat	379	417	2.6e-09	IPR000225	Armadillo	GO:0005515
g26117.t1	834	PF00514	Armadillo/beta-catenin-like repeat	459	501	1.3e-06	IPR000225	Armadillo	GO:0005515
g24068.t3	756	PF01562	Reprolysin family propeptide	38	158	4.6e-11	IPR002870	Peptidase M12B, propeptide
g24068.t3	756	PF00200	Disintegrin	499	575	4.6e-12	IPR001762	Disintegrin domain
g24068.t3	756	PF16698	Membrane-proximal domain, switch, for ADAM17	599	655	2.4e-19	IPR032029	ADAM17, membrane-proximal domain
g24068.t3	756	PF13688	Metallo-peptidase family M12	218	466	6.9e-33
g26418.t1	2033	PF00089	Trypsin	1789	2027	3e-64	IPR001254	Serine proteases, trypsin domain	GO:0004252|GO:0006508
g26418.t1	2033	PF00057	Low-density lipoprotein receptor domain class A	1593	1630	9.8e-11	IPR002172	Low-density lipoprotein (LDL) receptor class A repeat	GO:0005515
g26418.t1	2033	PF00057	Low-density lipoprotein receptor domain class A	1324	1359	6.8e-09	IPR002172	Low-density lipoprotein (LDL) receptor class A repeat	GO:0005515
g26418.t1	2033	PF00057	Low-density lipoprotein receptor domain class A	1446	1477	4e-07	IPR002172	Low-density lipoprotein (LDL) receptor class A repeat	GO:0005515
g26418.t1	2033	PF00059	Lectin C-type domain	1084	1216	8.5e-05	IPR001304	C-type lectin-like
g26418.t1	2033	PF00051	Kringle domain	1223	1306	2.3e-17	IPR000001	Kringle
g26418.t1	2033	PF00024	PAN domain	1365	1439	2.1e-12	IPR003609	PAN/Apple domain
g26418.t1	2033	PF01607	Chitin binding Peritrophin-A domain	96	147	4.9e-12	IPR002557	Chitin binding domain	GO:0005576|GO:0006030|GO:0008061
g26418.t1	2033	PF01607	Chitin binding Peritrophin-A domain	767	818	3e-13	IPR002557	Chitin binding domain	GO:0005576|GO:0006030|GO:0008061
g26418.t1	2033	PF00530	Scavenger receptor cysteine-rich domain	1648	1738	3.7e-27	IPR001190	SRCR domain	GO:0005044|GO:0016020
g26418.t1	2033	PF00530	Scavenger receptor cysteine-rich domain	940	1043	1e-14	IPR001190	SRCR domain	GO:0005044|GO:0016020
g26418.t1	2033	PF00530	Scavenger receptor cysteine-rich domain	1490	1586	1.8e-26	IPR001190	SRCR domain	GO:0005044|GO:0016020
g25542.t1	407	PF08395	7tm Chemosensory receptor	94	396	5.1e-25	IPR013604	7TM chemoreceptor	GO:0016021|GO:0050909
g17095.t1	258	PF03221	Tc5 transposase DNA-binding domain	220	255	9.2e-06	IPR006600	HTH CenpB-type DNA-binding domain
g17095.t1	258	PF04218	CENP-B N-terminal DNA-binding domain	152	202	4.9e-07	IPR007889	DNA binding HTH domain, Psq-type	GO:0003677
g10604.t1	588	PF00652	Ricin-type beta-trefoil lectin domain	463	577	1.1e-21	IPR000772	Ricin B, lectin domain
g10604.t1	588	PF00535	Glycosyl transferase family 2	140	324	2.8e-32	IPR001173	Glycosyltransferase 2-like
g13806.t1	182	PF10545	Alcohol dehydrogenase transcription factor Myb/SANT-like	7	50	1.1e-07	IPR006578	MADF domain
g12180.t1	365	PF07690	Major Facilitator Superfamily	10	286	9.2e-22	IPR011701	Major facilitator superfamily	GO:0016021|GO:0055085
g15890.t1	545	PF12259	Baculovirus F protein	23	537	4.4e-40	IPR022048	Envelope fusion protein-like
g19168.t1	194	PF01084	Ribosomal protein S18	128	176	3.2e-12	IPR001648	Ribosomal protein S18	GO:0003735|GO:0005622|GO:0005840|GO:0006412
g15845.t1	204	PF02944	BESS motif	104	138	1.2e-08	IPR004210	BESS motif	GO:0003677
g23679.t1	1728	PF00249	Myb-like DNA-binding domain	834	875	2.1e-10	IPR001005	SANT/Myb domain
g19373.t1	166	PF00642	Zinc finger C-x8-C-x5-C-x3-H type (and similar)	55	76	2.7e-07	IPR000571	Zinc finger, CCCH-type	GO:0046872
g19373.t1	166	PF06220	U1 zinc finger	3	38	1.2e-06	IPR013085	Zinc finger, U1-C type	GO:0008270
g24124.t1	623	PF03368	Dicer dimerisation domain	289	353	7.8e-05	IPR005034	Dicer dimerisation domain	GO:0016891
g24124.t1	623	PF00498	FHA domain	110	182	4.7e-16	IPR000253	Forkhead-associated (FHA) domain	GO:0005515
g8801.t1	705	PF01777	Ribosomal L27e protein family	622	705	4e-30	IPR001141	Ribosomal protein L27e	GO:0003735|GO:0005622|GO:0005840|GO:0006412
g9250.t1	839	PF00850	Histone deacetylase domain	75	371	5.6e-81	IPR023801	Histone deacetylase domain
g9250.t1	839	PF00850	Histone deacetylase domain	489	786	4.3e-85	IPR023801	Histone deacetylase domain
g23624.t1	349	PF01151	GNS1/SUR4 family	26	262	3.8e-65	IPR002076	ELO family	GO:0016021
g19969.t1	1159	PF00878	Cation-independent mannose-6-phosphate receptor repeat	433	572	2.2e-24	IPR000479	Cation-independent mannose-6-phosphate receptor	GO:0005215|GO:0005737|GO:0006810|GO:0016021
g19969.t1	1159	PF00878	Cation-independent mannose-6-phosphate receptor repeat	5	98	4.7e-06	IPR000479	Cation-independent mannose-6-phosphate receptor	GO:0005215|GO:0005737|GO:0006810|GO:0016021
g19969.t1	1159	PF00878	Cation-independent mannose-6-phosphate receptor repeat	297	420	2e-05	IPR000479	Cation-independent mannose-6-phosphate receptor	GO:0005215|GO:0005737|GO:0006810|GO:0016021
g19969.t1	1159	PF00878	Cation-independent mannose-6-phosphate receptor repeat	138	287	2.7e-17	IPR000479	Cation-independent mannose-6-phosphate receptor	GO:0005215|GO:0005737|GO:0006810|GO:0016021
g15899.t1	238	PF01204	Trehalase	2	222	1.1e-66	IPR001661	Glycoside hydrolase, family 37	GO:0004555|GO:0005991
g24286.t1	221	PF05071	NADH ubiquinone oxidoreductase subunit NDUFA12	35	131	7.9e-29	IPR007763	NADH dehydrogenase [ubiquinone] 1 alpha subcomplex subunit 12	GO:0008137|GO:0009055|GO:0016020
g24286.t1	221	PF05699	hAT family C-terminal dimerisation region	156	203	7.5e-05	IPR008906	HAT, C-terminal dimerisation domain	GO:0046983
g27694.t1	1248	PF13855	Leucine rich repeat	79	139	1e-10	IPR001611	Leucine-rich repeat	GO:0005515
g27694.t1	1248	PF13855	Leucine rich repeat	923	979	1.2e-10	IPR001611	Leucine-rich repeat	GO:0005515
g27694.t1	1248	PF13855	Leucine rich repeat	297	352	1.1e-10	IPR001611	Leucine-rich repeat	GO:0005515
g27694.t1	1248	PF13855	Leucine rich repeat	540	598	2.3e-10	IPR001611	Leucine-rich repeat	GO:0005515
g27694.t1	1248	PF13855	Leucine rich repeat	807	866	1.2e-13	IPR001611	Leucine-rich repeat	GO:0005515
g27694.t1	1248	PF13855	Leucine rich repeat	365	409	4.6e-07	IPR001611	Leucine-rich repeat	GO:0005515
g27694.t1	1248	PF13855	Leucine rich repeat	490	535	6.1e-07	IPR001611	Leucine-rich repeat	GO:0005515
g27694.t1	1248	PF13855	Leucine rich repeat	687	746	5.3e-14	IPR001611	Leucine-rich repeat	GO:0005515
g27694.t1	1248	PF13855	Leucine rich repeat	415	471	1.9e-06	IPR001611	Leucine-rich repeat	GO:0005515
g21432.t1	137	PF05699	hAT family C-terminal dimerisation region	58	113	2.5e-08	IPR008906	HAT, C-terminal dimerisation domain	GO:0046983
g8684.t1	318	PF00076	RNA recognition motif. (a.k.a. RRM, RBD, or RNP domain)	132	200	9.6e-14	IPR000504	RNA recognition motif domain	GO:0003676
g8684.t1	318	PF00076	RNA recognition motif. (a.k.a. RRM, RBD, or RNP domain)	52	120	1.2e-17	IPR000504	RNA recognition motif domain	GO:0003676
g15637.t1	121	PF13202	EF hand	94	107	0.0027	IPR002048	EF-hand domain	GO:0005509
g15637.t1	121	PF13499	EF-hand domain pair	26	83	2.9e-09	IPR002048	EF-hand domain	GO:0005509
g957.t1	408	PF01715	IPP transferase	15	98	4.2e-26	IPR018022	tRNA dimethylallyltransferase	GO:0008033
g25979.t1	2214	PF00271	Helicase conserved C-terminal domain	1663	1786	1.8e-16	IPR001650	Helicase, C-terminal
g25979.t1	2214	PF00176	SNF2 family N-terminal domain	410	718	1.5e-47	IPR000330	SNF2-related, N-terminal domain	GO:0005524
g22996.t2	2449	PF15613	Williams-Beuren syndrome DDT (WSD), D-TOX E motif	407	469	2.2e-06	IPR028941	WHIM2 domain
g22996.t2	2449	PF02791	DDT domain	209	265	2.3e-16	IPR018501	DDT domain
g22996.t2	2449	PF00628	PHD-finger	2275	2323	6.3e-07	IPR019787	Zinc finger, PHD-finger	GO:0005515
g22996.t2	2449	PF00628	PHD-finger	2220	2267	2.7e-10	IPR019787	Zinc finger, PHD-finger	GO:0005515
g22996.t2	2449	PF00439	Bromodomain	2344	2425	4.9e-24	IPR001487	Bromodomain	GO:0005515
g2930.t1	454	PF16123	Hydroxyacylglutathione hydrolase C-terminus	372	454	1.5e-23	IPR032282	Hydroxyacylglutathione hydrolase, C-terminal domain
g2930.t1	454	PF01981	Peptidyl-tRNA hydrolase PTH2	46	142	5.3e-30	IPR002833	Peptidyl-tRNA hydrolase, PTH2	GO:0004045
g2930.t1	454	PF00753	Metallo-beta-lactamase superfamily	215	267	1.2e-07	IPR001279	Metallo-beta-lactamase
g2930.t1	454	PF00753	Metallo-beta-lactamase superfamily	308	371	0.00012	IPR001279	Metallo-beta-lactamase
g12587.t1	269	PF17039	Fucosyltransferase, N-terminal	10	49	4.4e-09	IPR031481	Fucosyltransferase, N-terminal
g12587.t1	269	PF00852	Glycosyltransferase family 10 (fucosyltransferase) C-term	70	261	9.8e-62	IPR001503	Glycosyl transferase family 10	GO:0006486|GO:0008417|GO:0016020
g19204.t1	243	PF03227	Gamma interferon inducible lysosomal thiol reductase (GILT)	65	169	6.1e-30	IPR004911	Gamma interferon inducible lysosomal thiol reductase GILT
g10089.t1	1926	PF00058	Low-density lipoprotein receptor repeat class B	390	429	1.1e-06	IPR000033	LDLR class B repeat
g10089.t1	1926	PF00058	Low-density lipoprotein receptor repeat class B	432	471	4.9e-09	IPR000033	LDLR class B repeat
g10089.t1	1926	PF00058	Low-density lipoprotein receptor repeat class B	478	521	0.00013	IPR000033	LDLR class B repeat
g10089.t1	1926	PF14670	Coagulation Factor Xa inhibitory site	575	611	2.2e-09
g10089.t1	1926	PF00008	EGF-like domain	1753	1785	0.00016	IPR000742	EGF-like domain	GO:0005515
g10089.t1	1926	PF00057	Low-density lipoprotein receptor domain class A	743	781	7.5e-07	IPR002172	Low-density lipoprotein (LDL) receptor class A repeat	GO:0005515
g10089.t1	1926	PF00057	Low-density lipoprotein receptor domain class A	656	690	1.2e-08	IPR002172	Low-density lipoprotein (LDL) receptor class A repeat	GO:0005515
g10089.t1	1926	PF00057	Low-density lipoprotein receptor domain class A	129	162	2.3e-07	IPR002172	Low-density lipoprotein (LDL) receptor class A repeat	GO:0005515
g10089.t1	1926	PF00057	Low-density lipoprotein receptor domain class A	991	1026	1.5e-06	IPR002172	Low-density lipoprotein (LDL) receptor class A repeat	GO:0005515
g10089.t1	1926	PF00057	Low-density lipoprotein receptor domain class A	46	84	1.7e-09	IPR002172	Low-density lipoprotein (LDL) receptor class A repeat	GO:0005515
g10089.t1	1926	PF00057	Low-density lipoprotein receptor domain class A	904	940	7.9e-11	IPR002172	Low-density lipoprotein (LDL) receptor class A repeat	GO:0005515
g10089.t1	1926	PF00057	Low-density lipoprotein receptor domain class A	614	651	1.6e-07	IPR002172	Low-density lipoprotein (LDL) receptor class A repeat	GO:0005515
g10089.t1	1926	PF00057	Low-density lipoprotein receptor domain class A	175	211	1.7e-07	IPR002172	Low-density lipoprotein (LDL) receptor class A repeat	GO:0005515
g10089.t1	1926	PF00057	Low-density lipoprotein receptor domain class A	694	738	1.8e-07	IPR002172	Low-density lipoprotein (LDL) receptor class A repeat	GO:0005515
g10089.t1	1926	PF00057	Low-density lipoprotein receptor domain class A	785	821	4.8e-10	IPR002172	Low-density lipoprotein (LDL) receptor class A repeat	GO:0005515
g10089.t1	1926	PF00057	Low-density lipoprotein receptor domain class A	954	983	1.8e-07	IPR002172	Low-density lipoprotein (LDL) receptor class A repeat	GO:0005515
g10089.t1	1926	PF00057	Low-density lipoprotein receptor domain class A	89	126	6.9e-09	IPR002172	Low-density lipoprotein (LDL) receptor class A repeat	GO:0005515
g10089.t1	1926	PF00057	Low-density lipoprotein receptor domain class A	864	899	1.6e-08	IPR002172	Low-density lipoprotein (LDL) receptor class A repeat	GO:0005515
g10089.t1	1926	PF00057	Low-density lipoprotein receptor domain class A	1035	1069	4.5e-09	IPR002172	Low-density lipoprotein (LDL) receptor class A repeat	GO:0005515
g10089.t1	1926	PF00057	Low-density lipoprotein receptor domain class A	2	42	6.4e-10	IPR002172	Low-density lipoprotein (LDL) receptor class A repeat	GO:0005515
g10089.t1	1926	PF00057	Low-density lipoprotein receptor domain class A	825	860	8.7e-12	IPR002172	Low-density lipoprotein (LDL) receptor class A repeat	GO:0005515
g8403.t1	136	PF00410	Ribosomal protein S8	4	136	6.4e-42	IPR000630	Ribosomal protein S8	GO:0003735|GO:0005840|GO:0006412
g1826.t1	312	PF17121	Zinc finger, C3HC4 type (RING finger)	6	48	6.7e-07	IPR001841	Zinc finger, RING-type	GO:0005515|GO:0008270
g1826.t1	312	PF06391	CDK-activating kinase assembly factor MAT1	53	250	1.6e-58	IPR015877	Cdk-activating kinase assembly factor MAT1, centre	GO:0005634|GO:0007049
g3330.t2	510	PF07992	Pyridine nucleotide-disulphide oxidoreductase	44	371	2e-65	IPR023753	FAD/NAD(P)-binding domain	GO:0016491|GO:0055114
g3330.t2	510	PF02852	Pyridine nucleotide-disulphide oxidoreductase, dimerisation domain	390	498	3e-39	IPR004099	Pyridine nucleotide-disulphide oxidoreductase, dimerisation domain	GO:0045454|GO:0055114
g27350.t1	843	PF04679	ATP dependent DNA ligase C terminal region	697	808	5.8e-24	IPR012309	DNA ligase, ATP-dependent, C-terminal	GO:0003910|GO:0006281|GO:0006310
g27350.t1	843	PF04675	DNA ligase N terminus	239	414	1.7e-40	IPR012308	DNA ligase, ATP-dependent, N-terminal	GO:0003677|GO:0003910|GO:0006281|GO:0006310
g27350.t1	843	PF01068	ATP dependent DNA ligase domain	493	547	3.2e-14	IPR012310	DNA ligase, ATP-dependent, central	GO:0003910|GO:0005524|GO:0006281|GO:0006310
g27350.t1	843	PF01068	ATP dependent DNA ligase domain	548	672	2.1e-34	IPR012310	DNA ligase, ATP-dependent, central	GO:0003910|GO:0005524|GO:0006281|GO:0006310
g11719.t1	1075	PF04565	RNA polymerase Rpb2, domain 3	380	448	2.2e-22	IPR007645	RNA polymerase Rpb2, domain 3	GO:0003677|GO:0003899|GO:0006351
g11719.t1	1075	PF04560	RNA polymerase Rpb2, domain 7	986	1061	1.5e-19	IPR007641	RNA polymerase Rpb2, domain 7	GO:0003677|GO:0003899|GO:0006351
g11719.t1	1075	PF00562	RNA polymerase Rpb2, domain 6	588	984	1.2e-128	IPR007120	DNA-directed RNA polymerase, subunit 2, domain 6	GO:0003677|GO:0003899|GO:0006351
g11719.t1	1075	PF04563	RNA polymerase beta subunit	17	356	4.9e-08	IPR007644	RNA polymerase, beta subunit, protrusion	GO:0003677|GO:0003899|GO:0006351
g11719.t1	1075	PF04561	RNA polymerase Rpb2, domain 2	127	315	7.7e-48	IPR007642	RNA polymerase Rpb2, domain 2	GO:0003677|GO:0003899|GO:0006351
g4357.t1	3224	PF12780	P-loop containing dynein motor region D4	1461	1669	5.3e-43	IPR024317	Dynein heavy chain, P-loop containing D4 domain
g4357.t1	3224	PF12781	ATP-binding dynein motor region D5	2117	2336	3.2e-71
g4357.t1	3224	PF12777	Microtubule-binding stalk of dynein motor	1756	2088	9.2e-42	IPR024743	Dynein heavy chain, coiled coil stalk
g4357.t1	3224	PF07728	AAA domain (dynein-related subfamily)	769	900	4.4e-12	IPR011704	ATPase, dynein-related, AAA domain	GO:0005524|GO:0016887
g4357.t1	3224	PF12774	Hydrolytic ATP binding site of dynein motor region D1	410	643	1.4e-80
g4357.t1	3224	PF12775	P-loop containing dynein motor region D3	1120	1382	5.4e-18
g4357.t1	3224	PF08393	Dynein heavy chain, N-terminal region 2	1	254	5.5e-82	IPR013602	Dynein heavy chain, domain-2
g4357.t1	3224	PF03028	Dynein heavy chain and region D6 of dynein motor	2485	3218	1.4e-161	IPR004273	Dynein heavy chain domain	GO:0003777|GO:0007018|GO:0030286
g5192.t1	730	PF01344	Kelch motif	419	461	2.5e-08	IPR006652	Kelch repeat type 1	GO:0005515
g5192.t1	730	PF01344	Kelch motif	652	695	7.8e-11	IPR006652	Kelch repeat type 1	GO:0005515
g5192.t1	730	PF01344	Kelch motif	559	600	2.3e-16	IPR006652	Kelch repeat type 1	GO:0005515
g5192.t1	730	PF01344	Kelch motif	464	509	2e-14	IPR006652	Kelch repeat type 1	GO:0005515
g5192.t1	730	PF01344	Kelch motif	605	649	3.9e-12	IPR006652	Kelch repeat type 1	GO:0005515
g5192.t1	730	PF01344	Kelch motif	511	555	2.5e-11	IPR006652	Kelch repeat type 1	GO:0005515
g5192.t1	730	PF00651	BTB/POZ domain	58	172	5.3e-17	IPR000210	BTB/POZ domain	GO:0005515
g1179.t1	284	PF16835	Pre-mRNA-splicing factor SF3a complex subunit 2 (Prp11)	112	206	4.7e-39	IPR031781	SF3A2 domain
g1179.t1	284	PF12874	Zinc-finger of C2H2 type	54	78	2.9e-06
g5815.t1	454	PF15982	N-terminal cysteine-rich region of Transmembrane protein 135	14	146	5.9e-32	IPR031926	Transmembrane protein 135, N-terminal domain
g1158.t1	492	PF00067	Cytochrome P450	26	469	7.2e-81	IPR001128	Cytochrome P450	GO:0005506|GO:0016705|GO:0020037|GO:0055114
g15765.t1	260	PF02902	Ulp1 protease family, C-terminal catalytic domain	66	142	4.7e-12	IPR003653	Ulp1 protease family, C-terminal catalytic domain	GO:0006508|GO:0008234
g23281.t1	1817	PF02889	Sec63 Brl domain	1475	1812	1.4e-59	IPR004179	Sec63 domain
g23281.t1	1817	PF02889	Sec63 Brl domain	658	963	6.1e-74	IPR004179	Sec63 domain
g23281.t1	1817	PF00270	DEAD/DEAH box helicase	159	335	2.6e-27	IPR011545	DEAD/DEAH box helicase domain	GO:0003676|GO:0005524
g23281.t1	1817	PF00270	DEAD/DEAH box helicase	1010	1174	8.5e-23	IPR011545	DEAD/DEAH box helicase domain	GO:0003676|GO:0005524
g23281.t1	1817	PF00271	Helicase conserved C-terminal domain	444	535	9.6e-06	IPR001650	Helicase, C-terminal
g23281.t1	1817	PF00271	Helicase conserved C-terminal domain	1288	1355	0.00011	IPR001650	Helicase, C-terminal
g19888.t1	1218	PF00566	Rab-GTPase-TBC domain	706	918	1.5e-48	IPR000195	Rab-GTPase-TBC domain
g19888.t1	1218	PF08416	Phosphotyrosine-binding domain	274	355	0.00019	IPR013625	Tensin/EPS8 phosphotyrosine-binding domain	GO:0005515
g19888.t1	1218	PF11830	Domain of unknown function (DUF3350)	602	648	4.7e-15	IPR021785	Domain of unknown function DUF3350
g26213.t1	156	PF14931	Intraflagellar transport complex B, subunit 20	35	152	5.8e-35	IPR028172	Intraflagellar transport protein 20
g20906.t1	341	PF02319	E2F/DP family winged-helix DNA-binding domain	53	117	2.1e-21	IPR003316	E2F/DP family, winged-helix DNA-binding domain	GO:0003700|GO:0005667|GO:0006355
g20906.t1	341	PF16421	E2F transcription factor CC-MB domain	133	239	4.8e-11	IPR032198	E2F transcription factor, CC-MB domain	GO:0046983
g16116.t1	227	PF02944	BESS motif	133	167	5.6e-12	IPR004210	BESS motif	GO:0003677
g16116.t1	227	PF10545	Alcohol dehydrogenase transcription factor Myb/SANT-like	2	46	3.1e-05	IPR006578	MADF domain
g1513.t1	517	PF00067	Cytochrome P450	52	514	4.7e-85	IPR001128	Cytochrome P450	GO:0005506|GO:0016705|GO:0020037|GO:0055114
g19850.t1	2117	PF05041	Pecanex protein (C-terminus)	1613	1839	1.3e-111	IPR007735	Pecanex	GO:0016021
g20396.t1	291	PF04502	Family of unknown function (DUF572)	33	101	2.8e-41	IPR007590	CWC16 protein
g20396.t1	291	PF04502	Family of unknown function (DUF572)	102	268	9.9e-27	IPR007590	CWC16 protein
g27219.t1	555	PF02782	FGGY family of carbohydrate kinases, C-terminal domain	280	489	1e-45	IPR018485	Carbohydrate kinase, FGGY, C-terminal	GO:0005975|GO:0016773
g27219.t1	555	PF00370	FGGY family of carbohydrate kinases, N-terminal domain	2	263	3.4e-21	IPR018484	Carbohydrate kinase, FGGY, N-terminal	GO:0005975|GO:0016773
g26830.t2	141	PF00379	Insect cuticle protein	79	134	2.3e-10	IPR000618	Insect cuticle protein	GO:0042302
g24339.t1	517	PF13516	Leucine Rich repeat	378	396	0.096	IPR001611	Leucine-rich repeat	GO:0005515
g24339.t1	517	PF13516	Leucine Rich repeat	401	423	0.13	IPR001611	Leucine-rich repeat	GO:0005515
g24339.t1	517	PF13516	Leucine Rich repeat	240	262	0.018	IPR001611	Leucine-rich repeat	GO:0005515
g24339.t1	517	PF13516	Leucine Rich repeat	349	368	0.76	IPR001611	Leucine-rich repeat	GO:0005515
g24339.t1	517	PF13516	Leucine Rich repeat	272	292	0.16	IPR001611	Leucine-rich repeat	GO:0005515
g24339.t1	517	PF13516	Leucine Rich repeat	186	210	0.014	IPR001611	Leucine-rich repeat	GO:0005515
g24339.t1	517	PF13516	Leucine Rich repeat	299	317	0.029	IPR001611	Leucine-rich repeat	GO:0005515
g24339.t1	517	PF12937	F-box-like	79	115	1.9e-07	IPR001810	F-box domain	GO:0005515
g6101.t1	339	PF12874	Zinc-finger of C2H2 type	197	219	0.00099
g6101.t1	339	PF12874	Zinc-finger of C2H2 type	283	305	0.062
g6101.t1	339	PF12874	Zinc-finger of C2H2 type	256	275	0.012
g6101.t1	339	PF00096	Zinc finger, C2H2 type	137	159	8.6e-06	IPR007087	Zinc finger, C2H2	GO:0046872
g24458.t1	140	PF06003	Survival motor neuron protein (SMN)	86	139	1.6e-13	IPR010304	Survival motor neuron	GO:0003723|GO:0005634|GO:0005737|GO:0006397
g18113.t1	209	PF12259	Baculovirus F protein	9	208	8.4e-13	IPR022048	Envelope fusion protein-like
g21309.t1	593	PF13193	AMP-binding enzyme C-terminal domain	499	575	3.5e-12	IPR025110	AMP-binding enzyme C-terminal domain
g21309.t1	593	PF00501	AMP-binding enzyme	55	490	5.2e-90	IPR000873	AMP-dependent synthetase/ligase	GO:0003824|GO:0008152
g1050.t1	392	PF00151	Lipase	106	385	3.3e-54	IPR013818	Lipase/vitellogenin
g22791.t1	427	PF07527	Hairy Orange	170	204	2.7e-12	IPR003650	Orange domain	GO:0003677|GO:0006355
g22791.t1	427	PF00010	Helix-loop-helix DNA-binding domain	98	147	6.3e-15	IPR011598	Myc-type, basic helix-loop-helix (bHLH) domain	GO:0046983
g10336.t1	477	PF05699	hAT family C-terminal dimerisation region	408	476	8.5e-09	IPR008906	HAT, C-terminal dimerisation domain	GO:0046983
g508.t1	592	PF03221	Tc5 transposase DNA-binding domain	1	58	4.5e-17	IPR006600	HTH CenpB-type DNA-binding domain
g508.t1	592	PF07714	Protein tyrosine kinase	277	581	4.7e-90	IPR001245	Serine-threonine/tyrosine-protein kinase catalytic domain	GO:0004672|GO:0006468
g22912.t1	781	PF00013	KH domain	415	479	2.3e-16	IPR004088	K Homology domain, type 1	GO:0003723
g22912.t1	781	PF00013	KH domain	112	174	2.7e-16	IPR004088	K Homology domain, type 1	GO:0003723
g22912.t1	781	PF00013	KH domain	209	272	5.7e-16	IPR004088	K Homology domain, type 1	GO:0003723
g22912.t1	781	PF00013	KH domain	311	374	5.5e-18	IPR004088	K Homology domain, type 1	GO:0003723
g22912.t1	781	PF09005	Domain of unknown function (DUF1897)	633	667	5.2e-19	IPR015096	Domain of unknown function DUF1897
g22912.t1	781	PF09005	Domain of unknown function (DUF1897)	548	582	2.1e-18	IPR015096	Domain of unknown function DUF1897
g7213.t1	224	PF00574	Clp protease	42	220	4.5e-78	IPR023562	Clp protease proteolytic subunit /Translocation-enhancing protein TepA
g8407.t1	174	PF00032	Cytochrome b(C-terminal)/b6/petD	79	167	5.3e-19	IPR005798	Cytochrome b/b6, C-terminal	GO:0009055|GO:0016020|GO:0016491
g27576.t1	137	PF00164	Ribosomal protein S12/S23	37	126	7.8e-27	IPR006032	Ribosomal protein S12/S23	GO:0003735|GO:0005622|GO:0005840|GO:0006412
g14668.t1	229	PF14529	Endonuclease-reverse transcriptase	2	108	5.9e-12	IPR005135	Endonuclease/exonuclease/phosphatase
g1346.t1	85	PF05680	ATP synthase E chain	7	75	8.1e-21	IPR008386	ATP synthase, F0 complex, subunit E, mitochondrial	GO:0000276|GO:0015078|GO:0015986
g23838.t1	700	PF01740	STAS domain	565	688	1.5e-13	IPR002645	STAS domain
g23838.t1	700	PF00916	Sulfate permease family	107	514	5.2e-103	IPR011547	SLC26A/SulP transporter domain	GO:0008272|GO:0015116|GO:0016021
g9794.t1	384	PF03221	Tc5 transposase DNA-binding domain	1	58	7.7e-17	IPR006600	HTH CenpB-type DNA-binding domain
g22110.t1	117	PF02902	Ulp1 protease family, C-terminal catalytic domain	30	104	0.0002	IPR003653	Ulp1 protease family, C-terminal catalytic domain	GO:0006508|GO:0008234
g15758.t1	507	PF00067	Cytochrome P450	42	479	4.9e-74	IPR001128	Cytochrome P450	GO:0005506|GO:0016705|GO:0020037|GO:0055114
g23728.t1	465	PF00096	Zinc finger, C2H2 type	316	338	2.7e-05	IPR007087	Zinc finger, C2H2	GO:0046872
g23728.t1	465	PF12874	Zinc-finger of C2H2 type	373	391	0.057
g1964.t1	183	PF05699	hAT family C-terminal dimerisation region	146	181	9.6e-05	IPR008906	HAT, C-terminal dimerisation domain	GO:0046983
g7078.t1	277	PF10277	Frag1/DRAM/Sfk1 family	40	262	2.6e-31	IPR019402	Frag1/DRAM/Sfk1
g8285.t1	96	PF04218	CENP-B N-terminal DNA-binding domain	4	52	1.7e-12	IPR007889	DNA binding HTH domain, Psq-type	GO:0003677
g23828.t1	1039	PF10377	Autophagy-related protein 11	913	1014	4.2e-09	IPR019460	Autophagy-related protein 11
g4622.t1	198	PF14529	Endonuclease-reverse transcriptase	4	57	1.6e-06	IPR005135	Endonuclease/exonuclease/phosphatase
g11515.t1	396	PF13418	Galactose oxidase, central domain	73	112	7.4e-08
g11515.t1	396	PF13964	Kelch motif	233	276	3.2e-12
g11515.t1	396	PF13415	Galactose oxidase, central domain	133	183	1.5e-06
g25832.t1	586	PF00028	Cadherin domain	121	218	5.8e-15	IPR002126	Cadherin	GO:0005509|GO:0007156|GO:0016020
g25832.t1	586	PF00028	Cadherin domain	232	324	4.9e-24	IPR002126	Cadherin	GO:0005509|GO:0007156|GO:0016020
g25832.t1	586	PF00028	Cadherin domain	452	540	1.1e-18	IPR002126	Cadherin	GO:0005509|GO:0007156|GO:0016020
g25832.t1	586	PF00028	Cadherin domain	346	434	1.7e-13	IPR002126	Cadherin	GO:0005509|GO:0007156|GO:0016020
g8400.t1	224	PF00189	Ribosomal protein S3, C-terminal domain	137	219	1.6e-30
g21345.t1	416	PF03792	PBC domain	34	228	9.2e-95	IPR005542	PBX	GO:0003700|GO:0005634
g21345.t1	416	PF00046	Homeobox domain	230	289	3.1e-18	IPR001356	Homeobox domain	GO:0003677
g11975.t1	313	PF04937	Protein of unknown function (DUF 659)	60	185	1.7e-11	IPR007021	Domain of unknown function DUF659
g21514.t1	1051	PF02233	NAD(P) transhydrogenase beta subunit	588	1045	3.9e-180	IPR034300	NADP transhydrogenase beta-like domain
g21514.t1	1051	PF01262	Alanine dehydrogenase/PNT, C-terminal domain	180	404	1.3e-73	IPR007698	Alanine dehydrogenase/pyridine nucleotide transhydrogenase, NAD(H)-binding domain
g21514.t1	1051	PF12769	4TM region of pyridine nucleotide transhydrogenase, mitoch	469	553	1.3e-31	IPR024605	NAD(P) transhydrogenase, alpha subunit, C-terminal
g21514.t1	1051	PF05222	Alanine dehydrogenase/PNT, N-terminal domain	43	176	1.4e-41	IPR007886	Alanine dehydrogenase/pyridine nucleotide transhydrogenase, N-terminal
g788.t1	1014	PF00082	Subtilase family	176	432	8e-37	IPR000209	Peptidase S8/S53 domain	GO:0004252|GO:0006508
g855.t1	926	PF00443	Ubiquitin carboxyl-terminal hydrolase	545	906	6.4e-42	IPR001394	Peptidase C19, ubiquitin carboxyl-terminal hydrolase	GO:0016579|GO:0036459
g11253.t1	715	PF05699	hAT family C-terminal dimerisation region	622	688	1.1e-13	IPR008906	HAT, C-terminal dimerisation domain	GO:0046983
g11253.t1	715	PF13843	Transposase IS4	204	369	1.4e-32	IPR029526	PiggyBac transposable element-derived protein
g14687.t1	405	PF04003	Dip2/Utp12 Family	268	370	1e-14	IPR007148	Small-subunit processome, Utp12
g14687.t1	405	PF00400	WD domain, G-beta repeat	137	171	0.094	IPR001680	WD40 repeat	GO:0005515
g14687.t1	405	PF00400	WD domain, G-beta repeat	57	88	8.8e-05	IPR001680	WD40 repeat	GO:0005515
g6344.t1	441	PF00621	RhoGEF domain	62	231	8.7e-40	IPR000219	Dbl homology (DH) domain	GO:0005089|GO:0035023
g19137.t1	511	PF02931	Neurotransmitter-gated ion-channel ligand binding domain	48	254	6.7e-74	IPR006202	Neurotransmitter-gated ion-channel ligand-binding domain	GO:0005230|GO:0006810|GO:0016020
g19137.t1	511	PF02932	Neurotransmitter-gated ion-channel transmembrane region	261	500	1.1e-60	IPR006029	Neurotransmitter-gated ion-channel transmembrane domain	GO:0006811|GO:0016020
g26762.t1	422	PF08544	GHMP kinases C terminal	325	403	2.1e-15	IPR013750	GHMP kinase, C-terminal domain
g26762.t1	422	PF00288	GHMP kinases N terminal domain	154	221	7.9e-12	IPR006204	GHMP kinase N-terminal domain	GO:0005524
g26762.t1	422	PF10509	Galactokinase galactose-binding signature	56	91	1.2e-16	IPR019539	Galactokinase galactose-binding domain
g26755.t1	755	PF08397	IRSp53/MIM homology domain	17	236	1.6e-73	IPR013606	IMD/I-BAR domain	GO:0007009
g23016.t1	183	PF00307	Calponin homology (CH) domain	18	121	5.5e-20	IPR001715	Calponin homology domain	GO:0005515
g23016.t1	183	PF00402	Calponin family repeat	156	179	7.7e-09	IPR000557	Calponin repeat
g23774.t2	1558	PF00595	PDZ domain (Also known as DHR or GLGF)	48	115	2.5e-15	IPR001478	PDZ domain	GO:0005515
g23774.t2	1558	PF00621	RhoGEF domain	917	1099	1.5e-34	IPR000219	Dbl homology (DH) domain	GO:0005089|GO:0035023
g23774.t2	1558	PF00130	Phorbol esters/diacylglycerol binding domain (C1 domain)	650	700	1.5e-10	IPR002219	Protein kinase C-like, phorbol ester/diacylglycerol-binding domain	GO:0035556
g23774.t2	1558	PF09128	Regulator of G protein signalling-like domain	422	610	8.2e-52	IPR015212	Regulator of G protein signalling-like domain	GO:0005089|GO:0005737
g1738.t1	1090	PF02181	Formin Homology 2 Domain	614	979	4.1e-91	IPR015425	Formin, FH2 domain
g1738.t1	1090	PF06367	Diaphanous FH3 Domain	263	454	1.1e-55	IPR010472	Formin, FH3 domain	GO:0003779|GO:0016043
g1738.t1	1090	PF06371	Diaphanous GTPase-binding Domain	79	258	5.1e-42	IPR010473	Formin, GTPase-binding domain	GO:0003779|GO:0017048|GO:0030036
g1738.t1	1090	PF06345	DRF Autoregulatory Domain	1031	1045	1.7e-06	IPR010465	DRF autoregulatory
g4927.t1	341	PF00151	Lipase	49	331	3.7e-61	IPR013818	Lipase/vitellogenin
g15570.t1	228	PF14291	Domain of unknown function (DUF4371)	13	150	4.5e-17	IPR025398	Domain of unknown function DUF4371
g10269.t1	240	PF00155	Aminotransferase class I and II	128	234	2.2e-12	IPR004839	Aminotransferase, class I/classII	GO:0009058|GO:0030170
g19239.t1	202	PF04438	HIT zinc finger	161	189	6.9e-08	IPR007529	Zinc finger, HIT-type
g19239.t1	202	PF06331	Transcription factor TFIIH complex subunit Tfb5	1	43	3.8e-11	IPR009400	TFIIH subunit TTDA/Tfb5	GO:0000439|GO:0006289|GO:0006355
g9795.t1	89	PF04218	CENP-B N-terminal DNA-binding domain	4	53	8.6e-11	IPR007889	DNA binding HTH domain, Psq-type	GO:0003677
g20945.t1	760	PF08324	PUL domain	506	751	3.5e-49	IPR013535	PUL domain
g20945.t1	760	PF09070	PFU (PLAA family ubiquitin binding)	345	451	2.7e-37	IPR015155	PLAA family ubiquitin binding, PFU
g20945.t1	760	PF00400	WD domain, G-beta repeat	219	260	0.0063	IPR001680	WD40 repeat	GO:0005515
g20945.t1	760	PF00400	WD domain, G-beta repeat	181	215	0.2	IPR001680	WD40 repeat	GO:0005515
g11992.t1	84	PF11976	Ubiquitin-2 like Rad60 SUMO-like	8	75	7.5e-18	IPR022617	Rad60/SUMO-like domain
g5248.t1	626	PF01061	ABC-2 type transporter	355	564	1.3e-24	IPR013525	ABC-2 type transporter	GO:0016020
g5248.t1	626	PF00005	ABC transporter	27	173	4e-25	IPR003439	ABC transporter-like	GO:0005524|GO:0016887
g26697.t1	729	PF13855	Leucine rich repeat	90	150	7.8e-13	IPR001611	Leucine-rich repeat	GO:0005515
g26697.t1	729	PF13855	Leucine rich repeat	170	220	3.2e-07	IPR001611	Leucine-rich repeat	GO:0005515
g26697.t1	729	PF13927	Immunoglobulin domain	272	368	1.2e-11
g9478.t1	1426	PF00035	Double-stranded RNA binding motif	386	450	2.4e-10	IPR014720	Double-stranded RNA-binding domain
g9478.t1	1426	PF07744	SPOC domain	1260	1423	1.1e-32	IPR012921	Spen paralogue and orthologue SPOC, C-terminal
g9478.t1	1426	PF00076	RNA recognition motif. (a.k.a. RRM, RBD, or RNP domain)	985	1053	2.8e-12	IPR000504	RNA recognition motif domain	GO:0003676
g9478.t1	1426	PF00076	RNA recognition motif. (a.k.a. RRM, RBD, or RNP domain)	1066	1126	3.5e-08	IPR000504	RNA recognition motif domain	GO:0003676
g27573.t1	663	PF00089	Trypsin	392	639	6.8e-33	IPR001254	Serine proteases, trypsin domain	GO:0004252|GO:0006508
g27573.t1	663	PF00057	Low-density lipoprotein receptor domain class A	172	207	4.2e-09	IPR002172	Low-density lipoprotein (LDL) receptor class A repeat	GO:0005515
g27573.t1	663	PF00057	Low-density lipoprotein receptor domain class A	131	164	3.4e-09	IPR002172	Low-density lipoprotein (LDL) receptor class A repeat	GO:0005515
g27573.t1	663	PF00057	Low-density lipoprotein receptor domain class A	77	114	1.1e-08	IPR002172	Low-density lipoprotein (LDL) receptor class A repeat	GO:0005515
g27573.t1	663	PF00057	Low-density lipoprotein receptor domain class A	39	70	6.9e-09	IPR002172	Low-density lipoprotein (LDL) receptor class A repeat	GO:0005515
g10586.t1	361	PF00651	BTB/POZ domain	70	178	4.5e-25	IPR000210	BTB/POZ domain	GO:0005515
g10586.t1	361	PF07707	BTB And C-terminal Kelch	185	284	7.1e-20	IPR011705	BTB/Kelch-associated
g4164.t1	631	PF14529	Endonuclease-reverse transcriptase	310	427	5.9e-26	IPR005135	Endonuclease/exonuclease/phosphatase
g4775.t1	433	PF00917	MATH domain	119	211	6.1e-06	IPR002083	MATH/TRAF domain	GO:0005515
g4775.t1	433	PF00651	BTB/POZ domain	251	355	1.7e-32	IPR000210	BTB/POZ domain	GO:0005515
g3361.t1	865	PF07555	beta-N-acetylglucosaminidase	15	263	1.7e-66	IPR011496	Beta-N-acetylglucosaminidase
g18675.t1	339	PF14529	Endonuclease-reverse transcriptase	233	334	3.5e-12	IPR005135	Endonuclease/exonuclease/phosphatase
g2090.t1	771	PF04821	Timeless protein	73	305	2.8e-20	IPR006906	Timeless protein
g13726.t1	238	PF00855	PWWP domain	7	85	5.5e-11	IPR000313	PWWP domain
g24203.t1	154	PF00379	Insect cuticle protein	53	106	3.9e-12	IPR000618	Insect cuticle protein	GO:0042302
g19669.t1	2053	PF16197	Ketoacyl-synthetase C-terminal extension	378	487	7.1e-33	IPR032821	Ketoacyl-synthetase, C-terminal extension
g19669.t1	2053	PF08659	KR domain	1750	1929	2e-13	IPR013968	Polyketide synthase, ketoreductase domain
g19669.t1	2053	PF02801	Beta-ketoacyl synthase, C-terminal domain	259	375	3.8e-29	IPR014031	Beta-ketoacyl synthase, C-terminal
g19669.t1	2053	PF00109	Beta-ketoacyl synthase, N-terminal domain	18	250	7.1e-47	IPR014030	Beta-ketoacyl synthase, N-terminal
g19669.t1	2053	PF00698	Acyl transferase domain	507	820	2.2e-79	IPR014043	Acyl transferase
g18694.t1	174	PF13843	Transposase IS4	7	169	4e-26	IPR029526	PiggyBac transposable element-derived protein
g13262.t1	733	PF05699	hAT family C-terminal dimerisation region	636	708	1.1e-09	IPR008906	HAT, C-terminal dimerisation domain	GO:0046983
g13262.t1	733	PF14291	Domain of unknown function (DUF4371)	173	241	2.7e-09	IPR025398	Domain of unknown function DUF4371
g388.t1	328	PF00400	WD domain, G-beta repeat	223	264	0.017	IPR001680	WD40 repeat	GO:0005515
g388.t1	328	PF00400	WD domain, G-beta repeat	97	126	0.00014	IPR001680	WD40 repeat	GO:0005515
g388.t1	328	PF00400	WD domain, G-beta repeat	18	45	0.11	IPR001680	WD40 repeat	GO:0005515
g20329.t1	169	PF03098	Animal haem peroxidase	1	41	9.5e-08	IPR019791	Haem peroxidase, animal
g19469.t1	246	PF06585	Haemolymph juvenile hormone binding protein (JHBP)	13	243	1.6e-49	IPR010562	Haemolymph juvenile hormone binding
g23454.t1	517	PF01490	Transmembrane amino acid transporter protein	108	509	5.2e-61	IPR013057	Amino acid transporter, transmembrane domain
g27179.t1	511	PF00245	Alkaline phosphatase	79	501	4.5e-121	IPR001952	Alkaline phosphatase	GO:0008152|GO:0016791
g3080.t1	1430	PF00621	RhoGEF domain	1040	1227	2.2e-34	IPR000219	Dbl homology (DH) domain	GO:0005089|GO:0035023
g18331.t1	137	PF14529	Endonuclease-reverse transcriptase	3	64	1.4e-07	IPR005135	Endonuclease/exonuclease/phosphatase
g2320.t1	490	PF07716	Basic region leucine zipper	419	461	4.1e-05	IPR004827	Basic-leucine zipper domain	GO:0003700|GO:0006355|GO:0043565
g6292.t1	309	PF00515	Tetratricopeptide repeat	155	187	2.4e-10	IPR001440	Tetratricopeptide repeat 1	GO:0005515
g6292.t1	309	PF00515	Tetratricopeptide repeat	122	153	1.1e-08	IPR001440	Tetratricopeptide repeat 1	GO:0005515
g6292.t1	309	PF13181	Tetratricopeptide repeat	93	118	0.16	IPR019734	Tetratricopeptide repeat	GO:0005515
g6292.t1	309	PF16546	Homodimerisation domain of SGTA	3	56	3.6e-17	IPR032374	SGTA, homodimerisation domain
g13475.t1	173	PF05699	hAT family C-terminal dimerisation region	86	172	1.2e-11	IPR008906	HAT, C-terminal dimerisation domain	GO:0046983
g1159.t1	873	PF00096	Zinc finger, C2H2 type	380	402	1.4e-05	IPR007087	Zinc finger, C2H2	GO:0046872
g1159.t1	873	PF13912	C2H2-type zinc finger	408	431	0.037	IPR007087	Zinc finger, C2H2	GO:0046872
g1159.t1	873	PF13912	C2H2-type zinc finger	469	488	0.019	IPR007087	Zinc finger, C2H2	GO:0046872
g20493.t1	959	PF01266	FAD dependent oxidoreductase	105	463	1.1e-54	IPR006076	FAD dependent oxidoreductase	GO:0016491|GO:0055114
g20493.t1	959	PF08669	Glycine cleavage T-protein C-terminal barrel domain	820	925	1.1e-15	IPR013977	Glycine cleavage T-protein, C-terminal barrel domain
g20493.t1	959	PF16350	FAD dependent oxidoreductase central domain	467	522	1.3e-19	IPR032503	FAD dependent oxidoreductase, central domain
g20493.t1	959	PF01571	Aminomethyltransferase folate-binding domain	525	811	6.5e-66	IPR006222	Glycine cleavage T-protein-like, N-terminal
g6693.t1	539	PF00083	Sugar (and other) transporter	117	526	3.1e-21	IPR005828	Major facilitator, sugar transporter-like	GO:0016021|GO:0022857|GO:0055085
g8633.t1	367	PF01926	50S ribosome-binding GTPase	65	165	2.2e-19	IPR006073	GTP binding domain	GO:0005525
g8633.t1	367	PF02824	TGS domain	291	365	4.3e-24	IPR004095	TGS
g8633.t1	367	PF16897	C-terminal region of MMR_HSR1 domain	185	290	4.4e-42	IPR031662	GTP binding protein, second domain
g15787.t1	290	PF13843	Transposase IS4	140	287	3.3e-25	IPR029526	PiggyBac transposable element-derived protein
g92.t1	499	PF00415	Regulator of chromosome condensation (RCC1) repeat	309	357	1.3e-05	IPR000408	Regulator of chromosome condensation, RCC1
g92.t1	499	PF00415	Regulator of chromosome condensation (RCC1) repeat	107	155	9.1e-09	IPR000408	Regulator of chromosome condensation, RCC1
g92.t1	499	PF00415	Regulator of chromosome condensation (RCC1) repeat	52	100	1.8e-14	IPR000408	Regulator of chromosome condensation, RCC1
g92.t1	499	PF00415	Regulator of chromosome condensation (RCC1) repeat	259	306	1.8e-09	IPR000408	Regulator of chromosome condensation, RCC1
g92.t1	499	PF00415	Regulator of chromosome condensation (RCC1) repeat	213	255	7.7e-06	IPR000408	Regulator of chromosome condensation, RCC1
g92.t1	499	PF00415	Regulator of chromosome condensation (RCC1) repeat	158	209	2.9e-12	IPR000408	Regulator of chromosome condensation, RCC1
g19865.t1	547	PF00415	Regulator of chromosome condensation (RCC1) repeat	393	440	6.8e-09	IPR000408	Regulator of chromosome condensation, RCC1
g19865.t1	547	PF00415	Regulator of chromosome condensation (RCC1) repeat	332	384	2.7e-05	IPR000408	Regulator of chromosome condensation, RCC1
g19865.t1	547	PF00415	Regulator of chromosome condensation (RCC1) repeat	224	277	2e-09	IPR000408	Regulator of chromosome condensation, RCC1
g19865.t1	547	PF00415	Regulator of chromosome condensation (RCC1) repeat	280	328	8.2e-05	IPR000408	Regulator of chromosome condensation, RCC1
g19865.t1	547	PF00415	Regulator of chromosome condensation (RCC1) repeat	445	491	0.00021	IPR000408	Regulator of chromosome condensation, RCC1
g23484.t1	1093	PF00041	Fibronectin type III domain	987	1074	4.3e-08	IPR003961	Fibronectin type III	GO:0005515
g18812.t1	273	PF04984	Phage tail sheath protein	1	90	6.9e-12	IPR007067	Tail sheath protein
g18812.t1	273	PF04984	Phage tail sheath protein	100	270	1.4e-21	IPR007067	Tail sheath protein
g4138.t1	356	PF00046	Homeobox domain	255	311	1.5e-19	IPR001356	Homeobox domain	GO:0003677
g4138.t1	356	PF00412	LIM domain	85	141	8.5e-14	IPR001781	Zinc finger, LIM-type	GO:0008270
g4138.t1	356	PF00412	LIM domain	23	79	2.6e-14	IPR001781	Zinc finger, LIM-type	GO:0008270
g5132.t1	409	PF01167	Tub family	164	403	9.7e-85	IPR000007	Tubby, C-terminal
g13466.t1	999	PF05225	helix-turn-helix, Psq domain	264	300	2e-06	IPR007889	DNA binding HTH domain, Psq-type	GO:0003677
g13466.t1	999	PF03221	Tc5 transposase DNA-binding domain	325	391	0.00013	IPR006600	HTH CenpB-type DNA-binding domain
g13466.t1	999	PF03184	DDE superfamily endonuclease	507	630	2.9e-15	IPR004875	DDE superfamily endonuclease domain	GO:0003676
g10613.t1	114	PF10545	Alcohol dehydrogenase transcription factor Myb/SANT-like	11	98	2.9e-13	IPR006578	MADF domain
g722.t1	743	PF00307	Calponin homology (CH) domain	20	118	5.5e-14	IPR001715	Calponin homology domain	GO:0005515
g722.t1	743	PF00630	Filamin/ABP280 repeat	331	421	4e-12	IPR017868	Filamin/ABP280 repeat-like
g722.t1	743	PF00630	Filamin/ABP280 repeat	232	323	3.9e-17	IPR017868	Filamin/ABP280 repeat-like
g722.t1	743	PF00630	Filamin/ABP280 repeat	619	706	7.7e-13	IPR017868	Filamin/ABP280 repeat-like
g722.t1	743	PF00630	Filamin/ABP280 repeat	132	223	1.8e-14	IPR017868	Filamin/ABP280 repeat-like
g722.t1	743	PF00630	Filamin/ABP280 repeat	523	611	5.7e-17	IPR017868	Filamin/ABP280 repeat-like
g722.t1	743	PF00630	Filamin/ABP280 repeat	432	511	1e-15	IPR017868	Filamin/ABP280 repeat-like
g17592.t1	357	PF14291	Domain of unknown function (DUF4371)	102	350	1e-22	IPR025398	Domain of unknown function DUF4371
g18020.t1	359	PF13843	Transposase IS4	142	357	9.2e-38	IPR029526	PiggyBac transposable element-derived protein
g26308.t1	278	PF10584	Proteasome subunit A N-terminal signature	6	28	1.5e-13	IPR000426	Proteasome alpha-subunit, N-terminal domain	GO:0004175|GO:0006511|GO:0019773
g26308.t1	278	PF00227	Proteasome subunit	29	215	2.6e-52	IPR001353	Proteasome, subunit alpha/beta	GO:0004298|GO:0005839|GO:0051603
g10942.t1	135	PF05699	hAT family C-terminal dimerisation region	35	108	4e-09	IPR008906	HAT, C-terminal dimerisation domain	GO:0046983
g2437.t1	514	PF14291	Domain of unknown function (DUF4371)	153	349	1.9e-10	IPR025398	Domain of unknown function DUF4371
g2437.t1	514	PF05699	hAT family C-terminal dimerisation region	463	512	6.1e-06	IPR008906	HAT, C-terminal dimerisation domain	GO:0046983
g22818.t1	415	PF00153	Mitochondrial carrier protein	30	87	4e-06	IPR018108	Mitochondrial substrate/solute carrier
g22818.t1	415	PF00153	Mitochondrial carrier protein	191	295	2.3e-15	IPR018108	Mitochondrial substrate/solute carrier
g22818.t1	415	PF00153	Mitochondrial carrier protein	318	411	6.8e-21	IPR018108	Mitochondrial substrate/solute carrier
g13856.t1	180	PF13842	DDE_Tnp_1-like zinc-ribbon	138	170	2.1e-06	IPR032718	PiggyBac transposable element-derived protein 4, C-terminal zinc-ribbon
g9218.t1	229	PF10545	Alcohol dehydrogenase transcription factor Myb/SANT-like	98	145	4.2e-05	IPR006578	MADF domain
g2049.t1	345	PF13923	Zinc finger, C3HC4 type (RING finger)	46	86	4e-15
g2049.t1	345	PF16207	RAWUL domain RING finger- and WD40-associated ubiquitin-like	258	333	2.2e-23	IPR032443	RAWUL domain
g21665.t2	1259	PF00203	Ribosomal protein S19	77	161	5.1e-33	IPR002222	Ribosomal protein S19/S15	GO:0003735|GO:0005840|GO:0006412
g21665.t2	1259	PF07714	Protein tyrosine kinase	327	589	1.4e-83	IPR001245	Serine-threonine/tyrosine-protein kinase catalytic domain	GO:0004672|GO:0006468
g20001.t1	599	PF12140	SLED domain	349	457	2.1e-34	IPR021987	SLED domain
g20001.t1	599	PF00536	SAM domain (Sterile alpha motif)	531	595	1.9e-13	IPR001660	Sterile alpha motif domain	GO:0005515
g20001.t1	599	PF02820	mbt repeat	263	326	1.1e-25	IPR004092	Mbt repeat	GO:0005634|GO:0006355
g20001.t1	599	PF02820	mbt repeat	153	220	1.8e-20	IPR004092	Mbt repeat	GO:0005634|GO:0006355
g5162.t1	1340	PF00664	ABC transporter transmembrane region	99	366	5.7e-28	IPR011527	ABC transporter type 1, transmembrane domain	GO:0005524|GO:0006810|GO:0016021|GO:0042626|GO:0055085
g5162.t1	1340	PF00664	ABC transporter transmembrane region	749	1014	2.4e-26	IPR011527	ABC transporter type 1, transmembrane domain	GO:0005524|GO:0006810|GO:0016021|GO:0042626|GO:0055085
g5162.t1	1340	PF00005	ABC transporter	462	596	1.2e-21	IPR003439	ABC transporter-like	GO:0005524|GO:0016887
g5162.t1	1340	PF00005	ABC transporter	1103	1249	4.9e-28	IPR003439	ABC transporter-like	GO:0005524|GO:0016887
g23795.t1	304	PF00112	Papain family cysteine protease	55	300	1.3e-47	IPR000668	Peptidase C1A, papain C-terminal	GO:0006508|GO:0008234
g23167.t1	177	PF02892	BED zinc finger	6	47	1.7e-09	IPR003656	Zinc finger, BED-type	GO:0003677
g17616.t1	202	PF13843	Transposase IS4	133	197	1.2e-13	IPR029526	PiggyBac transposable element-derived protein
g22919.t1	506	PF00083	Sugar (and other) transporter	73	493	7.8e-52	IPR005828	Major facilitator, sugar transporter-like	GO:0016021|GO:0022857|GO:0055085
g17317.t1	198	PF05485	THAP domain	4	92	2.9e-16	IPR006612	Zinc finger, C2CH-type	GO:0003676
g17317.t1	198	PF05485	THAP domain	124	192	5e-11	IPR006612	Zinc finger, C2CH-type	GO:0003676
g14651.t1	347	PF03221	Tc5 transposase DNA-binding domain	48	86	1.8e-05	IPR006600	HTH CenpB-type DNA-binding domain
g14651.t1	347	PF03184	DDE superfamily endonuclease	105	237	6.8e-33	IPR004875	DDE superfamily endonuclease domain	GO:0003676
g13810.t1	234	PF02892	BED zinc finger	4	46	5.8e-10	IPR003656	Zinc finger, BED-type	GO:0003677
g5728.t2	1846	PF02210	Laminin G domain	1001	1129	5.7e-16	IPR001791	Laminin G domain
g5728.t2	1846	PF02210	Laminin G domain	395	521	7.6e-17	IPR001791	Laminin G domain
g5728.t2	1846	PF02210	Laminin G domain	580	704	5.8e-06	IPR001791	Laminin G domain
g5728.t2	1846	PF02210	Laminin G domain	1232	1381	3.3e-09	IPR001791	Laminin G domain
g5728.t2	1846	PF02210	Laminin G domain	157	292	1.1e-16	IPR001791	Laminin G domain
g5728.t2	1846	PF00008	EGF-like domain	1152	1183	5e-07	IPR000742	EGF-like domain	GO:0005515
g5728.t2	1846	PF00014	Kunitz/Bovine pancreatic trypsin inhibitor domain	27	76	2.3e-08	IPR002223	Pancreatic trypsin inhibitor Kunitz domain	GO:0004867
g421.t1	1442	PF00940	DNA-dependent RNA polymerase	1041	1442	4.7e-160	IPR002092	DNA-directed RNA polymerase, phage-type	GO:0003677|GO:0003899|GO:0006351
g421.t1	1442	PF01974	tRNA intron endonuclease, catalytic C-terminal domain	120	189	3.6e-15	IPR006677	tRNA intron endonuclease, catalytic domain-like	GO:0000213|GO:0006388
g421.t1	1442	PF14700	DNA-directed RNA polymerase N-terminal	627	914	6.4e-48	IPR029262	DNA-directed RNA polymerase, N-terminal
g11313.t1	577	PF05091	Eukaryotic translation initiation factor 3 subunit 7 (eIF-3)	29	551	2.4e-217	IPR007783	Eukaryotic translation initiation factor 3 subunit D	GO:0003743|GO:0005737|GO:0005852
g26552.t1	224	PF00010	Helix-loop-helix DNA-binding domain	119	170	2.9e-15	IPR011598	Myc-type, basic helix-loop-helix (bHLH) domain	GO:0046983
g24269.t1	188	PF00307	Calponin homology (CH) domain	26	132	1.2e-23	IPR001715	Calponin homology domain	GO:0005515
g24269.t1	188	PF00402	Calponin family repeat	165	187	2.1e-10	IPR000557	Calponin repeat
g27433.t2	3171	PF00053	Laminin EGF domain	894	933	7.6e-08	IPR002049	Laminin EGF domain
g27433.t2	3171	PF00053	Laminin EGF domain	1133	1175	3.2e-07	IPR002049	Laminin EGF domain
g27433.t2	3171	PF00053	Laminin EGF domain	1569	1621	0.00034	IPR002049	Laminin EGF domain
g27433.t2	3171	PF00053	Laminin EGF domain	791	846	0.00024	IPR002049	Laminin EGF domain
g27433.t2	3171	PF00053	Laminin EGF domain	741	788	2.1e-07	IPR002049	Laminin EGF domain
g27433.t2	3171	PF00053	Laminin EGF domain	1038	1080	3.6e-09	IPR002049	Laminin EGF domain
g27433.t2	3171	PF00053	Laminin EGF domain	396	442	1.2e-05	IPR002049	Laminin EGF domain
g27433.t2	3171	PF00053	Laminin EGF domain	849	886	0.00018	IPR002049	Laminin EGF domain
g27433.t2	3171	PF00053	Laminin EGF domain	1624	1666	1.5e-05	IPR002049	Laminin EGF domain
g27433.t2	3171	PF00053	Laminin EGF domain	990	1031	1e-10	IPR002049	Laminin EGF domain
g27433.t2	3171	PF00053	Laminin EGF domain	1522	1564	5.5e-07	IPR002049	Laminin EGF domain
g27433.t2	3171	PF00053	Laminin EGF domain	273	318	0.024	IPR002049	Laminin EGF domain
g27433.t2	3171	PF00053	Laminin EGF domain	326	381	0.012	IPR002049	Laminin EGF domain
g27433.t2	3171	PF00053	Laminin EGF domain	1086	1130	0.016	IPR002049	Laminin EGF domain
g27433.t2	3171	PF00053	Laminin EGF domain	446	493	5e-07	IPR002049	Laminin EGF domain
g27433.t2	3171	PF00053	Laminin EGF domain	942	987	1.3e-07	IPR002049	Laminin EGF domain
g27433.t2	3171	PF00053	Laminin EGF domain	1179	1233	1.3e-06	IPR002049	Laminin EGF domain
g27433.t2	3171	PF00055	Laminin N-terminal (Domain VI)	35	271	2.6e-56	IPR008211	Laminin, N-terminal
g27433.t2	3171	PF00052	Laminin B (Domain IV)	559	702	3.8e-24	IPR000034	Laminin IV
g27433.t2	3171	PF00052	Laminin B (Domain IV)	1339	1475	1.7e-26	IPR000034	Laminin IV
g27433.t2	3171	PF02210	Laminin G domain	2450	2583	1.9e-12	IPR001791	Laminin G domain
g27433.t2	3171	PF02210	Laminin G domain	2274	2390	1.8e-10	IPR001791	Laminin G domain
g27433.t2	3171	PF02210	Laminin G domain	2842	2966	4.7e-15	IPR001791	Laminin G domain
g27433.t2	3171	PF02210	Laminin G domain	3017	3148	4.9e-19	IPR001791	Laminin G domain
g7434.t1	259	PF03128	CXCXC repeat	227	237	0.022	IPR004153	CXCXC repeat
g7434.t1	259	PF00341	PDGF/VEGF domain	120	192	4.4e-13	IPR000072	PDGF/VEGF domain	GO:0008083|GO:0016020
g19730.t1	504	PF00050	Kazal-type serine protease inhibitor domain	451	492	6.5e-12	IPR002350	Kazal domain	GO:0005515
g19730.t1	504	PF07648	Kazal-type serine protease inhibitor domain	401	429	2.9e-06	IPR002350	Kazal domain	GO:0005515
g19730.t1	504	PF07648	Kazal-type serine protease inhibitor domain	35	69	2.1e-08	IPR002350	Kazal domain	GO:0005515
g19730.t1	504	PF07648	Kazal-type serine protease inhibitor domain	301	339	1.7e-07	IPR002350	Kazal domain	GO:0005515
g19730.t1	504	PF07648	Kazal-type serine protease inhibitor domain	352	383	8.6e-07	IPR002350	Kazal domain	GO:0005515
g19730.t1	504	PF07648	Kazal-type serine protease inhibitor domain	88	117	1.4e-06	IPR002350	Kazal domain	GO:0005515
g19730.t1	504	PF07648	Kazal-type serine protease inhibitor domain	246	289	7.4e-05	IPR002350	Kazal domain	GO:0005515
g19730.t1	504	PF07648	Kazal-type serine protease inhibitor domain	140	175	6.7e-05	IPR002350	Kazal domain	GO:0005515
g19730.t1	504	PF07648	Kazal-type serine protease inhibitor domain	190	218	9.3e-05	IPR002350	Kazal domain	GO:0005515
g1692.t1	428	PF03619	Organic solute transporter Ostalpha	128	386	2.2e-30	IPR005178	Organic solute transporter subunit alpha/Transmembrane protein 184
g24127.t1	593	PF00667	FAD binding domain	206	423	2.5e-33	IPR003097	FAD-binding, type 1	GO:0016491|GO:0055114
g24127.t1	593	PF00258	Flavodoxin	9	136	7.4e-26	IPR008254	Flavodoxin/nitric oxide synthase	GO:0010181
g24127.t1	593	PF00175	Oxidoreductase NAD-binding domain	454	562	8.8e-12	IPR001433	Oxidoreductase FAD/NAD(P)-binding	GO:0016491|GO:0055114
g5139.t1	971	PF03160	Calx-beta domain	459	548	1.4e-18	IPR003644	Na-Ca exchanger/integrin-beta4	GO:0007154|GO:0016021
g5139.t1	971	PF03160	Calx-beta domain	567	664	8e-21	IPR003644	Na-Ca exchanger/integrin-beta4	GO:0007154|GO:0016021
g5139.t1	971	PF01699	Sodium/calcium exchanger protein	762	922	7.2e-14	IPR004837	Sodium/calcium exchanger membrane region	GO:0016021|GO:0055085
g5139.t1	971	PF01699	Sodium/calcium exchanger protein	143	323	2.2e-24	IPR004837	Sodium/calcium exchanger membrane region	GO:0016021|GO:0055085
g9584.t1	298	PF02892	BED zinc finger	111	152	2.4e-08	IPR003656	Zinc finger, BED-type	GO:0003677
g5509.t1	210	PF00071	Ras family	6	190	1.5e-14	IPR001806	Small GTPase superfamily	GO:0005525|GO:0007264
g26756.t1	735	PF00069	Protein kinase domain	16	283	1e-45	IPR000719	Protein kinase domain	GO:0004672|GO:0005524|GO:0006468
g14644.t1	907	PF13589	Histidine kinase-, DNA gyrase B-, and HSP90-like ATPase	302	414	6.8e-11
g14644.t1	907	PF01381	Helix-turn-helix	8	55	3e-05	IPR001387	Cro/C1-type helix-turn-helix domain	GO:0043565
g14644.t1	907	PF01381	Helix-turn-helix	163	214	6.6e-11	IPR001387	Cro/C1-type helix-turn-helix domain	GO:0043565
g14644.t1	907	PF08676	MutL C terminal dimerisation domain	719	866	8.2e-41	IPR014790	MutL, C-terminal, dimerisation	GO:0005524|GO:0006298
g14644.t1	907	PF01119	DNA mismatch repair protein, C-terminal domain	490	602	4.8e-36	IPR013507	DNA mismatch repair protein, C-terminal	GO:0005524|GO:0006298|GO:0030983
g25753.t2	527	PF00307	Calponin homology (CH) domain	181	281	2e-11	IPR001715	Calponin homology domain	GO:0005515
g25753.t2	527	PF03271	EB1-like C-terminal motif	468	505	3.7e-17	IPR004953	EB1, C-terminal	GO:0008017
g4935.t1	981	PF02171	Piwi domain	649	949	2.2e-91	IPR003165	Piwi domain	GO:0003676
g4935.t1	981	PF16486	N-terminal domain of argonaute	175	301	1e-14	IPR032474	Protein argonaute, N-terminal
g4935.t1	981	PF02170	PAZ domain	378	497	2.9e-11	IPR003100	PAZ domain	GO:0005515
g4935.t1	981	PF16488	Argonaute linker 2 domain	507	553	2.7e-10	IPR032472	Argonaute linker 2 domain
g4935.t1	981	PF08699	Argonaute linker 1 domain	313	361	7.8e-14	IPR014811	Argonaute, linker 1 domain
g10106.t1	290	PF09808	Small nuclear RNA activating complex (SNAPc), subunit SNAP43	51	206	2.4e-18	IPR019188	Small nuclear RNA activating complex (SNAPc), subunit SNAP43
g27560.t2	655	PF10505	NMDA receptor-regulated gene protein 2 C-terminus	385	589	3.9e-48	IPR019535	Little elongation complex subunit 2 , C-terminal	GO:0008023
g3019.t1	108	PF05699	hAT family C-terminal dimerisation region	11	78	1.4e-06	IPR008906	HAT, C-terminal dimerisation domain	GO:0046983
g8444.t1	318	PF00400	WD domain, G-beta repeat	226	267	2.8e-07	IPR001680	WD40 repeat	GO:0005515
g8444.t1	318	PF00400	WD domain, G-beta repeat	99	135	2.7e-06	IPR001680	WD40 repeat	GO:0005515
g8444.t1	318	PF00400	WD domain, G-beta repeat	16	49	0.00036	IPR001680	WD40 repeat	GO:0005515
g19382.t1	541	PF00240	Ubiquitin family	13	82	5.2e-19	IPR000626	Ubiquitin domain	GO:0005515
g19382.t1	541	PF00627	UBA/TS-N domain	497	533	6.3e-08	IPR015940	Ubiquitin-associated domain
g15946.t1	405	PF14291	Domain of unknown function (DUF4371)	22	157	3.4e-19	IPR025398	Domain of unknown function DUF4371
g1322.t2	1962	PF00169	PH domain	809	910	1.2e-12	IPR001849	Pleckstrin homology domain
g1322.t2	1962	PF00621	RhoGEF domain	1379	1567	4.9e-42	IPR000219	Dbl homology (DH) domain	GO:0005089|GO:0035023
g1322.t2	1962	PF02196	Raf-like Ras-binding domain	1079	1152	8.6e-17	IPR003116	Raf-like Ras-binding	GO:0005057|GO:0007165
g25287.t1	325	PF07679	Immunoglobulin I-set domain	77	165	1.3e-10	IPR013098	Immunoglobulin I-set
g25287.t1	325	PF13927	Immunoglobulin domain	188	258	1.9e-10
g26964.t1	609	PF13637	Ankyrin repeats (many copies)	64	114	2e-08
g26964.t1	609	PF11904	GPCR-chaperone	178	471	1.5e-90	IPR021832	Ankyrin repeat domain-containing protein 13
g3063.t1	470	PF00271	Helicase conserved C-terminal domain	232	339	2e-25	IPR001650	Helicase, C-terminal
g3063.t1	470	PF00270	DEAD/DEAH box helicase	25	192	9.8e-49	IPR011545	DEAD/DEAH box helicase domain	GO:0003676|GO:0005524
g6817.t1	96	PF12937	F-box-like	34	79	9.6e-06	IPR001810	F-box domain	GO:0005515
g25817.t1	639	PF07714	Protein tyrosine kinase	196	467	6.9e-44	IPR001245	Serine-threonine/tyrosine-protein kinase catalytic domain	GO:0004672|GO:0006468
g25817.t1	639	PF00531	Death domain	21	95	4.9e-06	IPR000488	Death domain	GO:0005515|GO:0007165
g2379.t1	425	PF00043	Glutathione S-transferase, C-terminal domain	113	195	8e-16	IPR004046	Glutathione S-transferase, C-terminal
g2379.t1	425	PF02798	Glutathione S-transferase, N-terminal domain	3	77	3.3e-17	IPR004045	Glutathione S-transferase, N-terminal	GO:0005515
g2379.t1	425	PF00647	Elongation factor 1 gamma, conserved domain	265	370	1.1e-48	IPR001662	Translation elongation factor EF1B, gamma chain, conserved	GO:0003746|GO:0006414
g10517.t1	188	PF00168	C2 domain	90	178	1.8e-11	IPR000008	C2 domain	GO:0005515
g24135.t1	186	PF13833	EF-hand domain pair	41	88	4e-11	IPR002048	EF-hand domain	GO:0005509
g24135.t1	186	PF13499	EF-hand domain pair	100	173	3.8e-15	IPR002048	EF-hand domain	GO:0005509
g22995.t1	491	PF00202	Aminotransferase class-III	57	487	8.3e-108	IPR005814	Aminotransferase class-III	GO:0008483|GO:0030170
g682.t1	545	PF00169	PH domain	9	122	6.7e-19	IPR001849	Pleckstrin homology domain
g1706.t1	719	PF00271	Helicase conserved C-terminal domain	487	594	2.2e-27	IPR001650	Helicase, C-terminal
g1706.t1	719	PF00622	SPRY domain	126	238	9.4e-20	IPR003877	SPRY domain	GO:0005515
g1706.t1	719	PF00270	DEAD/DEAH box helicase	20	412	3.4e-59	IPR011545	DEAD/DEAH box helicase domain	GO:0003676|GO:0005524
g25015.t1	421	PF00018	SH3 domain	240	288	3.4e-14	IPR001452	SH3 domain	GO:0005515
g25015.t1	421	PF00018	SH3 domain	55	100	1.2e-12	IPR001452	SH3 domain	GO:0005515
g25015.t1	421	PF00017	SH2 domain	322	392	6.3e-18	IPR000980	SH2 domain
g25015.t1	421	PF14604	Variant SH3 domain	166	214	2.1e-13	IPR001452	SH3 domain	GO:0005515
g6864.t1	144	PF10251	Presenilin enhancer-2 subunit of gamma secretase	54	142	2.9e-30	IPR019379	Gamma-secretase aspartyl protease complex, presenilin enhancer-2 subunit
g25853.t1	303	PF04127	DNA / pantothenate metabolism flavoprotein	33	88	7.8e-05	IPR007085	DNA/pantothenate metabolism flavoprotein, C-terminal
g25853.t1	303	PF04127	DNA / pantothenate metabolism flavoprotein	161	254	1.1e-08	IPR007085	DNA/pantothenate metabolism flavoprotein, C-terminal
g2871.t1	249	PF10036	Putative carnitine deficiency-associated protein	4	248	9.1e-70	IPR019265	Protein of unknown function UPF0568
g26793.t1	206	PF17064	Sleepless protein	71	179	1.6e-53	IPR031424	Protein quiver	GO:0030431|GO:0032222|GO:0034235|GO:1903818
g8782.t1	143	PF11326	Protein of unknown function (DUF3128)	21	99	2e-12	IPR021475	Protein of unknown function DUF3128
g2338.t1	335	PF08127	Peptidase family C1 propeptide	26	64	1.1e-12	IPR012599	Peptidase C1A, propeptide	GO:0004197|GO:0050790
g2338.t1	335	PF00112	Papain family cysteine protease	86	328	2.2e-56	IPR000668	Peptidase C1A, papain C-terminal	GO:0006508|GO:0008234
g23161.t1	532	PF02782	FGGY family of carbohydrate kinases, C-terminal domain	267	450	2e-36	IPR018485	Carbohydrate kinase, FGGY, C-terminal	GO:0005975|GO:0016773
g23161.t1	532	PF00370	FGGY family of carbohydrate kinases, N-terminal domain	7	252	2.2e-47	IPR018484	Carbohydrate kinase, FGGY, N-terminal	GO:0005975|GO:0016773
g25215.t1	243	PF14529	Endonuclease-reverse transcriptase	110	220	1.2e-15	IPR005135	Endonuclease/exonuclease/phosphatase
g6801.t1	188	PF16002	Headcase protein	11	179	1.3e-81	IPR031947	Headcase, middle domain
g8662.t1	124	PF15092	Uncharacterised protein family UPF0728	40	104	5.1e-13	IPR027885	Uncharacterised protein family UPF0728
g20522.t1	181	PF00071	Ras family	5	164	9.5e-55	IPR001806	Small GTPase superfamily	GO:0005525|GO:0007264
g784.t1	567	PF00041	Fibronectin type III domain	387	468	1.9e-05	IPR003961	Fibronectin type III	GO:0005515
g784.t1	567	PF08205	CD80-like C2-set immunoglobulin domain	113	177	4.4e-10	IPR013162	CD80-like, immunoglobulin C2-set
g784.t1	567	PF13927	Immunoglobulin domain	210	276	6.4e-11
g2017.t1	979	PF07819	PGAP1-like protein	88	304	5.6e-62	IPR012908	GPI inositol-deacylase PGAP1-like	GO:0016788
g23341.t1	620	PF00732	GMC oxidoreductase	57	353	3.6e-81	IPR000172	Glucose-methanol-choline oxidoreductase, N-terminal	GO:0016614|GO:0050660|GO:0055114
g23341.t1	620	PF05199	GMC oxidoreductase	466	610	8e-40	IPR007867	Glucose-methanol-choline oxidoreductase, C-terminal	GO:0016614|GO:0055114
g1879.t1	1208	PF00122	E1-E2 ATPase	106	346	1.8e-08	IPR008250	P-type ATPase, A domain	GO:0000166|GO:0046872
g1879.t1	1208	PF16212	Phospholipid-translocating P-type ATPase C-terminal	885	1125	2.2e-77	IPR032630	P-type ATPase, C-terminal
g1879.t1	1208	PF16209	Phospholipid-translocating ATPase N-terminal	12	77	1.5e-24	IPR032631	P-type ATPase, N-terminal
g1879.t1	1208	PF13246	Cation transport ATPase (P-type)	532	611	8.1e-10
g22899.t1	802	PF01414	Delta serrate ligand	164	218	8.1e-21	IPR001774	Delta/Serrate/lag-2 (DSL) protein	GO:0007154|GO:0016020
g22899.t1	802	PF07657	N terminus of Notch ligand	25	91	6.5e-23	IPR011651	Notch ligand, N-terminal domain	GO:0007219|GO:0007275|GO:0016021
g22899.t1	802	PF00008	EGF-like domain	429	461	4.5e-08	IPR000742	EGF-like domain	GO:0005515
g22899.t1	802	PF00008	EGF-like domain	468	497	5.4e-08	IPR000742	EGF-like domain	GO:0005515
g22899.t1	802	PF00008	EGF-like domain	289	320	4e-07	IPR000742	EGF-like domain	GO:0005515
g22899.t1	802	PF00008	EGF-like domain	376	421	3.3e-05	IPR000742	EGF-like domain	GO:0005515
g22899.t1	802	PF00008	EGF-like domain	506	535	3.1e-05	IPR000742	EGF-like domain	GO:0005515
g22899.t1	802	PF00008	EGF-like domain	548	578	1.9e-07	IPR000742	EGF-like domain	GO:0005515
g22841.t1	232	PF06472	ABC transporter transmembrane region 2	113	218	7.9e-27	IPR011527	ABC transporter type 1, transmembrane domain	GO:0005524|GO:0006810|GO:0016021|GO:0042626|GO:0055085
g17688.t1	335	PF00078	Reverse transcriptase (RNA-dependent DNA polymerase)	235	331	8.3e-17	IPR000477	Reverse transcriptase domain
g13838.t1	845	PF14529	Endonuclease-reverse transcriptase	662	779	6.7e-27	IPR005135	Endonuclease/exonuclease/phosphatase
g24242.t3	395	PF00076	RNA recognition motif. (a.k.a. RRM, RBD, or RNP domain)	299	368	1.2e-21	IPR000504	RNA recognition motif domain	GO:0003676
g24242.t3	395	PF00076	RNA recognition motif. (a.k.a. RRM, RBD, or RNP domain)	124	156	3.3e-07	IPR000504	RNA recognition motif domain	GO:0003676
g24242.t3	395	PF00076	RNA recognition motif. (a.k.a. RRM, RBD, or RNP domain)	175	204	1.8e-05	IPR000504	RNA recognition motif domain	GO:0003676
g24242.t3	395	PF00076	RNA recognition motif. (a.k.a. RRM, RBD, or RNP domain)	38	108	2.2e-22	IPR000504	RNA recognition motif domain	GO:0003676
g25552.t1	1352	PF03662	Glycosyl hydrolase family 79, N-terminal domain	232	411	4.5e-10	IPR005199	Glycoside hydrolase, family 79	GO:0016020|GO:0016798
g19668.t1	2024	PF14765	Polyketide synthase dehydratase	818	972	1.1e-09	IPR020807	Polyketide synthase, dehydratase domain
g19668.t1	2024	PF08659	KR domain	1720	1898	8.1e-29	IPR013968	Polyketide synthase, ketoreductase domain
[truncated: 19,227 more rows]
