# Supplementary material for: Genome sequence of the banana aphid, Pentalonia nigronervosa Coquerel (Hemiptera: Aphididae) and its symbionts
Source: bioRxiv preprint, doi:10.1101/2020.04.25.060517, version 1 (2020-04-25)
Supplement: Supplementary Table 4 [file 060517_file06.xlsx]

## Sheet: Summary stats
Supplementary Table 4 sheet 1: Summary stats for OrthoFinder gene family clustering of proteomes listed in Supplementary Table 1.
Number of species	9
Number of genes	223889
Number of genes in orthogroups	204139
Number of unassigned genes	19750
Percentage of genes in orthogroups	91.2
Percentage of unassigned genes	8.8
Number of orthogroups	22759
Number of species-specific orthogroups	2986
Number of genes in species-specific orthogroups	11481
Percentage of genes in species-specific orthogroups	5.1
Mean orthogroup size	9
Median orthogroup size	8
G50 (assigned genes)	10
G50 (all genes)	9
O50 (assigned genes)	4795
O50 (all genes)	5833
Number of orthogroups with all species present	7587
Number of single-copy orthogroups	4721

## Sheet: OG gene counts per species
Supplementary Table 4 sheet 2: OrthoFinder orthogroup per species gene counts.
Orthogroup	Agly	Apis	Cced	Dnox	Mcer	MperO	Pnig	Rmai	Rpad	Total
OG0000000	9	33	35	59	8	78	39	22	73	356
OG0000001	14	32	5	94	45	79	32	3	44	348
OG0000002	17	47	6	29	75	36	11	9	15	245
OG0000003	9	38	15	34	25	63	9	24	18	235
OG0000004	9	18	32	40	4	36	28	16	51	234
OG0000005	7	27	30	46	6	63	6	1	41	227
OG0000006	13	31	25	48	33	25	11	6	31	223
OG0000007	12	23	2	20	35	54	38	13	17	214
OG0000008	14	32	2	13	66	50	4	11	21	213
OG0000009	16	38	3	50	43	25	19	2	16	212
OG0000010	27	6	6	16	39	25	63	9	11	202
OG0000011	33	11	5	14	33	25	50	10	5	186
OG0000012	13	36	3	28	44	27	20	3	11	185
OG0000013	5	18	4	26	36	20	48	7	20	184
OG0000014	15	50	2	21	30	35	19	2	10	184
OG0000015	5	34	3	20	39	31	19	5	18	174
OG0000016	1	14	1	101	2	37	2	0	10	168
OG0000017	14	27	0	13	32	28	32	4	17	167
OG0000018	3	15	11	40	8	43	7	7	32	166
OG0000019	7	16	40	37	17	3	15	7	21	163
OG0000020	6	27	1	25	48	31	12	1	9	160
OG0000021	3	12	29	50	14	5	8	2	36	159
OG0000022	7	16	3	19	43	30	19	1	15	153
OG0000023	2	33	0	20	29	37	20	4	7	152
OG0000024	1	3	4	91	3	27	7	0	15	151
OG0000025	6	19	3	11	15	28	47	7	15	151
OG0000026	4	23	2	10	62	26	2	12	10	151
OG0000027	11	19	4	13	17	20	49	5	12	150
OG0000028	5	11	5	40	4	49	5	10	21	150
OG0000029	8	26	2	17	38	32	7	6	11	147
OG0000030	8	24	3	16	21	32	26	2	14	146
OG0000031	3	40	11	14	17	19	32	1	9	146
OG0000032	0	15	5	33	3	40	3	5	42	146
OG0000033	6	9	1	37	17	28	9	14	23	144
OG0000034	10	26	10	9	22	19	17	17	14	144
OG0000035	5	4	12	42	6	13	27	3	31	143
OG0000036	19	24	16	6	10	13	14	27	14	143
OG0000037	8	30	1	20	23	34	10	5	12	143
OG0000038	1	9	12	41	5	33	13	1	26	141
OG0000039	3	32	26	26	20	7	13	5	9	141
OG0000040	4	12	0	61	19	30	7	1	7	141
OG0000041	7	65	0	9	14	9	11	10	13	138
OG0000042	1	5	17	71	3	16	2	1	22	138
OG0000043	1	32	0	11	39	30	3	5	17	138
OG0000044	2	29	5	25	7	59	0	4	6	137
OG0000045	15	15	7	10	13	6	18	35	16	135
OG0000046	4	24	2	22	52	14	3	4	10	135
OG0000047	1	7	55	33	1	14	3	1	20	135
OG0000048	0	8	7	34	7	34	11	5	29	135
OG0000049	5	29	6	15	28	17	26	0	8	134
OG0000050	34	17	2	4	38	8	19	4	7	133
OG0000051	4	40	2	13	36	25	1	3	8	132
OG0000052	0	15	2	23	4	50	4	4	30	132
OG0000053	0	72	0	13	16	28	2	0	0	131
OG0000054	11	31	2	12	30	31	4	2	6	129
OG0000055	5	14	17	33	19	6	20	4	10	128
OG0000056	7	27	2	20	29	18	7	7	10	127
OG0000057	21	14	4	17	16	14	31	3	6	126
OG0000058	14	5	10	7	28	6	44	5	7	126
OG0000059	7	14	7	27	25	4	24	2	16	126
OG0000060	0	8	6	42	34	11	13	1	9	124
OG0000061	26	37	0	2	13	28	12	2	3	123
OG0000062	9	18	0	25	32	26	3	4	6	123
OG0000063	16	38	1	1	16	16	5	12	18	123
OG0000064	0	8	13	41	8	15	5	3	30	123
OG0000065	4	43	1	16	8	44	0	1	4	121
OG0000066	10	24	4	9	21	14	13	15	11	121
OG0000067	17	24	15	4	6	15	14	13	13	121
OG0000068	43	33	3	1	10	7	19	0	3	119
OG0000069	3	12	6	11	29	19	23	7	9	119
OG0000070	5	32	2	1	7	33	1	13	23	117
OG0000071	2	13	17	21	3	17	19	9	12	113
OG0000072	18	8	1	15	14	13	26	2	16	113
OG0000073	10	13	10	3	20	20	11	8	18	113
OG0000074	7	14	2	25	20	23	2	6	14	113
OG0000075	0	0	0	2	2	0	108	0	0	112
OG0000076	5	8	4	11	27	26	14	1	14	110
OG0000077	6	9	3	11	16	15	39	1	9	109
OG0000078	0	26	5	29	11	29	3	1	5	109
OG0000079	11	0	1	19	8	24	26	17	2	108
OG0000080	11	11	2	5	27	16	30	0	6	108
OG0000081	21	6	3	3	27	6	37	0	5	108
OG0000082	7	11	4	16	12	11	31	4	12	108
OG0000083	15	1	6	17	14	17	17	4	17	108
OG0000084	10	17	18	4	11	17	6	11	13	107
OG0000085	2	25	2	13	17	16	18	4	10	107
OG0000086	1	36	2	12	9	18	23	4	2	107
OG0000087	8	20	0	13	38	18	3	3	3	106
OG0000088	5	8	4	11	33	8	24	7	6	106
OG0000089	4	23	0	15	22	18	11	1	12	106
OG0000090	19	24	10	3	11	16	8	0	13	104
OG0000091	7	20	0	4	31	20	9	3	10	104
OG0000092	7	4	8	12	23	9	33	6	1	103
OG0000093	20	18	17	4	8	14	11	0	9	101
OG0000094	4	36	0	7	14	15	24	1	0	101
OG0000095	0	1	1	10	9	4	62	7	7	101
OG0000096	15	6	0	11	6	19	24	0	19	100
OG0000097	21	15	0	6	12	15	7	11	13	100
OG0000098	9	22	11	5	12	10	7	14	10	100
OG0000099	3	3	7	18	12	10	35	4	8	100
OG0000100	2	23	0	14	27	26	1	2	5	100
OG0000101	2	5	35	22	14	4	8	1	8	99
OG0000102	0	7	0	3	41	2	46	0	0	99
OG0000103	5	11	2	11	0	1	49	1	18	98
OG0000104	0	3	4	47	0	25	1	8	10	98
OG0000105	6	34	1	13	16	25	1	0	1	97
OG0000106	2	9	4	27	1	34	5	0	15	97
OG0000107	10	2	9	14	15	1	31	2	11	95
OG0000108	4	24	0	12	29	16	5	0	4	94
OG0000109	1	10	0	5	4	4	65	1	4	94
OG0000110	0	26	4	19	6	26	3	1	9	94
OG0000111	18	15	1	16	27	9	0	1	5	92
OG0000112	1	9	5	30	3	22	6	1	15	92
OG0000113	0	92	0	0	0	0	0	0	0	92
OG0000114	4	15	0	7	42	16	1	3	3	91
OG0000115	2	10	22	23	7	3	6	2	16	91
OG0000116	5	14	0	12	25	17	3	1	13	90
OG0000117	4	12	0	17	23	17	6	4	7	90
OG0000118	8	4	2	8	44	15	0	0	8	89
OG0000119	7	8	1	15	19	10	17	4	8	89
OG0000120	1	29	1	11	20	9	6	6	6	89
OG0000121	8	7	1	1	10	14	8	26	13	88
OG0000122	7	20	3	11	29	12	3	0	3	88
OG0000123	1	10	1	24	17	7	18	6	4	88
OG0000124	7	19	0	4	19	14	7	7	9	86
OG0000125	5	33	1	8	16	11	2	1	9	86
OG0000126	5	26	4	4	14	6	14	2	11	86
OG0000127	2	10	1	22	4	10	4	17	16	86
OG0000128	20	14	0	2	13	21	10	1	4	85
OG0000129	8	4	0	2	26	11	29	4	1	85
OG0000130	5	24	1	4	25	14	1	3	8	85
OG0000131	3	15	1	10	24	13	14	0	5	85
OG0000132	1	16	0	13	12	23	11	1	8	85
OG0000133	6	11	0	14	16	23	4	2	7	83
OG0000134	3	16	2	11	20	11	9	2	9	83
OG0000135	16	19	7	2	5	6	21	0	6	82
OG0000136	5	7	0	4	12	20	19	12	3	82
OG0000137	4	23	10	10	18	8	5	1	3	82
OG0000138	8	8	4	5	10	2	31	1	12	81
OG0000139	1	2	28	4	2	12	17	5	9	80
OG0000140	0	80	0	0	0	0	0	0	0	80
OG0000141	3	4	6	11	15	7	7	8	18	79
OG0000142	3	13	0	6	6	5	36	1	9	79
OG0000143	5	14	3	12	8	8	20	7	2	79
OG0000144	0	9	7	20	3	13	2	0	25	79
OG0000145	0	2	4	7	19	8	30	5	4	79
OG0000146	0	0	66	3	0	0	10	0	0	79
OG0000147	44	6	2	12	8	4	0	0	2	78
OG0000148	8	13	0	8	18	11	4	3	13	78
OG0000149	3	9	1	9	12	19	1	20	4	78
OG0000150	5	6	3	9	12	14	12	6	10	77
OG0000151	1	12	8	18	7	12	4	0	15	77
OG0000152	2	13	1	7	18	14	10	1	10	76
OG0000153	2	15	1	16	20	9	6	2	5	76
OG0000154	3	26	0	9	15	14	3	1	5	76
OG0000155	2	14	2	9	16	17	9	2	5	76
OG0000156	0	4	27	24	1	14	0	2	4	76
OG0000157	2	8	1	19	13	7	20	0	5	75
OG0000158	5	0	4	5	16	16	16	4	9	75
OG0000159	9	9	9	4	9	9	4	6	16	75
OG0000160	3	15	1	12	18	14	1	5	5	74
OG0000161	3	7	13	6	2	17	13	1	12	74
OG0000162	0	6	12	3	8	30	1	2	12	74
OG0000163	5	10	1	9	17	24	1	1	5	73
OG0000164	72	0	0	0	0	0	0	1	0	73
OG0000165	2	11	4	13	16	6	12	1	8	73
OG0000166	1	8	0	6	11	14	11	14	8	73
OG0000167	21	17	2	3	6	11	2	3	7	72
OG0000168	9	4	1	17	17	6	12	0	6	72
OG0000169	1	12	1	9	10	17	9	6	7	72
OG0000170	2	8	0	2	29	12	3	6	9	71
OG0000171	2	7	1	12	4	25	2	0	18	71
OG0000172	3	22	0	5	11	18	6	2	4	71
OG0000173	8	14	1	1	13	9	17	0	7	70
OG0000174	18	10	0	6	11	17	3	2	3	70
OG0000175	3	21	0	4	16	15	3	2	6	70
OG0000176	4	1	14	7	15	4	15	1	8	69
OG0000177	11	9	3	5	9	1	5	16	10	69
OG0000178	6	18	3	4	25	4	6	0	3	69
OG0000179	3	9	2	6	13	15	6	0	14	68
OG0000180	4	8	4	5	4	7	31	1	4	68
OG0000181	4	16	1	6	10	12	14	0	5	68
OG0000182	5	11	0	7	23	20	0	0	2	68
OG0000183	2	1	8	19	8	3	11	5	11	68
OG0000184	2	17	2	6	3	11	16	2	9	68
OG0000185	1	3	0	3	11	48	0	0	2	68
OG0000186	0	68	0	0	0	0	0	0	0	68
OG0000187	12	1	0	2	24	1	25	0	2	67
OG0000188	6	9	1	11	11	15	1	2	11	67
OG0000189	7	5	8	10	10	2	13	1	11	67
OG0000190	1	5	2	21	1	23	1	0	13	67
OG0000191	0	0	0	1	52	14	0	0	0	67
OG0000192	8	1	2	0	6	13	32	1	3	66
OG0000193	3	2	1	6	15	26	8	0	5	66
OG0000194	3	15	0	10	13	12	4	1	8	66
OG0000195	1	9	6	14	13	8	6	1	8	66
OG0000196	16	9	1	11	8	8	9	0	3	65
OG0000197	2	5	8	5	4	15	20	0	6	65
OG0000198	6	13	0	2	20	10	5	4	5	65
OG0000199	4	3	1	3	2	9	13	26	4	65
OG0000200	7	13	0	5	11	15	6	1	6	64
OG0000201	6	9	6	3	6	14	6	4	10	64
OG0000202	1	13	5	11	9	9	6	6	4	64
OG0000203	0	14	0	3	11	13	10	6	7	64
OG0000204	0	6	7	31	0	9	4	3	4	64
OG0000205	13	12	0	8	15	5	6	1	3	63
OG0000206	1	11	1	5	15	4	22	0	4	63
OG0000207	1	15	15	1	2	2	6	14	7	63
OG0000208	4	15	1	4	12	3	9	9	6	63
OG0000209	1	8	0	24	7	13	1	2	7	63
OG0000210	2	19	0	11	7	14	7	0	3	63
OG0000211	5	7	0	9	16	6	17	0	3	63
OG0000212	0	0	0	0	0	0	61	2	0	63
OG0000213	21	34	0	1	6	0	0	0	0	62
OG0000214	4	45	1	2	2	0	4	1	3	62
OG0000215	2	5	1	6	26	22	0	0	0	62
OG0000216	8	1	1	7	9	3	29	1	3	62
OG0000217	2	9	0	10	6	26	3	2	4	62
OG0000218	3	8	4	3	6	12	21	1	4	62
OG0000219	1	5	1	5	30	7	0	3	10	62
OG0000220	0	28	0	5	0	25	1	0	3	62
OG0000221	0	62	0	0	0	0	0	0	0	62
OG0000222	2	0	7	11	1	23	4	3	10	61
OG0000223	6	10	8	2	10	9	10	4	2	61
OG0000224	3	7	1	4	8	10	20	1	7	61
OG0000225	1	3	13	17	2	7	3	1	14	61
OG0000226	7	8	4	4	8	7	2	11	10	61
OG0000227	3	4	1	1	14	15	15	1	7	61
OG0000228	3	8	0	6	16	13	6	2	7	61
OG0000229	3	10	4	17	12	12	2	0	1	61
OG0000230	0	17	1	12	17	8	5	1	0	61
OG0000231	7	10	6	6	6	8	5	7	5	60
OG0000232	2	24	1	3	16	6	1	3	4	60
OG0000233	6	8	2	6	8	7	7	7	9	60
OG0000234	6	15	5	3	6	6	9	5	5	60
OG0000235	0	22	1	12	0	22	0	0	3	60
OG0000236	0	8	2	5	18	2	14	5	6	60
OG0000237	0	0	0	0	0	60	0	0	0	60
OG0000238	10	25	0	6	4	9	3	1	1	59
OG0000239	4	2	4	0	6	3	1	14	25	59
OG0000240	1	45	1	6	2	1	1	1	1	59
OG0000241	3	16	0	6	5	12	13	1	3	59
OG0000242	2	7	1	10	19	6	9	2	3	59
OG0000243	1	14	1	1	15	15	3	1	8	59
OG0000244	1	15	5	4	16	4	5	2	7	59
OG0000245	1	14	0	2	26	13	1	0	2	59
OG0000246	0	42	1	0	0	16	0	0	0	59
OG0000247	0	2	23	22	2	4	2	1	3	59
OG0000248	0	3	19	13	7	7	1	1	8	59
OG0000249	28	24	2	2	0	1	0	0	1	58
OG0000250	1	7	0	3	12	6	1	24	4	58
OG0000251	6	9	0	5	25	3	2	2	6	58
OG0000252	3	4	2	6	17	0	14	5	7	58
OG0000253	5	5	3	1	10	11	7	12	3	57
OG0000254	0	17	0	0	0	38	2	0	0	57
OG0000255	0	5	0	23	0	27	0	0	2	57
OG0000256	0	0	49	2	0	1	0	0	5	57
OG0000257	12	24	0	3	14	3	0	0	0	56
OG0000258	4	8	1	8	5	7	13	2	8	56
OG0000259	1	10	2	13	15	1	10	0	4	56
OG0000260	1	11	0	8	12	12	7	0	5	56
OG0000261	2	4	2	15	0	10	9	2	12	56
OG0000262	0	5	3	7	5	4	18	2	12	56
OG0000263	15	2	0	3	12	9	13	0	1	55
OG0000264	5	10	5	5	6	2	17	1	4	55
OG0000265	1	10	3	6	3	30	0	0	2	55
OG0000266	4	10	1	1	12	16	1	4	6	55
OG0000267	3	7	0	9	21	7	0	1	7	55
OG0000268	1	7	1	3	15	21	2	3	2	55
OG0000269	0	54	0	0	1	0	0	0	0	55
OG0000270	0	11	1	9	5	5	14	5	5	55
OG0000271	0	11	0	14	12	16	0	0	2	55
OG0000272	9	4	1	5	6	7	19	2	1	54
OG0000273	10	8	5	1	8	1	13	0	8	54
OG0000274	2	13	2	8	7	10	4	0	8	54
OG0000275	2	5	1	3	3	7	12	11	10	54
OG0000276	5	7	0	8	6	6	17	1	4	54
OG0000277	3	0	0	11	8	9	0	2	21	54
OG0000278	1	4	2	10	1	10	2	5	19	54
OG0000279	1	31	3	2	9	1	3	2	2	54
OG0000280	5	24	0	0	5	17	1	2	0	54
OG0000281	2	12	0	8	13	11	3	1	4	54
OG0000282	0	17	0	2	11	1	12	5	6	54
OG0000283	0	0	0	1	0	49	3	1	0	54
OG0000284	0	0	0	1	1	52	0	0	0	54
OG0000285	1	47	0	0	1	0	1	1	2	53
OG0000286	7	6	5	7	7	6	7	1	7	53
OG0000287	7	7	9	3	8	6	4	4	5	53
OG0000288	4	15	0	7	14	8	0	5	0	53
OG0000289	6	2	0	4	12	3	11	3	12	53
OG0000290	4	5	0	6	13	12	10	1	2	53
OG0000291	2	7	0	4	22	14	0	1	3	53
OG0000292	1	12	1	6	15	16	0	0	2	53
OG0000293	9	3	1	3	7	14	8	2	5	52
OG0000294	8	2	7	8	8	6	6	0	7	52
OG0000295	2	17	1	4	8	15	1	2	2	52
OG0000296	4	5	7	4	7	4	12	4	5	52
OG0000297	3	3	0	12	6	12	2	3	11	52
OG0000298	2	10	1	2	19	7	3	4	4	52
OG0000299	2	8	2	6	13	6	15	0	0	52
OG0000300	3	4	6	0	3	22	12	0	2	52
OG0000301	1	7	0	2	9	23	9	0	1	52
OG0000302	1	11	1	17	7	5	4	0	6	52
OG0000303	3	7	0	5	5	5	19	1	7	52
OG0000304	0	52	0	0	0	0	0	0	0	52
OG0000305	0	2	2	9	1	20	3	1	14	52
OG0000306	7	0	2	0	6	3	31	1	1	51
OG0000307	7	9	1	2	3	3	7	12	7	51
OG0000308	5	1	3	12	10	1	16	0	3	51
OG0000309	3	13	1	3	6	4	6	7	8	51
OG0000310	2	14	1	8	8	4	4	4	6	51
OG0000311	5	25	0	3	5	8	3	1	1	51
OG0000312	2	14	0	4	8	11	3	7	2	51
OG0000313	2	9	1	4	11	16	6	0	2	51
OG0000314	1	0	2	1	6	7	31	0	3	51
OG0000315	0	32	5	1	1	8	0	0	4	51
OG0000316	0	10	1	6	8	11	4	6	5	51
OG0000317	6	3	0	10	5	7	5	0	14	50
OG0000318	9	6	0	1	13	3	16	0	2	50
OG0000319	1	4	1	16	1	12	1	3	11	50
OG0000320	3	5	2	4	6	9	7	5	9	50
OG0000321	2	2	4	5	12	11	8	3	3	50
OG0000322	2	12	3	12	9	5	1	1	5	50
OG0000323	1	3	0	5	1	34	1	0	5	50
OG0000324	1	6	11	7	0	12	1	0	12	50
OG0000325	0	13	0	6	18	4	5	2	2	50
OG0000326	0	14	0	2	2	25	0	2	5	50
OG0000327	0	5	0	30	8	3	1	0	3	50
OG0000328	0	10	3	15	7	0	14	0	1	50
OG0000329	0	13	0	1	15	21	0	0	0	50
OG0000330	4	11	6	6	4	6	3	5	4	49
OG0000331	4	17	1	0	6	11	2	5	3	49
OG0000332	7	6	4	4	5	5	6	6	6	49
OG0000333	9	6	1	6	6	6	6	4	5	49
OG0000334	4	5	2	3	7	1	21	2	4	49
OG0000335	3	9	1	4	10	3	12	3	4	49
OG0000336	2	6	0	3	13	8	6	0	11	49
OG0000337	6	2	0	5	5	8	17	2	4	49
OG0000338	3	20	0	7	7	8	2	0	2	49
OG0000339	3	9	1	2	17	5	2	5	5	49
OG0000340	2	15	1	7	11	7	1	3	2	49
OG0000341	0	11	0	7	18	7	2	1	3	49
OG0000342	0	7	3	6	9	6	11	0	7	49
OG0000343	0	2	2	1	1	0	39	0	4	49
OG0000344	0	1	4	24	1	6	0	0	13	49
OG0000345	4	8	0	7	10	6	13	0	0	48
OG0000346	3	7	5	3	7	2	15	2	4	48
OG0000347	1	7	0	4	9	19	1	4	3	48
OG0000348	7	1	1	4	5	4	18	1	7	48
OG0000349	3	9	0	4	9	20	0	1	2	48
OG0000350	3	5	2	10	4	5	16	0	3	48
OG0000351	2	10	0	4	4	1	24	3	0	48
OG0000352	5	3	0	4	10	5	8	2	11	48
OG0000353	0	45	0	1	0	0	2	0	0	48
OG0000354	0	1	47	0	0	0	0	0	0	48
OG0000355	0	0	48	0	0	0	0	0	0	48
OG0000356	0	0	20	26	0	1	0	0	1	48
OG0000357	3	12	2	7	7	3	7	2	4	47
OG0000358	2	5	5	18	4	0	3	0	10	47
OG0000359	3	4	0	0	8	6	1	6	19	47
OG0000360	2	12	0	4	11	6	11	0	1	47
OG0000361	2	22	5	1	4	2	3	3	5	47
OG0000362	2	4	1	8	13	2	14	1	2	47
OG0000363	14	2	1	4	4	6	14	0	2	47
OG0000364	1	16	0	8	10	8	0	2	2	47
OG0000365	3	6	0	3	12	6	16	0	1	47
OG0000366	1	1	4	7	4	3	24	1	2	47
OG0000367	6	9	0	2	8	18	0	1	3	47
OG0000368	2	4	2	4	6	5	13	10	1	47
OG0000369	0	34	0	0	0	13	0	0	0	47
OG0000370	0	47	0	0	0	0	0	0	0	47
OG0000371	0	0	0	0	0	0	0	21	26	47
OG0000372	1	7	0	2	6	25	0	1	4	46
OG0000373	3	16	0	2	4	6	8	3	4	46
OG0000374	1	15	1	1	17	10	0	0	1	46
OG0000375	4	6	0	9	7	11	6	1	2	46
OG0000376	2	4	1	8	12	8	7	0	4	46
OG0000377	1	13	0	0	12	6	6	2	6	46
OG0000378	3	8	1	0	6	2	18	2	6	46
OG0000379	1	5	2	5	2	8	14	2	7	46
OG0000380	1	9	0	19	0	9	0	1	7	46
OG0000381	1	8	0	5	19	9	0	0	4	46
OG0000382	0	46	0	0	0	0	0	0	0	46
OG0000383	0	12	1	11	1	10	9	0	2	46
OG0000384	0	45	0	0	0	0	1	0	0	46
OG0000385	0	0	12	11	0	3	0	1	19	46
OG0000386	3	5	1	2	3	3	27	0	1	45
OG0000387	20	8	0	1	1	1	14	0	0	45
OG0000388	37	0	0	0	0	8	0	0	0	45
OG0000389	7	9	0	2	10	11	0	0	6	45
OG0000390	1	2	1	2	20	11	0	0	8	45
OG0000391	19	7	3	3	6	4	1	1	1	45
OG0000392	3	1	3	1	5	10	10	7	5	45
OG0000393	1	6	6	4	4	5	5	6	8	45
OG0000394	1	9	3	18	3	10	0	0	1	45
OG0000395	3	3	1	5	9	1	18	0	5	45
OG0000396	3	0	1	3	2	27	3	5	1	45
OG0000397	0	2	0	6	11	3	22	0	1	45
OG0000398	0	4	9	12	4	5	9	1	1	45
OG0000399	0	3	1	21	5	3	5	4	3	45
OG0000400	0	0	0	0	38	7	0	0	0	45
OG0000401	18	7	0	1	1	3	14	0	0	44
OG0000402	7	1	3	3	1	3	3	17	6	44
OG0000403	4	4	5	7	5	5	4	4	6	44
OG0000404	4	2	0	9	4	1	3	21	0	44
OG0000405	2	5	1	4	13	5	2	1	11	44
OG0000406	1	3	1	12	7	2	3	7	8	44
OG0000407	0	5	1	1	9	0	17	8	3	44
OG0000408	4	19	0	2	8	3	3	1	3	43
OG0000409	5	6	0	2	7	20	0	0	3	43
OG0000410	6	9	0	8	7	3	3	0	7	43
OG0000411	4	7	0	5	3	7	10	2	5	43
OG0000412	4	4	9	4	5	4	4	5	4	43
OG0000413	5	2	5	6	4	2	12	1	6	43
OG0000414	2	8	0	6	13	12	1	0	1	43
OG0000415	3	15	0	3	11	10	0	0	1	43
OG0000416	2	9	1	5	12	7	2	3	2	43
OG0000417	2	15	0	3	13	7	0	2	1	43
OG0000418	1	8	0	4	20	8	0	0	2	43
OG0000419	1	9	4	5	9	9	2	1	3	43
OG0000420	1	0	0	2	4	1	35	0	0	43
OG0000421	2	3	1	5	13	4	9	0	6	43
OG0000422	1	7	2	1	6	2	13	4	7	43
OG0000423	0	42	0	0	0	1	0	0	0	43
OG0000424	0	7	0	13	2	18	0	1	2	43
OG0000425	0	9	0	14	0	4	0	1	15	43
OG0000426	0	2	4	3	2	4	17	0	11	43
OG0000427	0	0	0	3	8	2	30	0	0	43
OG0000428	42	0	0	0	0	0	0	0	0	42
OG0000429	11	22	0	0	0	7	0	0	2	42
OG0000430	6	7	0	4	7	0	15	0	3	42
OG0000431	2	8	0	3	16	9	1	1	2	42
OG0000432	4	12	0	2	13	6	1	2	2	42
OG0000433	6	7	0	8	13	2	3	1	2	42
OG0000434	1	6	4	4	5	6	14	0	2	42
OG0000435	6	15	0	19	0	2	0	0	0	42
OG0000436	1	11	0	1	5	19	1	2	2	42
OG0000437	3	4	7	3	4	5	8	1	7	42
OG0000438	2	4	0	5	4	1	25	0	1	42
OG0000439	2	8	0	2	12	14	1	1	2	42
OG0000440	1	1	0	0	0	40	0	0	0	42
OG0000441	1	14	1	6	7	7	0	3	3	42
OG0000442	1	7	0	6	8	15	1	2	2	42
OG0000443	2	6	1	3	12	5	13	0	0	42
OG0000444	0	4	3	9	0	5	3	1	17	42
OG0000445	5	3	2	6	13	6	2	0	4	41
OG0000446	4	4	0	6	8	11	4	1	3	41
OG0000447	9	4	0	3	4	3	7	5	6	41
OG0000448	5	0	0	28	3	1	0	0	4	41
OG0000449	3	7	6	0	4	9	4	4	4	41
OG0000450	1	6	0	3	15	9	3	1	3	41
OG0000451	3	4	2	2	6	4	2	9	9	41
OG0000452	3	1	0	0	4	32	1	0	0	41
OG0000453	1	15	2	7	10	2	0	2	2	41
OG0000454	1	15	0	3	11	8	0	0	3	41
OG0000455	1	1	12	16	2	1	2	4	2	41
OG0000456	0	20	0	8	7	6	0	0	0	41
OG0000457	0	15	1	2	10	9	3	1	0	41
OG0000458	0	9	1	2	11	16	0	1	1	41
OG0000459	0	1	2	24	2	6	0	1	5	41
OG0000460	0	1	0	11	0	15	2	0	12	41
OG0000461	5	4	0	5	8	5	11	0	2	40
OG0000462	4	3	1	7	3	7	15	0	0	40
OG0000463	3	10	5	2	6	7	2	2	3	40
OG0000464	1	6	0	18	3	5	1	0	6	40
OG0000465	4	4	0	2	8	11	6	1	4	40
OG0000466	2	22	0	1	8	7	0	0	0	40
OG0000467	1	0	1	5	6	3	16	0	8	40
OG0000468	2	3	1	11	1	0	5	0	17	40
OG0000469	2	4	0	4	7	12	6	1	4	40
OG0000470	0	36	0	1	0	0	0	1	2	40
OG0000471	0	13	0	2	8	12	0	3	2	40
OG0000472	0	8	0	4	8	2	15	1	2	40
OG0000473	0	8	0	6	12	9	0	2	3	40
OG0000474	0	10	1	3	8	4	4	7	3	40
OG0000475	4	6	0	12	14	2	0	0	1	39
OG0000476	4	7	1	2	3	5	1	10	6	39
OG0000477	1	2	0	3	3	16	1	7	6	39
OG0000478	3	6	7	2	4	5	4	4	4	39
OG0000479	3	15	3	1	4	2	2	3	6	39
OG0000480	16	7	2	3	2	2	4	2	1	39
OG0000481	4	6	1	4	12	8	0	0	4	39
OG0000482	7	2	3	6	4	6	10	1	0	39
OG0000483	2	1	0	2	16	13	1	3	1	39
OG0000484	1	8	1	4	7	7	7	2	2	39
OG0000485	3	4	0	10	12	6	0	0	4	39
OG0000486	1	4	0	13	8	7	4	0	2	39
OG0000487	1	6	1	8	7	14	0	2	0	39
OG0000488	0	5	0	10	8	9	1	0	6	39
OG0000489	0	2	5	4	6	4	4	0	14	39
OG0000490	0	5	16	12	2	3	0	0	1	39
OG0000491	0	36	0	0	0	3	0	0	0	39
OG0000492	0	1	1	14	2	1	6	0	14	39
OG0000493	3	6	4	12	5	2	6	0	0	38
OG0000494	2	10	0	3	10	7	0	2	4	38
OG0000495	1	20	0	4	4	5	3	1	0	38
OG0000496	7	4	3	2	6	2	3	1	10	38
OG0000497	5	10	0	1	7	8	2	5	0	38
OG0000498	2	7	1	5	10	6	0	2	5	38
OG0000499	3	9	1	3	4	6	3	3	6	38
OG0000500	2	6	0	5	9	7	6	0	3	38
OG0000501	4	0	3	6	3	10	11	0	1	38
OG0000502	6	4	1	4	8	6	6	0	3	38
OG0000503	2	2	3	2	4	7	10	0	8	38
OG0000504	0	3	0	1	11	13	7	1	2	38
OG0000505	0	1	0	4	1	19	4	1	8	38
OG0000506	0	0	0	1	3	2	28	1	3	38
OG0000507	0	0	0	0	0	0	38	0	0	38
OG0000508	1	8	0	4	13	10	0	0	1	37
OG0000509	13	6	1	1	1	1	4	4	6	37
OG0000510	2	1	7	14	0	4	0	1	8	37
OG0000511	9	8	0	1	3	6	4	3	3	37
OG0000512	3	5	0	2	2	0	12	0	13	37
OG0000513	4	4	3	4	6	4	4	4	4	37
OG0000514	2	0	0	2	3	1	29	0	0	37
OG0000515	4	1	4	0	2	9	14	0	3	37
OG0000516	1	7	2	2	11	2	2	2	8	37
OG0000517	3	8	0	6	3	4	11	1	1	37
OG0000518	2	8	0	5	9	8	0	1	4	37
OG0000519	1	7	2	1	20	2	2	0	2	37
OG0000520	1	8	0	5	14	7	0	0	2	37
OG0000521	2	7	0	6	13	5	1	0	3	37
OG0000522	1	3	0	7	8	3	5	1	9	37
OG0000523	3	5	1	2	18	4	0	1	3	37
OG0000524	2	11	0	2	12	3	0	0	7	37
OG0000525	1	8	10	7	5	2	3	1	0	37
OG0000526	0	22	0	13	1	0	0	0	1	37
OG0000527	0	5	0	3	8	9	10	1	1	37
OG0000528	0	3	0	0	10	24	0	0	0	37
OG0000529	0	4	2	11	0	16	0	0	4	37
OG0000530	0	1	0	7	4	1	21	0	3	37
OG0000531	0	0	37	0	0	0	0	0	0	37
OG0000532	0	0	2	32	0	1	0	0	2	37
OG0000533	0	0	0	0	0	1	36	0	0	37
OG0000534	2	5	0	1	21	6	0	0	1	36
OG0000535	1	9	0	1	10	11	0	2	2	36
OG0000536	1	8	2	3	6	7	6	1	2	36
OG0000537	2	7	0	1	4	5	1	7	9	36
OG0000538	4	17	0	3	4	1	6	0	1	36
OG0000539	1	0	2	5	9	8	4	1	6	36
OG0000540	2	21	0	2	5	4	0	0	2	36
OG0000541	3	1	0	0	0	0	0	0	32	36
OG0000542	2	0	1	4	1	1	26	0	1	36
OG0000543	2	10	0	13	2	3	1	1	4	36
OG0000544	1	3	5	8	6	2	0	1	10	36
OG0000545	1	12	0	2	12	0	3	3	3	36
OG0000546	2	6	1	2	4	8	11	1	1	36
OG0000547	4	4	1	1	8	4	14	0	0	36
OG0000548	1	0	2	5	1	1	23	0	3	36
OG0000549	0	36	0	0	0	0	0	0	0	36
OG0000550	0	6	0	4	5	13	4	0	4	36
OG0000551	0	0	0	0	0	36	0	0	0	36
OG0000552	7	3	0	2	12	0	11	0	0	35
OG0000553	3	3	0	2	6	0	20	0	1	35
OG0000554	7	5	0	2	5	1	12	1	2	35
OG0000555	8	11	0	6	3	5	0	1	1	35
OG0000556	3	4	2	5	6	5	4	3	3	35
OG0000557	3	6	2	4	15	4	0	0	1	35
OG0000558	5	3	0	1	7	2	17	0	0	35
OG0000559	1	1	0	6	6	10	8	1	2	35
OG0000560	3	8	1	0	13	1	4	2	3	35
OG0000561	1	7	0	8	11	6	0	1	1	35
OG0000562	2	5	1	4	6	11	4	1	1	35
OG0000563	4	5	1	4	10	4	3	2	2	35
OG0000564	2	12	1	1	5	2	11	0	1	35
OG0000565	3	3	1	2	7	5	5	7	2	35
OG0000566	3	2	0	7	1	4	12	1	5	35
OG0000567	1	5	4	2	6	3	3	5	6	35
OG0000568	1	10	1	5	3	3	12	0	0	35
OG0000569	2	1	3	1	1	2	2	22	1	35
OG0000570	1	7	1	6	10	5	4	1	0	35
OG0000571	3	14	0	3	8	4	1	0	2	35
OG0000572	2	10	2	6	7	5	0	0	3	35
OG0000573	0	10	2	7	2	5	5	2	2	35
OG0000574	0	35	0	0	0	0	0	0	0	35
OG0000575	0	1	0	26	3	3	1	0	1	35
OG0000576	0	2	0	0	2	5	3	11	12	35
OG0000577	0	0	0	1	9	25	0	0	0	35
OG0000578	9	1	0	3	10	8	0	0	3	34
OG0000579	2	2	1	2	4	1	17	0	5	34
OG0000580	2	7	0	2	2	1	10	6	4	34
OG0000581	3	4	3	3	7	6	1	2	5	34
OG0000582	1	2	1	4	9	2	7	6	2	34
OG0000583	2	4	1	2	4	3	15	2	1	34
OG0000584	3	5	2	5	6	5	4	2	2	34
OG0000585	7	0	0	2	7	0	16	2	0	34
OG0000586	2	5	1	2	11	8	0	0	5	34
OG0000587	6	13	0	2	6	1	3	0	3	34
OG0000588	1	4	1	3	10	4	9	0	2	34
OG0000589	2	0	2	4	7	1	15	2	1	34
OG0000590	1	1	0	10	1	14	1	2	4	34
OG0000591	2	2	1	3	5	1	17	1	2	34
OG0000592	0	31	0	0	0	1	2	0	0	34
OG0000593	0	31	0	3	0	0	0	0	0	34
OG0000594	0	34	0	0	0	0	0	0	0	34
OG0000595	0	13	0	18	1	1	0	0	1	34
OG0000596	0	1	0	21	1	0	4	1	6	34
OG0000597	0	0	2	19	2	2	1	0	8	34
OG0000598	0	0	0	0	0	0	0	17	17	34
OG0000599	3	9	0	3	7	0	10	0	1	33
OG0000600	3	4	0	3	3	1	3	9	7	33
OG0000601	3	7	2	6	8	4	1	1	1	33
OG0000602	2	10	4	2	3	3	4	2	3	33
OG0000603	1	15	1	1	2	2	5	2	4	33
OG0000604	4	10	5	2	2	2	4	2	2	33
OG0000605	3	2	2	1	4	10	7	0	4	33
OG0000606	2	0	0	7	8	8	3	2	3	33
OG0000607	1	6	1	2	5	1	6	1	10	33
OG0000608	4	5	2	4	4	4	3	3	4	33
OG0000609	5	2	0	3	7	4	1	6	5	33
OG0000610	5	5	1	1	2	3	12	0	4	33
OG0000611	1	11	2	5	5	5	2	1	1	33
OG0000612	2	11	1	1	2	2	1	9	4	33
OG0000613	1	7	0	5	8	12	0	0	0	33
OG0000614	4	2	0	2	0	0	12	8	5	33
OG0000615	1	1	5	8	1	2	14	0	1	33
OG0000616	3	5	0	4	4	10	3	0	4	33
OG0000617	3	7	0	2	2	4	10	2	3	33
OG0000618	1	6	0	2	10	4	10	0	0	33
OG0000619	0	13	8	0	3	8	1	0	0	33
OG0000620	0	4	0	3	16	6	1	0	3	33
OG0000621	0	12	1	6	7	4	1	1	1	33
OG0000622	0	4	1	5	11	5	6	1	0	33
OG0000623	0	3	0	12	2	3	9	0	4	33
OG0000624	0	0	0	0	0	0	33	0	0	33
OG0000625	32	0	0	0	0	0	0	0	0	32
OG0000626	2	4	4	5	4	2	3	3	5	32
OG0000627	21	1	1	0	2	6	1	0	0	32
OG0000628	4	3	2	2	4	4	3	4	6	32
OG0000629	5	4	1	2	4	4	2	7	3	32
OG0000630	3	3	0	2	15	7	0	1	1	32
OG0000631	4	4	3	2	5	4	3	3	4	32
OG0000632	4	3	4	3	7	3	2	3	3	32
OG0000633	5	3	0	3	4	7	9	1	0	32
OG0000634	2	5	0	3	2	8	9	2	1	32
OG0000635	7	5	1	0	0	19	0	0	0	32
OG0000636	1	3	0	0	21	7	0	0	0	32
OG0000637	2	2	0	0	9	5	5	5	4	32
OG0000638	7	11	0	4	9	1	0	0	0	32
OG0000639	2	14	0	3	3	2	6	0	2	32
OG0000640	1	8	1	3	1	7	5	2	4	32
OG0000641	2	1	1	2	5	5	10	0	6	32
OG0000642	1	9	1	6	4	11	0	0	0	32
OG0000643	1	0	4	7	3	5	9	2	1	32
OG0000644	1	5	2	1	6	1	13	1	2	32
OG0000645	0	5	1	4	13	4	3	0	2	32
OG0000646	0	32	0	0	0	0	0	0	0	32
OG0000647	0	6	0	4	8	10	0	0	4	32
OG0000648	0	8	3	6	6	5	2	0	2	32
OG0000649	0	2	0	3	3	1	9	12	2	32
OG0000650	0	5	0	6	8	10	1	1	1	32
OG0000651	0	0	31	0	0	0	0	0	1	32
OG0000652	0	0	0	31	0	1	0	0	0	32
OG0000653	0	0	0	0	0	0	30	1	1	32
OG0000654	5	1	0	3	4	9	5	0	4	31
OG0000655	16	1	0	1	7	1	1	1	3	31
OG0000656	8	1	0	2	3	0	14	2	1	31
OG0000657	5	3	1	2	2	5	2	5	6	31
OG0000658	3	4	1	3	4	4	4	3	5	31
OG0000659	3	9	0	2	8	7	0	0	2	31
OG0000660	4	3	0	4	3	1	10	1	5	31
OG0000661	4	4	1	2	4	7	3	3	3	31
OG0000662	4	6	0	0	10	7	1	1	2	31
OG0000663	2	2	0	4	7	4	2	3	7	31
OG0000664	6	3	0	1	10	5	5	1	0	31
OG0000665	3	5	3	1	4	4	1	5	5	31
OG0000666	6	5	0	2	2	6	4	2	4	31
OG0000667	1	6	1	3	11	7	0	1	1	31
OG0000668	2	7	0	3	1	1	2	1	14	31
OG0000669	2	5	0	4	4	1	14	1	0	31
OG0000670	3	1	1	2	4	5	5	6	4	31
OG0000671	3	3	8	3	3	3	3	2	3	31
OG0000672	1	0	0	0	0	29	0	0	1	31
OG0000673	1	6	2	5	8	3	5	1	0	31
OG0000674	3	0	0	8	2	8	8	0	2	31
OG0000675	2	0	1	10	4	3	3	0	8	31
OG0000676	3	4	1	2	6	3	9	0	3	31
OG0000677	2	2	1	4	7	0	9	3	3	31
OG0000678	2	2	0	4	5	3	14	0	1	31
OG0000679	1	3	0	3	6	14	2	0	2	31
OG0000680	0	17	0	1	11	1	0	0	1	31
OG0000681	0	15	0	3	3	6	0	2	2	31
OG0000682	0	3	0	1	5	3	17	0	2	31
OG0000683	0	7	1	1	8	4	5	0	5	31
OG0000684	0	4	0	1	3	16	5	1	1	31
OG0000685	0	1	1	7	3	1	11	0	7	31
OG0000686	0	0	5	16	1	3	2	1	3	31
OG0000687	0	0	0	0	0	0	0	9	22	31
OG0000688	0	0	0	0	0	0	0	0	31	31
OG0000689	8	6	0	0	5	3	7	0	1	30
OG0000690	1	6	4	2	4	4	2	3	4	30
OG0000691	3	6	1	2	9	4	4	0	1	30
OG0000692	4	2	4	3	5	2	3	4	3	30
OG0000693	2	3	12	2	2	2	2	2	3	30
OG0000694	3	3	1	2	11	6	2	1	1	30
OG0000695	1	0	1	3	2	7	7	0	9	30
OG0000696	6	7	1	2	7	3	0	1	3	30
OG0000697	4	5	3	2	4	4	2	3	3	30
OG0000698	5	3	0	1	6	10	2	1	2	30
OG0000699	3	3	4	5	3	3	3	3	3	30
OG0000700	2	2	1	5	5	2	9	1	3	30
OG0000701	2	11	2	3	2	2	4	2	2	30
OG0000702	1	3	11	2	2	4	4	1	2	30
OG0000703	2	2	3	4	7	4	6	1	1	30
OG0000704	2	6	1	2	10	3	3	1	2	30
OG0000705	1	10	0	4	5	5	3	0	2	30
OG0000706	2	3	1	4	10	5	5	0	0	30
OG0000707	0	30	0	0	0	0	0	0	0	30
OG0000708	0	4	1	3	9	5	1	3	4	30
OG0000709	0	12	0	5	7	0	0	3	3	30
OG0000710	0	2	0	9	6	10	0	1	2	30
OG0000711	0	3	1	4	6	2	11	1	2	30
OG0000712	0	7	0	1	2	1	1	11	7	30
OG0000713	0	0	0	0	0	0	30	0	0	30
OG0000714	17	7	1	2	2	0	0	0	0	29
OG0000715	3	4	0	7	6	2	2	0	5	29
OG0000716	2	5	0	0	3	16	3	0	0	29
OG0000717	6	7	3	1	3	4	2	1	2	29
OG0000718	3	4	3	2	3	4	3	2	5	29
OG0000719	3	5	5	0	3	1	3	3	6	29
OG0000720	3	8	4	2	4	2	3	1	2	29
OG0000721	2	3	3	2	3	5	3	5	3	29
OG0000722	4	2	0	4	10	4	0	1	4	29
OG0000723	1	5	0	3	6	5	1	3	5	29
OG0000724	4	12	0	2	4	1	0	0	6	29
OG0000725	4	1	5	3	2	2	8	0	4	29
OG0000726	3	1	0	9	7	2	0	2	5	29
OG0000727	1	9	1	9	3	0	6	0	0	29
OG0000728	1	0	11	16	0	0	1	0	0	29
OG0000729	2	0	1	1	25	0	0	0	0	29
OG0000730	2	5	0	4	9	7	0	0	2	29
OG0000731	2	6	1	4	4	3	7	1	1	29
OG0000732	2	4	0	2	5	14	1	1	0	29
OG0000733	4	3	0	1	2	2	1	9	7	29
OG0000734	2	4	3	3	3	3	4	4	3	29
OG0000735	5	4	1	2	4	2	10	1	0	29
OG0000736	1	0	2	1	10	2	9	3	1	29
OG0000737	2	1	1	1	7	1	15	1	0	29
OG0000738	1	4	1	5	7	3	8	0	0	29
OG0000739	4	2	0	3	7	5	5	0	3	29
OG0000740	1	6	0	4	5	9	1	3	0	29
OG0000741	0	24	1	1	1	0	0	0	2	29
OG0000742	0	12	2	9	1	0	1	0	4	29
OG0000743	0	29	0	0	0	0	0	0	0	29
OG0000744	0	3	0	5	2	6	3	0	10	29
OG0000745	0	4	0	3	3	2	12	1	4	29
OG0000746	0	3	1	0	9	1	15	0	0	29
OG0000747	0	28	0	0	1	0	0	0	0	29
OG0000748	0	28	0	0	1	0	0	0	0	29
OG0000749	7	2	3	2	4	2	7	0	1	28
OG0000750	13	6	0	0	2	0	5	1	1	28
OG0000751	3	5	2	2	6	1	5	1	3	28
OG0000752	1	0	26	0	0	0	1	0	0	28
OG0000753	4	3	3	2	2	4	2	5	3	28
OG0000754	3	5	4	2	3	4	3	2	2	28
OG0000755	4	3	1	3	3	4	3	3	4	28
OG0000756	3	5	0	2	15	3	0	0	0	28
OG0000757	3	9	0	3	4	2	6	0	1	28
OG0000758	2	1	0	7	8	2	4	1	3	28
OG0000759	2	4	2	3	5	4	3	2	3	28
OG0000760	1	2	0	1	2	3	15	2	2	28
OG0000761	2	0	0	3	5	6	8	1	3	28
OG0000762	1	7	0	1	13	2	0	0	4	28
OG0000763	7	1	0	0	2	4	3	5	6	28
OG0000764	2	8	1	2	5	4	2	1	3	28
OG0000765	1	6	0	3	8	2	7	1	0	28
OG0000766	2	4	2	2	5	3	7	0	3	28
OG0000767	2	4	1	3	1	12	3	1	1	28
OG0000768	3	8	3	3	3	4	2	1	1	28
OG0000769	2	1	0	0	10	2	2	3	8	28
OG0000770	2	2	0	2	0	2	11	6	3	28
OG0000771	3	8	1	1	4	0	7	0	4	28
OG0000772	1	5	0	1	7	4	9	0	1	28
OG0000773	1	5	1	2	11	8	0	0	0	28
OG0000774	1	1	0	2	7	2	10	1	4	28
OG0000775	1	5	0	7	2	0	12	0	1	28
OG0000776	0	4	0	6	1	14	0	0	3	28
OG0000777	0	28	0	0	0	0	0	0	0	28
OG0000778	0	13	0	0	6	0	9	0	0	28
OG0000779	0	8	0	9	3	3	4	0	1	28
OG0000780	0	21	1	3	1	0	1	1	0	28
OG0000781	0	28	0	0	0	0	0	0	0	28
OG0000782	0	9	0	1	17	0	1	0	0	28
OG0000783	0	1	0	3	3	5	4	2	10	28
OG0000784	0	3	0	14	0	5	0	2	4	28
OG0000785	0	2	1	8	2	4	6	0	5	28
OG0000786	0	6	1	3	7	5	2	0	4	28
OG0000787	0	28	0	0	0	0	0	0	0	28
OG0000788	0	28	0	0	0	0	0	0	0	28
OG0000789	0	1	3	3	7	10	1	0	3	28
OG0000790	0	1	8	14	0	0	0	0	5	28
OG0000791	1	2	1	1	3	12	3	1	3	27
OG0000792	27	0	0	0	0	0	0	0	0	27
OG0000793	14	2	0	0	0	1	1	3	6	27
OG0000794	4	5	0	1	9	2	4	2	0	27
OG0000795	4	3	1	3	3	3	4	3	3	27
OG0000796	2	1	1	3	5	2	2	5	6	27
OG0000797	3	3	1	3	4	5	2	3	3	27
OG0000798	4	3	3	1	3	3	3	3	4	27
OG0000799	6	2	0	0	7	7	5	0	0	27
OG0000800	3	3	0	2	3	14	0	2	0	27
OG0000801	1	1	5	3	4	4	1	4	4	27
OG0000802	5	5	2	3	3	2	2	2	3	27
OG0000803	3	3	1	5	3	3	3	3	3	27
OG0000804	6	0	0	1	4	15	1	0	0	27
OG0000805	3	5	2	2	3	3	3	3	3	27
OG0000806	2	4	0	4	8	1	6	0	2	27
OG0000807	3	7	1	1	2	3	5	3	2	27
OG0000808	1	8	1	1	1	1	1	10	3	27
OG0000809	2	6	1	5	4	7	0	0	2	27
OG0000810	4	2	2	2	3	3	3	4	4	27
OG0000811	2	3	0	2	3	2	8	2	5	27
OG0000812	1	15	4	1	2	1	1	1	1	27
OG0000813	1	2	0	0	9	6	5	0	4	27
OG0000814	1	1	3	2	1	1	6	7	5	27
OG0000815	3	5	3	2	4	4	2	2	2	27
OG0000816	1	5	0	2	11	4	1	1	2	27
OG0000817	1	7	1	4	5	5	0	1	3	27
OG0000818	2	2	0	1	21	0	0	0	1	27
OG0000819	2	3	1	1	3	2	13	0	2	27
OG0000820	25	0	0	0	0	0	0	1	1	27
OG0000821	0	9	1	2	2	12	0	1	0	27
OG0000822	0	6	0	3	9	7	2	0	0	27
OG0000823	0	1	0	8	3	3	6	0	6	27
OG0000824	0	4	0	1	6	5	5	3	3	27
OG0000825	0	2	1	3	3	9	8	0	1	27
OG0000826	0	1	11	3	1	5	1	1	4	27
OG0000827	0	4	0	2	7	0	12	0	2	27
OG0000828	0	0	1	5	4	4	11	0	2	27
OG0000829	0	0	0	1	1	0	25	0	0	27
OG0000830	0	0	0	0	25	2	0	0	0	27
OG0000831	0	0	0	0	27	0	0	0	0	27
OG0000832	0	0	0	0	0	27	0	0	0	27
OG0000833	7	5	0	0	3	5	2	2	2	26
OG0000834	3	2	2	0	4	3	6	5	1	26
OG0000835	26	0	0	0	0	0	0	0	0	26
OG0000836	7	5	0	5	5	1	0	0	3	26
OG0000837	8	2	0	0	4	6	6	0	0	26
OG0000838	5	4	3	2	2	3	2	3	2	26
OG0000839	6	4	1	1	4	4	2	2	2	26
OG0000840	2	0	2	5	6	1	8	0	2	26
OG0000841	3	3	1	2	3	3	3	4	4	26
OG0000842	6	2	1	3	3	3	2	3	3	26
OG0000843	4	1	0	6	4	6	5	0	0	26
OG0000844	10	4	3	1	1	3	1	1	2	26
OG0000845	3	3	13	1	1	1	1	1	2	26
OG0000846	2	5	0	1	3	8	3	1	3	26
OG0000847	2	2	2	1	2	13	2	1	1	26
OG0000848	2	3	8	2	3	2	2	1	3	26
OG0000849	1	6	3	2	5	3	2	1	3	26
OG0000850	4	3	3	5	4	1	6	0	0	26
OG0000851	5	2	0	1	6	3	5	1	3	26
OG0000852	3	2	5	3	2	2	3	3	3	26
OG0000853	1	6	0	1	11	1	0	0	6	26
OG0000854	2	5	2	4	2	6	0	1	4	26
OG0000855	3	2	0	3	2	1	15	0	0	26
OG0000856	1	9	4	4	5	0	2	1	0	26
OG0000857	3	3	1	2	3	4	7	0	3	26
OG0000858	1	2	0	5	9	1	4	0	4	26
OG0000859	1	4	1	2	4	2	9	1	2	26
OG0000860	2	2	2	3	4	3	5	3	2	26
OG0000861	4	2	0	2	6	4	6	0	2	26
OG0000862	1	1	0	1	3	1	9	9	1	26
OG0000863	1	10	1	1	6	2	3	1	1	26
OG0000864	2	5	0	2	7	5	3	0	2	26
OG0000865	1	7	1	3	7	5	0	0	2	26
OG0000866	1	2	0	3	7	6	5	0	2	26
OG0000867	2	4	3	5	6	1	0	4	1	26
OG0000868	2	0	0	7	1	2	10	0	4	26
OG0000869	0	25	0	0	1	0	0	0	0	26
OG0000870	0	2	0	3	7	12	0	0	2	26
OG0000871	0	3	4	0	5	4	4	0	6	26
OG0000872	0	3	0	4	4	11	4	0	0	26
OG0000873	0	4	2	2	2	4	3	3	6	26
OG0000874	0	6	3	3	7	2	1	0	4	26
OG0000875	0	5	0	4	13	3	0	0	1	26
OG0000876	0	10	0	1	7	2	1	0	5	26
OG0000877	0	6	0	7	1	2	2	1	7	26
OG0000878	0	8	0	1	6	6	3	2	0	26
OG0000879	0	5	0	2	6	3	6	1	3	26
OG0000880	0	3	2	9	1	3	6	1	1	26
OG0000881	0	0	0	1	3	15	7	0	0	26
OG0000882	0	0	0	5	15	6	0	0	0	26
OG0000883	3	5	0	3	9	3	0	0	2	25
OG0000884	3	12	0	3	5	1	0	0	1	25
OG0000885	1	4	1	0	4	6	2	0	7	25
OG0000886	2	1	0	4	10	1	0	2	5	25
OG0000887	3	3	0	3	3	2	7	0	4	25
OG0000888	2	1	0	2	0	1	19	0	0	25
OG0000889	4	2	2	1	3	2	2	5	4	25
OG0000890	2	4	1	2	5	8	2	0	1	25
OG0000891	1	6	0	2	7	4	1	0	4	25
OG0000892	1	1	0	4	2	6	6	4	1	25
OG0000893	4	4	2	1	4	3	2	3	2	25
OG0000894	2	3	2	3	3	3	5	2	2	25
OG0000895	4	2	0	2	6	1	10	0	0	25
OG0000896	3	3	2	4	3	3	3	1	3	25
OG0000897	1	2	7	3	2	6	3	0	1	25
OG0000898	1	0	0	3	2	18	1	0	0	25
OG0000899	4	0	0	4	9	1	3	1	3	25
OG0000900	3	4	2	0	4	5	2	3	2	25
OG0000901	2	6	0	0	1	6	8	0	2	25
OG0000902	1	12	1	3	3	2	1	1	1	25
OG0000903	3	3	1	2	2	3	5	3	3	25
OG0000904	4	3	0	2	7	9	0	0	0	25
OG0000905	1	1	0	4	1	11	4	2	1	25
OG0000906	2	2	0	4	8	2	0	0	7	25
OG0000907	5	2	3	3	3	4	1	1	3	25
OG0000908	1	16	0	0	2	6	0	0	0	25
OG0000909	3	3	4	1	3	3	2	3	3	25
OG0000910	1	7	0	1	4	4	8	0	0	25
OG0000911	2	6	0	3	6	8	0	0	0	25
OG0000912	2	2	2	0	8	8	1	0	2	25
OG0000913	1	1	10	0	5	1	3	0	4	25
OG0000914	2	3	0	2	12	4	2	0	0	25
OG0000915	2	5	0	2	3	13	0	0	0	25
OG0000916	1	10	0	1	4	5	1	1	2	25
OG0000917	2	4	0	3	6	4	1	3	2	25
OG0000918	1	9	4	3	3	3	2	0	0	25
OG0000919	0	24	0	1	0	0	0	0	0	25
OG0000920	0	24	0	0	0	0	0	0	1	25
OG0000921	0	6	2	3	7	2	0	0	5	25
OG0000922	0	12	1	2	4	2	1	0	3	25
OG0000923	0	10	0	2	10	0	2	0	1	25
OG0000924	0	4	0	1	6	4	5	3	2	25
OG0000925	0	24	0	0	0	1	0	0	0	25
OG0000926	0	2	1	1	8	8	5	0	0	25
OG0000927	0	4	0	1	8	10	2	0	0	25
OG0000928	0	10	1	3	5	5	0	0	1	25
OG0000929	0	6	0	7	2	3	5	1	1	25
OG0000930	0	5	2	3	8	7	0	0	0	25
OG0000931	0	2	0	1	2	0	18	2	0	25
OG0000932	0	4	1	4	6	4	4	2	0	25
OG0000933	0	4	11	4	2	0	0	0	4	25
OG0000934	0	1	0	5	1	11	0	0	7	25
OG0000935	0	3	4	9	3	0	2	1	3	25
OG0000936	0	2	0	1	3	6	3	5	5	25
OG0000937	0	4	1	4	8	3	2	0	3	25
OG0000938	0	0	22	2	0	0	0	0	1	25
OG0000939	0	0	3	7	0	9	0	1	5	25
OG0000940	0	0	1	17	1	1	1	0	4	25
OG0000941	0	0	0	4	3	1	14	3	0	25
OG0000942	0	0	0	0	2	23	0	0	0	25
OG0000943	0	0	0	0	0	0	0	23	2	25
OG0000944	2	0	2	5	3	0	10	1	1	24
OG0000945	16	2	0	0	5	0	0	0	1	24
OG0000946	4	3	2	2	4	4	2	2	1	24
OG0000947	20	0	0	0	0	0	0	0	4	24
OG0000948	4	3	1	2	5	4	2	2	1	24
OG0000949	4	3	0	2	5	4	2	2	2	24
OG0000950	3	0	0	2	2	2	10	4	1	24
OG0000951	2	5	3	2	4	2	2	2	2	24
OG0000952	3	3	1	3	2	3	2	4	3	24
OG0000953	2	2	2	4	3	2	3	2	4	24
OG0000954	3	8	0	3	2	5	0	2	1	24
OG0000955	3	1	0	3	4	1	9	1	2	24
OG0000956	3	2	3	2	2	3	2	3	4	24
OG0000957	1	3	6	3	2	2	4	2	1	24
OG0000958	2	0	0	0	0	0	0	13	9	24
OG0000959	2	3	1	3	3	3	3	3	3	24
OG0000960	17	0	0	0	0	1	1	3	2	24
OG0000961	6	3	1	2	2	3	6	0	1	24
OG0000962	5	3	0	4	2	2	1	4	3	24
OG0000963	4	7	0	2	5	5	0	1	0	24
OG0000964	2	1	3	2	2	2	6	2	4	24
OG0000965	3	3	2	2	3	3	3	2	3	24
OG0000966	1	12	3	2	1	1	2	1	1	24
OG0000967	3	3	1	2	3	3	3	3	3	24
OG0000968	1	0	0	20	1	1	0	1	0	24
OG0000969	1	1	0	3	9	0	4	1	5	24
OG0000970	2	3	1	2	3	4	2	4	3	24
OG0000971	2	4	2	1	4	1	10	0	0	24
OG0000972	1	6	0	0	6	0	1	3	7	24
OG0000973	1	11	0	3	6	1	2	0	0	24
OG0000974	2	2	1	7	1	0	7	0	4	24
OG0000975	3	5	0	4	4	8	0	0	0	24
OG0000976	1	3	4	4	4	3	5	0	0	24
OG0000977	1	0	1	1	3	18	0	0	0	24
OG0000978	1	0	1	2	1	13	1	2	3	24
OG0000979	0	24	0	0	0	0	0	0	0	24
OG0000980	0	8	1	1	5	3	5	0	1	24
OG0000981	0	24	0	0	0	0	0	0	0	24
OG0000982	0	12	0	9	1	0	1	0	1	24
OG0000983	0	1	0	7	0	14	0	0	2	24
OG0000984	0	2	0	2	1	12	7	0	0	24
OG0000985	0	22	0	0	2	0	0	0	0	24
OG0000986	0	3	0	17	1	1	0	0	2	24
OG0000987	0	6	0	4	3	4	5	1	1	24
OG0000988	0	1	0	11	4	7	1	0	0	24
OG0000989	0	3	0	15	4	1	1	0	0	24
OG0000990	0	3	5	3	1	3	7	0	2	24
OG0000991	0	1	0	0	0	23	0	0	0	24
OG0000992	0	3	0	1	4	9	1	0	6	24
OG0000993	0	24	0	0	0	0	0	0	0	24
OG0000994	0	22	0	2	0	0	0	0	0	24
OG0000995	0	10	1	0	4	5	2	1	1	24
OG0000996	0	0	24	0	0	0	0	0	0	24
OG0000997	0	0	15	0	5	2	2	0	0	24
OG0000998	0	0	1	13	0	1	3	0	6	24
OG0000999	0	0	3	9	0	6	0	0	6	24
OG0001000	0	0	0	0	0	0	0	16	8	24
OG0001001	0	0	0	0	0	0	0	20	4	24
OG0001002	21	0	0	2	0	0	0	0	0	23
OG0001003	23	0	0	0	0	0	0	0	0	23
OG0001004	4	13	0	1	2	3	0	0	0	23
OG0001005	10	4	2	1	2	1	1	1	1	23
OG0001006	11	1	1	1	4	1	2	1	1	23
OG0001007	7	2	1	2	2	3	2	0	4	23
OG0001008	1	2	1	1	1	1	1	11	4	23
OG0001009	5	2	1	1	1	7	1	2	3	23
OG0001010	2	3	2	1	3	3	5	2	2	23
OG0001011	2	3	2	3	3	2	3	2	3	23
OG0001012	2	5	4	3	2	2	1	2	2	23
OG0001013	2	3	5	3	2	2	2	2	2	23
OG0001014	5	0	2	7	4	0	4	0	1	23
OG0001015	3	6	0	2	2	2	8	0	0	23
OG0001016	5	3	1	1	5	4	1	1	2	23
OG0001017	2	4	2	2	2	3	2	3	3	23
OG0001018	3	3	1	2	2	3	3	3	3	23
OG0001019	2	2	2	4	2	3	3	2	3	23
OG0001020	3	1	2	3	3	1	2	4	4	23
OG0001021	2	2	1	10	4	0	3	1	0	23
OG0001022	5	1	5	3	3	2	1	1	2	23
OG0001023	3	0	0	1	4	3	0	8	4	23
OG0001024	1	5	3	1	2	2	1	2	6	23
OG0001025	3	2	1	3	5	2	2	3	2	23
OG0001026	2	3	1	3	3	3	2	3	3	23
OG0001027	4	6	0	3	4	3	2	0	1	23
OG0001028	4	0	0	2	9	0	0	0	8	23
OG0001029	3	1	1	0	4	1	3	1	9	23
OG0001030	6	2	1	1	2	2	5	2	2	23
OG0001031	1	0	0	1	0	5	10	0	6	23
OG0001032	2	4	2	2	3	2	2	3	3	23
OG0001033	3	3	0	2	9	4	0	0	2	23
OG0001034	7	1	0	6	8	1	0	0	0	23
OG0001035	2	4	2	3	3	3	5	0	1	23
OG0001036	2	3	2	3	3	2	3	2	3	23
OG0001037	2	5	0	3	5	2	3	0	3	23
OG0001038	1	4	0	1	5	6	4	0	2	23
OG0001039	1	0	7	9	0	2	0	0	4	23
OG0001040	2	6	5	1	2	2	1	1	3	23
OG0001041	2	6	3	3	3	4	2	0	0	23
OG0001042	2	2	4	3	3	2	2	2	3	23
OG0001043	1	8	0	1	7	2	0	2	2	23
OG0001044	2	2	0	2	9	5	0	0	3	23
OG0001045	1	3	2	1	8	4	0	0	4	23
OG0001046	1	1	6	1	2	0	9	1	2	23
OG0001047	1	3	0	0	3	5	5	1	5	23
OG0001048	1	2	0	3	7	3	7	0	0	23
OG0001049	1	9	0	3	7	1	0	0	2	23
OG0001050	1	2	0	6	2	0	6	0	6	23
OG0001051	1	0	0	2	3	4	12	0	1	23
OG0001052	1	5	0	5	8	2	0	0	2	23
OG0001053	1	2	0	4	3	0	4	0	9	23
OG0001054	0	22	0	0	1	0	0	0	0	23
OG0001055	0	3	0	1	4	13	1	0	1	23
OG0001056	0	4	0	1	6	9	2	0	1	23
OG0001057	0	12	5	5	1	0	0	0	0	23
OG0001058	0	7	1	3	1	10	0	0	1	23
OG0001059	0	4	1	0	6	3	8	1	0	23
OG0001060	0	11	0	1	2	1	3	1	4	23
OG0001061	0	3	2	9	2	3	4	0	0	23
OG0001062	0	6	0	4	8	3	2	0	0	23
OG0001063	0	8	0	2	7	4	0	0	2	23
OG0001064	0	23	0	0	0	0	0	0	0	23
OG0001065	0	2	0	2	5	10	1	2	1	23
OG0001066	0	14	0	1	2	4	2	0	0	23
OG0001067	0	6	0	2	3	5	5	0	2	23
OG0001068	0	6	2	1	3	4	5	0	2	23
OG0001069	0	1	8	8	0	2	0	1	3	23
OG0001070	0	2	1	15	0	3	0	0	2	23
OG0001071	0	9	0	4	6	3	1	0	0	23
OG0001072	0	0	19	3	0	0	0	0	1	23
OG0001073	0	0	1	4	8	1	4	0	5	23
OG0001074	0	0	1	2	2	3	6	9	0	23
OG0001075	0	0	0	7	8	1	5	0	2	23
OG0001076	0	0	0	1	5	5	9	1	2	23
OG0001077	0	0	0	2	1	19	0	0	1	23
OG0001078	0	0	0	0	1	0	22	0	0	23
OG0001079	0	0	0	0	0	23	0	0	0	23
OG0001080	0	0	0	0	0	0	0	1	22	23
OG0001081	0	0	0	0	0	0	0	0	23	23
OG0001082	6	3	1	2	1	1	2	2	4	22
OG0001083	2	2	7	2	2	2	2	2	1	22
OG0001084	4	1	0	5	3	1	3	1	4	22
OG0001085	4	3	2	3	2	2	2	2	2	22
OG0001086	5	5	0	2	4	1	5	0	0	22
OG0001087	3	3	1	3	2	3	2	2	3	22
OG0001088	3	4	1	1	1	5	7	0	0	22
OG0001089	4	4	0	2	3	4	2	2	1	22
OG0001090	2	5	1	0	3	4	2	2	3	22
OG0001091	4	1	0	1	5	1	10	0	0	22
OG0001092	5	1	4	1	1	1	2	4	3	22
OG0001093	3	1	1	5	2	4	2	1	3	22
OG0001094	5	3	0	1	4	2	3	1	3	22
OG0001095	1	1	1	3	6	0	7	1	2	22
OG0001096	1	6	0	2	4	4	2	1	2	22
OG0001097	2	1	1	4	1	2	11	0	0	22
OG0001098	1	3	3	1	1	3	2	3	5	22
OG0001099	3	2	1	2	4	2	4	2	2	22
OG0001100	2	3	1	4	3	3	3	1	2	22
OG0001101	2	3	1	3	2	4	3	2	2	22
OG0001102	2	5	1	3	2	3	2	2	2	22
OG0001103	2	2	2	3	2	3	4	2	2	22
OG0001104	5	5	0	4	0	5	2	0	1	22
OG0001105	1	4	0	1	5	10	0	1	0	22
OG0001106	2	4	1	0	2	1	2	5	5	22
OG0001107	2	5	0	1	3	2	4	1	4	22
OG0001108	2	2	0	2	5	2	2	3	4	22
OG0001109	2	2	2	4	2	2	3	2	3	22
OG0001110	4	4	0	2	3	9	0	0	0	22
OG0001111	1	2	0	3	4	4	3	1	4	22
OG0001112	2	4	0	3	4	8	0	0	1	22
OG0001113	1	9	0	1	7	0	0	2	2	22
OG0001114	1	2	1	2	8	3	5	0	0	22
OG0001115	2	1	0	2	3	10	4	0	0	22
OG0001116	1	1	0	2	2	0	16	0	0	22
OG0001117	1	4	0	5	2	6	0	1	3	22
OG0001118	0	3	1	4	8	2	2	0	2	22
OG0001119	0	22	0	0	0	0	0	0	0	22
OG0001120	0	5	1	1	6	3	2	1	3	22
OG0001121	0	1	1	6	1	10	0	1	2	22
OG0001122	0	3	1	1	1	5	11	0	0	22
OG0001123	0	8	0	0	3	4	0	1	6	22
OG0001124	0	2	1	1	7	5	5	1	0	22
OG0001125	0	5	0	5	3	3	5	0	1	22
OG0001126	0	1	4	9	4	3	0	0	1	22
OG0001127	0	2	0	5	2	2	9	1	1	22
OG0001128	0	0	1	1	1	18	1	0	0	22
OG0001129	0	0	0	3	1	14	3	0	1	22
OG0001130	0	0	0	0	21	1	0	0	0	22
OG0001131	0	0	0	0	0	0	0	0	22	22
OG0001132	21	0	0	0	0	0	0	0	0	21
OG0001133	21	0	0	0	0	0	0	0	0	21
OG0001134	6	6	0	0	4	1	1	1	2	21
OG0001135	4	0	0	3	2	0	9	1	2	21
OG0001136	11	2	0	6	0	1	1	0	0	21
OG0001137	1	2	3	3	3	3	2	1	3	21
OG0001138	1	13	1	1	1	1	1	1	1	21
OG0001139	2	2	4	3	2	2	2	2	2	21
OG0001140	2	7	0	4	4	1	2	0	1	21
OG0001141	3	0	0	1	0	2	14	1	0	21
OG0001142	2	4	0	0	6	4	3	0	2	21
OG0001143	2	2	2	3	2	2	4	2	2	21
OG0001144	4	2	1	3	2	3	2	2	2	21
OG0001145	2	2	2	2	5	2	2	2	2	21
OG0001146	1	0	0	1	2	4	3	3	7	21
OG0001147	2	4	0	3	2	6	0	2	2	21
OG0001148	3	1	0	4	0	9	1	0	3	21
OG0001149	6	2	0	0	7	4	1	0	1	21
OG0001150	3	2	5	1	2	2	2	2	2	21
OG0001151	2	2	0	2	3	3	3	3	3	21
OG0001152	2	2	5	2	2	2	2	2	2	21
OG0001153	1	2	2	2	2	3	4	2	3	21
OG0001154	2	2	4	2	3	2	2	2	2	21
OG0001155	5	2	1	2	2	3	2	2	2	21
OG0001156	2	2	1	1	7	0	4	3	1	21
OG0001157	1	3	0	1	4	8	2	0	2	21
OG0001158	2	2	0	0	0	1	1	4	11	21
OG0001159	1	4	1	2	2	2	1	2	6	21
OG0001160	3	1	4	0	2	2	5	2	2	21
OG0001161	3	5	0	1	6	3	0	2	1	21
OG0001162	3	3	1	2	3	2	1	2	4	21
OG0001163	2	1	0	1	1	2	2	3	9	21
OG0001164	2	3	2	2	2	3	2	2	3	21
OG0001165	1	7	1	3	2	3	2	1	1	21
OG0001166	3	3	1	2	2	2	2	2	4	21
OG0001167	1	2	1	0	13	0	3	0	1	21
OG0001168	1	9	1	2	4	1	1	1	1	21
OG0001169	2	2	5	1	2	2	3	2	2	21
OG0001170	2	3	2	2	2	2	2	3	3	21
OG0001171	2	5	2	2	2	2	1	2	3	21
OG0001172	3	13	0	1	3	0	0	1	0	21
OG0001173	1	1	9	1	3	3	1	1	1	21
OG0001174	1	1	6	4	3	0	4	0	2	21
OG0001175	3	3	2	3	2	2	2	2	2	21
OG0001176	3	3	2	1	3	3	3	0	3	21
OG0001177	3	5	0	1	2	0	10	0	0	21
OG0001178	1	3	3	2	2	1	3	5	1	21
OG0001179	2	5	2	2	2	2	2	2	2	21
OG0001180	1	4	1	1	4	4	0	0	6	21
OG0001181	1	3	0	4	6	3	4	0	0	21
OG0001182	1	2	0	11	7	0	0	0	0	21
OG0001183	2	4	1	2	4	0	6	0	2	21
OG0001184	1	2	0	2	1	2	7	2	4	21
OG0001185	3	0	2	1	2	4	6	0	3	21
OG0001186	1	0	0	7	2	3	0	0	8	21
OG0001187	1	0	0	1	3	12	2	2	0	21
OG0001188	2	2	4	4	2	0	3	2	2	21
OG0001189	1	14	0	1	0	4	0	0	1	21
OG0001190	1	1	0	4	5	2	2	1	5	21
OG0001191	0	3	1	3	1	0	7	3	3	21
OG0001192	0	2	5	3	0	8	0	1	2	21
OG0001193	0	2	1	3	5	6	3	0	1	21
OG0001194	0	21	0	0	0	0	0	0	0	21
OG0001195	0	4	0	0	11	6	0	0	0	21
OG0001196	0	4	0	3	0	6	1	7	0	21
OG0001197	0	12	0	1	4	4	0	0	0	21
OG0001198	0	5	0	3	6	3	4	0	0	21
OG0001199	0	12	1	0	5	0	0	1	2	21
OG0001200	0	3	0	4	5	2	0	4	3	21
OG0001201	0	5	1	2	3	5	2	2	1	21
OG0001202	0	5	0	1	0	14	0	0	1	21
OG0001203	0	1	0	3	1	3	12	0	1	21
OG0001204	0	6	6	5	0	2	0	0	2	21
OG0001205	0	1	0	0	3	12	2	0	3	21
OG0001206	0	0	9	6	1	0	0	1	4	21
OG0001207	0	0	21	0	0	0	0	0	0	21
OG0001208	0	0	21	0	0	0	0	0	0	21
OG0001209	0	0	0	1	0	19	0	1	0	21
OG0001210	0	0	0	0	0	21	0	0	0	21
OG0001211	0	0	0	0	0	0	21	0	0	21
OG0001212	0	0	0	0	0	0	0	0	21	21
OG0001213	3	1	0	1	1	8	3	0	3	20
OG0001214	3	1	3	0	0	0	0	9	4	20
OG0001215	3	0	0	2	1	1	10	1	2	20
OG0001216	5	2	0	2	7	3	0	0	1	20
OG0001217	2	2	2	1	3	3	3	2	2	20
OG0001218	6	1	5	2	1	1	2	1	1	20
OG0001219	2	2	2	1	4	2	3	2	2	20
OG0001220	1	2	2	1	4	2	3	3	2	20
OG0001221	3	1	0	2	3	8	0	2	1	20
OG0001222	5	2	0	4	4	2	1	1	1	20
OG0001223	2	5	3	1	1	1	2	2	3	20
OG0001224	20	0	0	0	0	0	0	0	0	20
OG0001225	1	2	1	1	5	2	1	5	2	20
OG0001226	2	4	1	3	2	4	1	1	2	20
OG0001227	4	1	0	1	1	11	0	1	1	20
OG0001228	2	1	3	1	9	1	1	1	1	20
OG0001229	2	0	0	0	0	0	0	14	4	20
OG0001230	2	2	3	1	2	2	1	3	4	20
OG0001231	2	2	3	2	2	2	2	2	3	20
OG0001232	4	1	1	3	2	1	4	3	1	20
OG0001233	1	5	6	1	2	2	1	1	1	20
OG0001234	2	2	5	1	2	2	2	2	2	20
OG0001235	1	3	0	2	3	4	1	4	2	20
OG0001236	3	3	0	1	1	1	1	3	7	20
OG0001237	1	3	4	2	4	3	1	1	1	20
OG0001238	3	2	1	1	3	3	3	3	1	20
OG0001239	2	2	3	3	2	2	2	2	2	20
OG0001240	2	1	0	1	1	2	11	0	2	20
OG0001241	1	0	0	0	0	0	0	0	19	20
OG0001242	3	1	1	3	2	2	4	2	2	20
OG0001243	2	2	1	1	1	7	3	1	2	20
OG0001244	2	2	3	5	3	2	3	0	0	20
OG0001245	1	2	1	5	4	4	1	1	1	20
OG0001246	1	1	12	1	1	1	1	1	1	20
OG0001247	3	3	1	2	3	3	2	1	2	20
OG0001248	2	2	2	2	3	2	2	2	3	20
OG0001249	2	2	1	1	4	4	2	2	2	20
OG0001250	1	1	12	1	1	1	1	1	1	20
OG0001251	1	0	0	4	6	0	5	0	4	20
OG0001252	3	4	0	1	1	1	0	5	5	20
OG0001253	1	2	0	1	1	2	13	0	0	20
OG0001254	2	2	1	4	2	2	3	2	2	20
OG0001255	2	2	2	2	2	2	3	3	2	20
OG0001256	3	2	3	2	2	3	1	2	2	20
OG0001257	1	4	0	2	5	1	1	3	3	20
OG0001258	3	0	1	2	7	2	2	1	2	20
OG0001259	1	2	2	2	5	2	2	2	2	20
OG0001260	2	2	2	2	2	2	2	2	4	20
OG0001261	2	2	2	3	2	3	2	2	2	20
OG0001262	2	2	1	3	3	2	2	2	3	20
OG0001263	1	2	2	2	4	2	2	3	2	20
OG0001264	3	2	1	3	2	2	3	2	2	20
OG0001265	2	2	3	3	2	2	2	2	2	20
OG0001266	2	2	5	1	2	2	2	1	3	20
OG0001267	1	2	3	3	1	3	2	3	2	20
OG0001268	1	6	0	1	5	1	1	3	2	20
OG0001269	2	2	2	2	2	2	2	2	4	20
OG0001270	2	1	3	1	1	3	2	1	6	20
OG0001271	1	1	1	3	1	0	12	0	1	20
OG0001272	1	5	0	1	5	4	0	1	3	20
OG0001273	2	2	1	2	2	2	1	4	4	20
OG0001274	4	5	4	1	2	1	1	1	1	20
OG0001275	2	3	2	1	2	2	2	3	3	20
OG0001276	1	1	8	1	1	1	4	1	2	20
OG0001277	2	3	0	1	1	3	8	0	2	20
OG0001278	3	0	0	0	4	5	2	0	6	20
OG0001279	2	15	0	2	0	0	0	0	1	20
OG0001280	1	4	0	1	3	1	8	0	2	20
OG0001281	1	5	4	2	1	4	1	1	1	20
OG0001282	2	1	1	1	9	3	1	0	2	20
OG0001283	1	4	0	0	5	8	1	1	0	20
OG0001284	2	0	2	1	1	2	8	0	4	20
OG0001285	1	19	0	0	0	0	0	0	0	20
OG0001286	3	2	2	1	5	2	4	0	1	20
OG0001287	1	1	2	3	5	1	4	2	1	20
OG0001288	2	5	1	0	6	1	1	1	3	20
OG0001289	1	4	0	0	1	7	7	0	0	20
OG0001290	2	2	2	2	2	2	2	3	3	20
OG0001291	1	5	1	1	6	4	2	0	0	20
OG0001292	1	1	0	2	3	3	9	0	1	20
OG0001293	0	3	0	3	5	6	2	0	1	20
OG0001294	0	3	0	2	1	14	0	0	0	20
OG0001295	0	6	2	2	0	9	0	0	1	20
OG0001296	0	13	0	1	4	1	1	0	0	20
OG0001297	0	20	0	0	0	0	0	0	0	20
OG0001298	0	5	0	2	1	10	0	1	1	20
OG0001299	0	1	1	4	6	2	0	0	6	20
OG0001300	0	2	1	2	4	4	3	2	2	20
OG0001301	0	2	0	1	2	8	7	0	0	20
OG0001302	0	2	0	0	2	0	16	0	0	20
OG0001303	0	6	0	1	11	0	0	0	2	20
OG0001304	0	18	0	0	1	1	0	0	0	20
OG0001305	0	3	0	1	3	10	0	1	2	20
OG0001306	0	1	2	9	0	1	0	0	7	20
OG0001307	0	19	0	0	0	0	0	0	1	20
OG0001308	0	2	0	0	4	14	0	0	0	20
OG0001309	0	0	0	3	0	7	1	1	8	20
OG0001310	0	0	0	2	4	2	8	1	3	20
OG0001311	0	0	0	0	19	0	0	0	1	20
OG0001312	0	0	0	0	1	1	17	0	1	20
OG0001313	0	0	0	0	0	20	0	0	0	20
OG0001314	0	0	0	0	0	20	0	0	0	20
OG0001315	0	0	0	0	0	0	0	2	18	20
OG0001316	10	1	1	2	1	1	1	1	1	19
OG0001317	3	1	2	4	5	3	1	0	0	19
OG0001318	4	7	0	0	5	1	0	0	2	19
OG0001319	19	0	0	0	0	0	0	0	0	19
OG0001320	1	3	1	1	5	3	3	0	2	19
OG0001321	2	2	2	2	2	2	2	2	3	19
OG0001322	2	2	3	2	2	2	2	2	2	19
OG0001323	2	5	1	1	3	2	1	2	2	19
OG0001324	2	2	2	2	2	2	3	2	2	19
OG0001325	3	2	1	3	4	2	1	2	1	19
OG0001326	3	1	0	2	0	1	10	0	2	19
OG0001327	2	2	2	2	2	2	2	2	3	19
OG0001328	2	1	2	1	4	3	1	2	3	19
OG0001329	3	2	2	2	2	2	2	2	2	19
OG0001330	2	2	2	2	2	2	2	2	3	19
OG0001331	2	2	1	3	3	2	2	2	2	19
OG0001332	3	5	0	3	0	1	6	0	1	19
OG0001333	1	1	1	1	1	1	1	8	4	19
OG0001334	2	2	3	1	2	2	2	2	3	19
OG0001335	1	0	2	0	1	1	0	4	10	19
OG0001336	8	1	0	0	0	1	6	1	2	19
OG0001337	2	1	1	0	3	1	10	0	1	19
OG0001338	1	2	5	3	1	2	3	1	1	19
OG0001339	2	2	0	2	8	3	1	0	1	19
OG0001340	2	3	2	3	2	2	1	2	2	19
OG0001341	2	3	1	2	3	2	2	2	2	19
OG0001342	2	4	0	1	3	3	2	2	2	19
OG0001343	2	2	3	2	2	2	2	2	2	19
OG0001344	2	2	2	1	3	2	2	2	3	19
OG0001345	2	2	3	2	2	3	1	1	3	19
OG0001346	2	2	2	2	2	2	2	3	2	19
OG0001347	2	2	2	2	2	3	3	1	2	19
OG0001348	1	2	1	3	2	2	4	2	2	19
OG0001349	2	3	2	2	3	4	1	2	0	19
OG0001350	3	1	6	1	2	1	1	2	2	19
OG0001351	2	2	1	0	4	7	3	0	0	19
OG0001352	4	2	1	2	2	2	2	2	2	19
OG0001353	3	2	3	2	2	2	1	2	2	19
OG0001354	1	1	2	2	5	5	1	1	1	19
OG0001355	3	1	0	3	4	3	1	1	3	19
OG0001356	2	2	2	2	3	2	3	2	1	19
OG0001357	1	6	0	4	5	2	0	0	1	19
OG0001358	1	1	0	2	1	1	3	8	2	19
OG0001359	2	2	2	2	2	2	3	2	2	19
OG0001360	2	2	1	2	2	2	2	3	3	19
OG0001361	2	2	1	3	2	2	3	2	2	19
OG0001362	1	7	1	1	2	3	1	1	2	19
OG0001363	2	4	1	2	2	2	3	1	2	19
OG0001364	2	1	2	2	3	2	2	2	3	19
OG0001365	3	2	3	0	3	2	2	2	2	19
OG0001366	2	8	0	0	3	3	2	0	1	19
OG0001367	2	2	2	2	2	2	2	2	3	19
OG0001368	1	3	1	3	4	2	1	2	2	19
OG0001369	2	2	1	3	3	2	2	2	2	19
OG0001370	3	2	1	2	2	2	2	3	2	19
OG0001371	1	2	3	3	2	2	3	2	1	19
OG0001372	2	2	2	3	2	2	2	2	2	19
OG0001373	2	2	2	2	3	2	2	2	2	19
OG0001374	2	4	0	3	2	3	3	1	1	19
OG0001375	1	2	0	2	4	8	0	0	2	19
OG0001376	2	3	0	4	2	2	3	3	0	19
OG0001377	2	2	1	2	2	2	4	2	2	19
OG0001378	2	2	2	2	3	2	2	2	2	19
OG0001379	2	2	2	2	2	2	2	3	2	19
OG0001380	2	2	2	2	4	2	2	1	2	19
OG0001381	2	2	2	2	1	1	3	3	3	19
OG0001382	2	2	2	1	2	2	2	4	2	19
OG0001383	2	2	0	3	3	2	3	0	4	19
OG0001384	1	1	0	1	1	9	2	3	1	19
OG0001385	1	4	1	1	3	6	3	0	0	19
OG0001386	3	1	1	5	1	1	2	2	3	19
OG0001387	2	3	0	2	1	10	0	1	0	19
OG0001388	3	6	3	1	2	0	1	0	3	19
OG0001389	1	3	2	0	0	3	4	1	5	19
OG0001390	1	3	3	2	2	3	2	2	1	19
OG0001391	2	15	0	0	1	1	0	0	0	19
OG0001392	1	2	0	2	7	0	2	2	3	19
OG0001393	1	2	0	0	8	5	0	0	3	19
OG0001394	1	2	0	1	2	2	10	0	1	19
OG0001395	1	1	2	2	5	0	7	1	0	19
OG0001396	2	0	0	1	6	2	5	2	1	19
OG0001397	1	4	0	2	4	5	3	0	0	19
OG0001398	3	6	0	1	8	0	0	0	1	19
OG0001399	1	7	0	3	2	1	0	0	5	19
OG0001400	2	3	2	1	2	3	2	2	2	19
OG0001401	0	2	0	1	2	7	1	0	6	19
OG0001402	0	6	1	2	6	2	0	2	0	19
OG0001403	0	3	2	4	0	8	0	0	2	19
OG0001404	0	1	0	1	0	0	1	8	8	19
OG0001405	0	7	0	0	5	5	1	0	1	19
OG0001406	0	19	0	0	0	0	0	0	0	19
OG0001407	0	9	0	3	3	2	2	0	0	19
OG0001408	0	5	1	2	3	1	2	1	4	19
OG0001409	0	5	0	1	4	0	4	3	2	19
OG0001410	0	4	2	1	1	1	8	0	2	19
OG0001411	0	2	3	8	0	4	0	0	2	19
OG0001412	0	2	0	5	3	1	6	1	1	19
OG0001413	0	6	0	1	0	1	10	0	1	19
OG0001414	0	5	0	2	5	2	3	0	2	19
OG0001415	0	3	0	2	0	6	8	0	0	19
OG0001416	0	3	1	0	1	1	13	0	0	19
OG0001417	0	14	0	0	2	3	0	0	0	19
OG0001418	0	1	2	2	4	0	7	0	3	19
OG0001419	0	1	0	2	1	4	10	0	1	19
OG0001420	0	8	0	1	4	3	3	0	0	19
OG0001421	0	1	3	4	3	2	6	0	0	19
OG0001422	0	3	1	1	6	7	0	0	1	19
OG0001423	0	2	0	1	2	4	7	0	3	19
OG0001424	0	1	0	2	4	0	12	0	0	19
OG0001425	0	1	0	3	11	4	0	0	0	19
OG0001426	0	1	9	3	0	0	4	0	2	19
OG0001427	0	1	1	1	4	3	8	0	1	19
OG0001428	0	0	19	0	0	0	0	0	0	19
OG0001429	0	0	5	2	2	0	3	2	5	19
OG0001430	0	0	4	9	0	2	0	0	4	19
OG0001431	0	0	1	10	2	1	3	1	1	19
OG0001432	0	0	2	11	0	0	1	0	5	19
OG0001433	0	0	5	6	1	3	1	0	3	19
OG0001434	0	0	0	6	7	1	4	0	1	19
OG0001435	0	0	0	6	5	1	0	2	5	19
OG0001436	0	0	0	3	1	6	0	1	8	19
OG0001437	0	0	0	1	4	1	7	6	0	19
OG0001438	2	6	0	2	7	1	0	0	0	18
OG0001439	17	1	0	0	0	0	0	0	0	18
OG0001440	2	1	0	1	8	2	3	0	1	18
OG0001441	11	0	0	3	2	2	0	0	0	18
OG0001442	6	3	0	2	1	1	2	2	1	18
OG0001443	3	4	0	0	2	0	2	4	3	18
OG0001444	1	0	17	0	0	0	0	0	0	18
OG0001445	2	3	2	2	2	2	2	1	2	18
OG0001446	2	1	2	1	4	5	1	1	1	18
OG0001447	1	1	2	1	4	2	5	1	1	18
OG0001448	2	2	2	2	2	2	2	2	2	18
OG0001449	2	1	0	2	3	2	6	1	1	18
OG0001450	3	2	2	3	2	2	1	1	2	18
OG0001451	2	1	0	1	5	5	2	1	1	18
OG0001452	6	2	1	1	1	1	4	1	1	18
OG0001453	3	4	1	0	1	0	8	0	1	18
OG0001454	2	2	2	2	2	2	2	2	2	18
OG0001455	2	2	2	2	2	2	2	2	2	18
OG0001456	3	2	2	2	1	2	2	2	2	18
OG0001457	2	7	0	3	2	1	1	1	1	18
OG0001458	4	1	1	3	4	4	0	0	1	18
OG0001459	2	3	1	1	2	3	2	2	2	18
OG0001460	1	3	2	2	1	4	3	1	1	18
OG0001461	2	3	1	2	2	2	3	1	2	18
OG0001462	2	2	2	2	2	2	2	2	2	18
OG0001463	2	6	1	1	1	1	4	1	1	18
OG0001464	2	3	2	2	2	2	1	2	2	18
OG0001465	2	2	2	2	2	2	2	2	2	18
OG0001466	1	3	3	1	5	1	2	1	1	18
OG0001467	2	2	2	2	2	2	2	2	2	18
OG0001468	1	1	7	0	3	2	1	2	1	18
OG0001469	1	0	15	0	0	0	0	2	0	18
OG0001470	1	9	2	1	2	0	3	0	0	18
OG0001471	2	2	0	1	1	0	2	3	7	18
OG0001472	2	2	3	2	2	2	2	1	2	18
OG0001473	2	4	1	2	2	3	1	1	2	18
OG0001474	2	2	1	3	2	2	2	2	2	18
OG0001475	1	4	1	2	2	2	4	1	1	18
OG0001476	2	2	1	3	2	2	2	2	2	18
OG0001477	2	2	2	3	2	2	2	2	1	18
OG0001478	2	2	4	1	2	2	1	2	2	18
OG0001479	3	2	0	2	2	2	2	3	2	18
OG0001480	2	3	1	2	2	2	2	2	2	18
OG0001481	2	3	1	1	3	2	2	2	2	18
OG0001482	2	2	2	2	2	2	2	2	2	18
OG0001483	2	2	2	2	2	2	2	2	2	18
OG0001484	2	4	0	2	2	2	2	2	2	18
OG0001485	6	2	1	3	1	3	2	0	0	18
OG0001486	4	3	0	1	3	5	0	2	0	18
OG0001487	5	9	2	2	0	0	0	0	0	18
OG0001488	2	2	3	2	2	2	2	1	2	18
OG0001489	1	2	2	2	2	3	2	2	2	18
OG0001490	2	1	1	2	2	2	1	3	4	18
OG0001491	2	0	2	1	2	2	5	0	4	18
OG0001492	2	2	1	3	2	2	2	2	2	18
OG0001493	2	3	2	2	2	2	2	1	2	18
OG0001494	2	2	1	2	2	2	4	2	1	18
OG0001495	1	4	2	2	2	2	1	2	2	18
OG0001496	2	2	2	2	2	2	2	2	2	18
OG0001497	2	2	1	3	2	2	2	2	2	18
OG0001498	2	2	2	2	3	2	3	2	0	18
OG0001499	2	3	1	2	2	2	2	2	2	18
OG0001500	1	4	0	1	2	6	0	2	2	18
OG0001501	2	2	2	2	2	1	2	3	2	18
OG0001502	2	2	1	2	4	2	1	2	2	18
OG0001503	2	2	2	2	2	2	2	2	2	18
OG0001504	1	1	1	1	5	2	3	1	3	18
OG0001505	3	6	0	0	6	2	1	0	0	18
OG0001506	2	11	1	1	0	0	0	2	1	18
OG0001507	2	3	1	1	2	2	2	2	3	18
OG0001508	2	5	1	2	2	2	2	1	1	18
OG0001509	2	4	0	1	3	3	2	1	2	18
OG0001510	1	3	0	2	7	2	2	0	1	18
OG0001511	1	2	1	3	2	2	2	3	2	18
OG0001512	2	2	2	2	2	2	2	2	2	18
OG0001513	2	2	4	2	2	2	2	1	1	18
OG0001514	2	2	2	1	2	2	2	1	4	18
OG0001515	1	6	1	1	3	2	2	1	1	18
OG0001516	2	2	2	2	2	2	2	2	2	18
OG0001517	2	1	3	4	2	1	2	1	2	18
OG0001518	1	0	1	3	5	5	1	1	1	18
OG0001519	2	2	2	2	2	2	2	2	2	18
OG0001520	1	10	1	1	1	1	1	1	1	18
OG0001521	1	2	0	3	6	4	0	0	2	18
OG0001522	2	2	1	2	2	2	2	3	2	18
OG0001523	3	2	2	1	2	1	1	2	4	18
OG0001524	2	3	1	2	2	2	2	2	2	18
OG0001525	1	9	2	1	1	1	1	1	1	18
OG0001526	2	2	2	2	2	2	2	2	2	18
OG0001527	2	2	2	2	2	2	2	2	2	18
OG0001528	2	3	2	2	2	2	3	1	1	18
OG0001529	2	1	4	1	3	1	1	1	4	18
OG0001530	1	1	0	6	3	1	6	0	0	18
OG0001531	3	1	2	3	4	1	1	1	2	18
OG0001532	2	5	0	1	1	2	5	1	1	18
OG0001533	1	1	0	3	3	3	6	0	1	18
OG0001534	2	2	2	2	2	2	2	2	2	18
OG0001535	1	0	0	2	2	13	0	0	0	18
OG0001536	2	2	0	2	2	4	2	1	3	18
OG0001537	1	9	0	0	3	3	0	0	2	18
OG0001538	1	1	0	2	1	3	3	3	4	18
OG0001539	1	0	0	0	0	1	16	0	0	18
OG0001540	1	5	0	6	6	0	0	0	0	18
OG0001541	1	1	2	1	2	2	7	0	2	18
OG0001542	1	2	0	1	1	1	12	0	0	18
OG0001543	1	5	0	2	3	6	1	0	0	18
OG0001544	1	6	1	2	5	2	0	1	0	18
OG0001545	0	16	0	0	0	2	0	0	0	18
OG0001546	0	2	0	0	14	0	2	0	0	18
OG0001547	0	17	0	0	1	0	0	0	0	18
OG0001548	0	18	0	0	0	0	0	0	0	18
OG0001549	0	8	0	3	4	1	0	1	1	18
OG0001550	0	6	0	1	2	3	4	2	0	18
OG0001551	0	2	1	2	8	4	1	0	0	18
OG0001552	0	3	0	1	2	3	8	0	1	18
OG0001553	0	3	1	2	4	3	1	2	2	18
OG0001554	0	2	1	4	5	2	3	0	1	18
OG0001555	0	3	6	0	3	0	3	0	3	18
OG0001556	0	1	0	7	2	4	3	1	0	18
OG0001557	0	1	0	1	3	9	3	0	1	18
OG0001558	0	18	0	0	0	0	0	0	0	18
OG0001559	0	3	0	1	5	8	0	1	0	18
OG0001560	0	2	0	0	1	12	2	0	1	18
OG0001561	0	4	0	2	0	10	0	0	2	18
OG0001562	0	5	0	2	2	6	3	0	0	18
OG0001563	0	2	1	0	9	2	2	1	1	18
OG0001564	0	11	2	0	1	0	2	2	0	18
OG0001565	0	3	0	0	0	1	13	1	0	18
OG0001566	0	3	0	1	1	4	4	4	1	18
OG0001567	0	3	0	3	6	4	0	0	2	18
OG0001568	0	3	1	2	9	2	0	0	1	18
OG0001569	0	8	2	1	3	1	2	0	1	18
OG0001570	0	2	0	4	8	4	0	0	0	18
OG0001571	0	2	1	4	7	2	0	0	2	18
OG0001572	0	1	0	0	1	16	0	0	0	18
OG0001573	0	13	1	1	0	1	1	0	1	18
OG0001574	0	2	0	10	2	2	0	2	0	18
OG0001575	0	2	3	0	2	2	7	1	1	18
OG0001576	0	0	1	1	3	5	5	1	2	18
OG0001577	0	0	18	0	0	0	0	0	0	18
OG0001578	0	0	18	0	0	0	0	0	0	18
OG0001579	0	0	18	0	0	0	0	0	0	18
OG0001580	0	0	0	18	0	0	0	0	0	18
OG0001581	0	0	0	16	0	1	0	0	1	18
OG0001582	0	0	0	1	0	17	0	0	0	18
OG0001583	0	0	0	17	0	1	0	0	0	18
OG0001584	0	0	0	3	1	1	11	2	0	18
OG0001585	0	0	0	2	0	0	8	2	6	18
OG0001586	0	0	0	1	1	15	0	0	1	18
OG0001587	0	0	0	0	0	0	0	0	18	18
OG0001588	17	0	0	0	0	0	0	0	0	17
OG0001589	3	1	1	2	5	2	0	1	2	17
OG0001590	17	0	0	0	0	0	0	0	0	17
OG0001591	8	0	0	1	0	7	1	0	0	17
OG0001592	4	2	1	0	2	2	2	2	2	17
OG0001593	2	3	7	4	0	1	0	0	0	17
OG0001594	1	5	1	1	1	1	6	0	1	17
OG0001595	2	3	1	2	2	2	1	2	2	17
OG0001596	2	2	2	1	2	2	2	2	2	17
OG0001597	1	1	1	2	5	2	2	1	2	17
OG0001598	2	2	1	2	2	2	2	2	2	17
OG0001599	3	0	0	3	2	2	4	1	2	17
OG0001600	1	2	4	2	1	1	2	1	3	17
OG0001601	3	1	1	1	3	5	1	1	1	17
OG0001602	1	0	3	4	1	0	6	0	2	17
OG0001603	17	0	0	0	0	0	0	0	0	17
OG0001604	2	2	3	1	2	2	1	2	2	17
OG0001605	1	2	1	2	6	2	1	1	1	17
OG0001606	2	3	1	2	2	2	2	2	1	17
OG0001607	2	2	1	1	2	2	2	2	3	17
OG0001608	2	2	1	1	3	3	1	1	3	17
OG0001609	2	2	2	1	2	2	2	2	2	17
OG0001610	1	3	1	1	4	4	1	1	1	17
OG0001611	2	2	1	2	2	2	2	2	2	17
OG0001612	2	3	2	1	3	2	2	1	1	17
OG0001613	2	2	3	1	2	3	2	1	1	17
OG0001614	2	2	2	2	2	2	1	2	2	17
OG0001615	2	2	2	1	2	2	2	2	2	17
OG0001616	2	2	1	2	2	2	2	2	2	17
OG0001617	2	2	2	1	2	2	2	2	2	17
OG0001618	4	1	1	1	1	1	4	2	2	17
OG0001619	2	2	1	2	2	2	2	2	2	17
OG0001620	1	1	2	3	1	1	3	1	4	17
OG0001621	1	4	1	1	3	2	1	2	2	17
OG0001622	2	2	1	2	2	2	2	2	2	17
OG0001623	2	2	1	2	2	2	2	2	2	17
OG0001624	2	2	1	2	3	2	2	1	2	17
OG0001625	2	2	1	1	3	3	3	1	1	17
OG0001626	2	3	1	3	2	2	2	1	1	17
OG0001627	2	2	1	2	2	2	2	2	2	17
OG0001628	2	2	1	2	2	2	2	2	2	17
OG0001629	2	2	1	3	2	2	2	1	2	17
OG0001630	3	5	1	1	3	1	3	0	0	17
OG0001631	2	2	3	1	2	1	3	2	1	17
OG0001632	1	2	2	1	1	1	7	1	1	17
OG0001633	1	2	2	2	4	2	2	1	1	17
OG0001634	2	1	0	6	2	1	3	0	2	17
OG0001635	2	4	2	0	2	2	2	0	3	17
OG0001636	2	2	3	1	2	2	2	1	2	17
OG0001637	2	2	1	2	2	2	2	2	2	17
OG0001638	3	4	3	1	1	0	1	2	2	17
OG0001639	8	1	1	2	1	1	1	1	1	17
OG0001640	1	2	1	1	1	1	2	2	6	17
OG0001641	2	2	1	2	2	1	2	2	3	17
OG0001642	3	2	2	2	2	1	2	1	2	17
OG0001643	1	1	0	2	0	4	2	3	4	17
OG0001644	5	4	1	0	4	1	1	1	0	17
OG0001645	1	0	0	1	2	0	2	1	10	17
OG0001646	1	2	1	4	2	1	2	1	3	17
OG0001647	1	2	3	2	1	2	2	3	1	17
OG0001648	2	2	1	2	2	2	2	2	2	17
OG0001649	2	3	2	1	2	2	2	1	2	17
OG0001650	2	2	1	2	2	2	2	2	2	17
OG0001651	1	1	6	1	3	1	2	1	1	17
OG0001652	2	2	1	2	2	2	2	2	2	17
OG0001653	2	2	1	2	2	2	2	2	2	17
OG0001654	2	2	1	2	2	2	2	2	2	17
OG0001655	2	2	1	2	2	2	2	2	2	17
OG0001656	3	1	1	2	2	2	2	2	2	17
OG0001657	2	2	2	2	2	2	2	1	2	17
OG0001658	2	2	2	1	2	2	2	2	2	17
OG0001659	3	1	1	2	3	2	3	0	2	17
OG0001660	1	0	0	0	1	2	3	4	6	17
OG0001661	2	2	1	2	2	2	2	2	2	17
OG0001662	2	2	1	2	2	2	2	2	2	17
OG0001663	4	1	1	1	1	1	1	4	3	17
OG0001664	2	2	1	2	2	2	2	2	2	17
OG0001665	2	1	6	1	2	2	1	1	1	17
OG0001666	2	2	2	2	2	2	2	1	2	17
OG0001667	2	2	1	2	2	1	2	1	4	17
OG0001668	2	2	1	2	1	1	2	2	4	17
OG0001669	1	1	1	1	2	1	1	5	4	17
OG0001670	2	1	1	1	2	2	2	4	2	17
OG0001671	1	2	2	3	2	2	2	1	2	17
OG0001672	1	0	0	3	3	5	4	0	1	17
OG0001673	2	2	1	2	2	2	2	2	2	17
OG0001674	1	2	0	10	1	1	2	0	0	17
OG0001675	1	1	9	1	1	1	1	1	1	17
OG0001676	1	4	4	1	2	2	1	1	1	17
OG0001677	3	2	2	1	1	1	4	2	1	17
OG0001678	1	4	2	1	2	2	3	1	1	17
OG0001679	1	6	1	1	2	3	1	1	1	17
OG0001680	1	6	1	2	2	2	2	0	1	17
OG0001681	1	15	1	0	0	0	0	0	0	17
OG0001682	1	2	2	1	3	6	0	1	1	17
OG0001683	2	2	2	1	2	2	2	2	2	17
OG0001684	1	2	0	2	2	2	6	1	1	17
OG0001685	1	4	2	4	1	1	2	1	1	17
OG0001686	1	2	0	3	3	2	0	1	5	17
OG0001687	1	1	0	4	4	0	5	0	2	17
OG0001688	2	2	1	2	2	2	2	2	2	17
OG0001689	1	2	0	1	5	4	2	0	2	17
OG0001690	2	2	1	1	2	2	2	2	3	17
OG0001691	1	2	1	2	2	2	2	3	2	17
OG0001692	2	2	3	2	1	1	1	2	3	17
OG0001693	1	0	2	3	3	4	3	0	1	17
OG0001694	2	0	0	2	3	1	2	1	6	17
OG0001695	2	1	4	1	2	2	2	1	2	17
OG0001696	2	2	0	0	5	7	1	0	0	17
OG0001697	1	2	1	1	3	2	6	0	1	17
OG0001698	2	1	2	2	2	2	2	1	3	17
OG0001699	1	2	2	2	4	2	2	1	1	17
OG0001700	2	1	2	3	2	2	2	1	2	17
OG0001701	1	8	1	2	1	1	1	1	1	17
OG0001702	1	4	0	3	5	0	3	1	0	17
OG0001703	1	3	0	3	1	4	2	0	3	17
OG0001704	2	0	3	5	1	2	2	0	2	17
OG0001705	2	0	0	0	1	4	9	1	0	17
OG0001706	1	4	0	2	5	3	2	0	0	17
OG0001707	7	0	0	2	4	1	0	0	3	17
OG0001708	2	2	1	2	2	2	2	2	2	17
OG0001709	0	5	0	3	1	3	4	0	1	17
OG0001710	0	15	0	0	1	0	1	0	0	17
OG0001711	0	2	0	2	2	0	6	2	3	17
OG0001712	0	6	0	1	1	9	0	0	0	17
OG0001713	0	7	0	3	4	3	0	0	0	17
OG0001714	0	3	0	1	5	4	4	0	0	17
OG0001715	0	17	0	0	0	0	0	0	0	17
OG0001716	0	2	2	2	3	2	2	2	2	17
OG0001717	0	17	0	0	0	0	0	0	0	17
OG0001718	0	3	0	5	4	1	0	1	3	17
OG0001719	0	1	0	2	5	3	5	0	1	17
OG0001720	0	4	0	2	4	6	0	0	1	17
OG0001721	0	3	1	1	1	2	9	0	0	17
OG0001722	0	1	0	5	3	3	0	1	4	17
OG0001723	0	1	0	3	3	1	9	0	0	17
OG0001724	0	2	0	1	3	3	7	1	0	17
OG0001725	0	2	0	1	1	8	1	1	3	17
OG0001726	0	1	1	2	2	1	7	2	1	17
OG0001727	0	1	0	1	2	13	0	0	0	17
OG0001728	0	3	0	2	3	9	0	0	0	17
OG0001729	0	2	2	2	4	0	3	0	4	17
OG0001730	0	2	1	3	4	0	4	1	2	17
OG0001731	0	6	0	1	2	1	2	4	1	17
OG0001732	0	17	0	0	0	0	0	0	0	17
OG0001733	0	2	4	1	2	2	2	2	2	17
OG0001734	0	1	0	0	4	11	1	0	0	17
OG0001735	0	1	1	2	2	0	11	0	0	17
OG0001736	0	1	1	2	4	1	4	0	4	17
OG0001737	0	0	17	0	0	0	0	0	0	17
OG0001738	0	0	1	1	4	2	7	0	2	17
OG0001739	0	0	17	0	0	0	0	0	0	17
OG0001740	0	0	1	5	0	8	0	0	3	17
OG0001741	0	0	0	17	0	0	0	0	0	17
OG0001742	0	0	0	17	0	0	0	0	0	17
OG0001743	0	0	0	4	0	10	0	0	3	17
OG0001744	0	0	0	1	2	2	12	0	0	17
OG0001745	0	0	0	1	10	0	5	1	0	17
OG0001746	0	0	0	0	17	0	0	0	0	17
OG0001747	0	0	0	0	2	0	3	12	0	17
OG0001748	0	0	0	0	7	1	8	0	1	17
OG0001749	0	0	0	0	0	17	0	0	0	17
OG0001750	0	0	0	0	0	0	0	0	17	17
OG0001751	1	4	1	3	3	2	1	0	1	16
OG0001752	2	0	6	1	2	1	3	0	1	16
OG0001753	1	1	0	2	2	3	4	1	2	16
OG0001754	12	2	0	0	1	0	1	0	0	16
OG0001755	6	3	1	1	1	1	1	1	1	16
OG0001756	3	1	1	5	0	1	4	0	1	16
OG0001757	2	2	1	2	2	2	3	1	1	16
OG0001758	6	2	0	1	3	1	1	1	1	16
OG0001759	1	3	1	1	3	2	1	1	3	16
OG0001760	2	1	0	2	2	2	2	2	3	16
OG0001761	2	2	1	2	2	2	1	2	2	16
OG0001762	1	2	2	1	2	2	2	2	2	16
OG0001763	2	2	2	1	2	1	2	2	2	16
OG0001764	2	2	2	2	3	1	1	1	2	16
OG0001765	4	2	1	2	2	2	1	1	1	16
OG0001766	1	9	1	0	1	1	1	1	1	16
OG0001767	2	2	1	1	2	2	1	2	3	16
OG0001768	1	2	1	4	2	2	2	1	1	16
OG0001769	2	2	2	2	2	2	2	1	1	16
OG0001770	2	2	1	2	2	2	2	1	2	16
OG0001771	1	1	1	1	2	1	5	1	3	16
OG0001772	2	2	1	1	2	2	2	2	2	16
OG0001773	1	3	1	1	2	2	2	2	2	16
OG0001774	2	3	0	1	3	1	4	1	1	16
OG0001775	1	2	2	1	2	2	2	2	2	16
OG0001776	3	3	0	1	2	0	1	3	3	16
OG0001777	2	2	1	2	1	2	2	2	2	16
OG0001778	2	2	1	1	2	2	2	2	2	16
OG0001779	3	2	1	1	2	2	1	2	2	16
OG0001780	2	2	2	1	2	2	2	1	2	16
OG0001781	1	2	1	1	3	3	1	2	2	16
OG0001782	2	1	4	0	2	2	1	2	2	16
OG0001783	2	4	1	0	4	2	1	1	1	16
OG0001784	6	3	1	1	1	1	1	1	1	16
OG0001785	1	2	1	2	1	2	6	1	0	16
OG0001786	1	2	0	2	3	2	4	0	2	16
OG0001787	1	2	2	2	1	2	4	1	1	16
OG0001788	1	2	2	1	2	2	2	1	3	16
OG0001789	2	3	2	1	2	2	2	1	1	16
OG0001790	1	2	1	1	1	1	7	1	1	16
OG0001791	5	1	3	1	1	2	1	1	1	16
OG0001792	2	2	2	1	2	2	1	2	2	16
OG0001793	2	1	1	2	2	2	2	2	2	16
OG0001794	1	0	0	1	3	2	4	2	3	16
OG0001795	2	2	0	2	2	2	2	2	2	16
OG0001796	2	2	1	2	2	2	1	2	2	16
OG0001797	2	3	2	1	2	1	2	1	2	16
OG0001798	2	1	1	2	2	2	2	2	2	16
OG0001799	1	3	0	0	0	0	1	2	9	16
OG0001800	1	2	1	2	2	2	2	2	2	16
OG0001801	2	2	1	1	2	2	2	2	2	16
OG0001802	1	2	0	2	8	1	1	0	1	16
OG0001803	2	2	1	2	1	2	2	2	2	16
OG0001804	1	1	0	1	2	11	0	0	0	16
OG0001805	2	2	1	1	3	1	3	2	1	16
OG0001806	1	11	2	2	0	0	0	0	0	16
OG0001807	2	1	1	2	2	2	1	3	2	16
OG0001808	1	1	3	0	1	0	9	0	1	16
OG0001809	2	2	2	1	2	2	2	1	2	16
OG0001810	2	2	2	3	1	1	2	1	2	16
OG0001811	2	3	1	0	2	1	1	3	3	16
OG0001812	3	2	1	1	3	2	2	1	1	16
OG0001813	3	2	0	2	2	2	2	1	2	16
OG0001814	1	5	1	1	2	2	2	1	1	16
OG0001815	3	1	0	1	2	1	7	1	0	16
OG0001816	2	1	1	2	1	1	3	1	4	16
OG0001817	1	1	2	1	1	1	1	4	4	16
OG0001818	1	1	1	1	3	2	1	1	5	16
OG0001819	2	2	1	2	2	2	2	1	2	16
OG0001820	2	1	2	2	2	1	2	2	2	16
OG0001821	4	4	1	1	2	1	1	1	1	16
OG0001822	1	2	1	2	5	2	1	1	1	16
OG0001823	2	2	1	1	3	2	2	1	2	16
OG0001824	1	7	0	1	4	1	2	0	0	16
OG0001825	3	4	1	0	3	4	1	0	0	16
OG0001826	2	2	1	3	2	2	2	1	1	16
OG0001827	1	2	2	0	0	11	0	0	0	16
OG0001828	2	2	1	1	2	2	2	2	2	16
OG0001829	1	1	0	1	6	2	3	1	1	16
OG0001830	2	2	2	1	1	2	2	2	2	16
OG0001831	2	2	2	2	1	2	2	1	2	16
OG0001832	1	3	0	2	2	2	2	1	3	16
OG0001833	1	3	0	3	6	0	1	0	2	16
OG0001834	2	1	1	2	1	1	3	1	4	16
OG0001835	1	3	1	1	4	2	1	2	1	16
OG0001836	3	5	0	1	2	2	1	1	1	16
OG0001837	2	2	4	1	1	2	2	1	1	16
OG0001838	1	2	1	2	2	2	2	2	2	16
OG0001839	1	3	1	2	2	4	3	0	0	16
OG0001840	1	1	0	1	3	2	8	0	0	16
OG0001841	2	1	0	3	5	3	1	0	1	16
OG0001842	2	6	0	1	6	1	0	0	0	16
OG0001843	1	5	3	1	1	1	2	1	1	16
OG0001844	1	2	3	1	3	1	3	1	1	16
OG0001845	1	0	2	3	1	1	7	0	1	16
OG0001846	1	2	1	1	3	2	2	3	1	16
OG0001847	2	1	0	4	5	1	2	0	1	16
OG0001848	2	2	1	2	2	2	1	2	2	16
OG0001849	1	2	1	2	2	2	4	1	1	16
OG0001850	1	2	0	3	1	2	2	1	4	16
OG0001851	2	2	1	3	2	2	1	1	2	16
OG0001852	2	2	0	2	2	2	2	2	2	16
OG0001853	1	1	1	2	10	0	0	1	0	16
OG0001854	1	10	0	1	2	1	1	0	0	16
OG0001855	2	1	0	1	4	5	1	1	1	16
OG0001856	1	3	2	1	1	1	3	2	2	16
OG0001857	1	3	0	0	1	0	10	0	1	16
OG0001858	2	1	1	0	2	2	2	4	2	16
OG0001859	3	0	3	0	2	3	2	0	3	16
OG0001860	4	2	0	2	1	7	0	0	0	16
OG0001861	1	0	7	0	1	3	3	0	1	16
OG0001862	2	0	0	2	2	0	10	0	0	16
OG0001863	3	2	1	1	2	1	1	2	3	16
OG0001864	1	1	3	1	2	1	2	3	2	16
OG0001865	1	1	0	0	1	1	1	7	4	16
OG0001866	1	4	0	2	2	2	2	0	3	16
OG0001867	2	0	0	3	5	2	2	0	2	16
OG0001868	1	1	1	1	6	0	1	0	5	16
OG0001869	2	1	0	2	3	2	2	2	2	16
OG0001870	1	1	3	2	6	2	0	0	1	16
OG0001871	1	1	0	1	6	7	0	0	0	16
OG0001872	7	2	0	1	0	6	0	0	0	16
OG0001873	1	3	1	1	4	1	1	1	3	16
OG0001874	1	2	2	2	4	1	3	0	1	16
OG0001875	1	3	1	3	1	1	2	3	1	16
OG0001876	1	3	0	2	4	4	0	0	2	16
OG0001877	1	4	0	1	2	5	0	0	3	16
OG0001878	1	3	0	2	1	6	2	0	1	16
OG0001879	1	0	1	0	0	5	3	0	6	16
OG0001880	1	7	0	2	0	0	4	0	2	16
OG0001881	0	3	0	3	5	4	1	0	0	16
OG0001882	0	16	0	0	0	0	0	0	0	16
OG0001883	0	16	0	0	0	0	0	0	0	16
OG0001884	0	16	0	0	0	0	0	0	0	16
OG0001885	0	5	6	1	0	0	3	0	1	16
OG0001886	0	14	0	2	0	0	0	0	0	16
OG0001887	0	14	0	0	0	0	1	0	1	16
OG0001888	0	9	0	3	1	0	0	1	2	16
OG0001889	0	3	1	3	3	0	5	0	1	16
OG0001890	0	16	0	0	0	0	0	0	0	16
OG0001891	0	3	0	2	6	2	1	1	1	16
OG0001892	0	4	0	2	2	2	0	1	5	16
OG0001893	0	1	0	0	8	2	0	1	4	16
OG0001894	0	14	0	0	1	1	0	0	0	16
OG0001895	0	16	0	0	0	0	0	0	0	16
OG0001896	0	3	1	2	7	3	0	0	0	16
OG0001897	0	2	0	4	3	1	4	1	1	16
OG0001898	0	1	0	0	2	1	12	0	0	16
OG0001899	0	5	2	3	1	3	2	0	0	16
OG0001900	0	15	0	0	0	1	0	0	0	16
OG0001901	0	6	0	0	0	1	8	0	1	16
OG0001902	0	4	0	1	10	1	0	0	0	16
OG0001903	0	2	0	0	3	8	0	0	3	16
OG0001904	0	5	2	2	2	0	4	1	0	16
OG0001905	0	4	0	3	7	1	0	0	1	16
OG0001906	0	3	0	0	1	1	2	3	6	16
OG0001907	0	6	1	3	4	0	0	0	2	16
OG0001908	0	1	1	5	2	1	4	0	2	16
OG0001909	0	1	0	7	2	3	3	0	0	16
OG0001910	0	1	0	2	5	5	1	0	2	16
OG0001911	0	4	0	0	7	1	0	2	2	16
OG0001912	0	0	16	0	0	0	0	0	0	16
OG0001913	0	0	16	0	0	0	0	0	0	16
OG0001914	0	0	7	5	0	3	0	0	1	16
OG0001915	0	0	1	0	0	14	0	0	1	16
OG0001916	0	0	3	5	0	3	0	0	5	16
OG0001917	0	0	9	5	0	0	2	0	0	16
OG0001918	0	0	5	0	2	5	1	3	0	16
OG0001919	0	0	0	1	1	2	0	2	10	16
OG0001920	0	0	0	2	1	9	1	0	3	16
OG0001921	0	0	0	3	7	5	0	1	0	16
OG0001922	0	0	0	1	2	5	4	4	0	16
OG0001923	0	0	0	1	0	12	0	0	3	16
OG0001924	0	0	0	0	16	0	0	0	0	16
OG0001925	0	0	0	0	1	1	0	9	5	16
OG0001926	0	0	0	0	0	3	6	5	2	16
OG0001927	0	0	0	0	0	0	16	0	0	16
OG0001928	0	0	0	0	0	0	0	16	0	16
OG0001929	1	1	0	2	7	2	0	0	2	15
OG0001930	3	1	0	1	2	1	3	2	2	15
OG0001931	12	0	0	0	0	0	3	0	0	15
OG0001932	6	1	1	1	1	1	1	2	1	15
OG0001933	9	4	0	0	0	1	0	0	1	15
OG0001934	6	1	1	3	0	0	1	2	1	15
OG0001935	5	0	0	1	5	1	0	0	3	15
OG0001936	4	3	0	1	2	2	1	1	1	15
OG0001937	15	0	0	0	0	0	0	0	0	15
OG0001938	4	7	0	1	1	1	1	0	0	15
OG0001939	2	2	1	2	2	2	2	1	1	15
OG0001940	15	0	0	0	0	0	0	0	0	15
OG0001941	2	1	1	3	2	2	2	1	1	15
OG0001942	1	2	2	2	1	2	2	1	2	15
OG0001943	2	2	1	2	2	2	2	2	0	15
OG0001944	2	2	1	0	2	2	2	2	2	15
OG0001945	1	2	1	2	1	3	1	1	3	15
OG0001946	1	1	0	1	1	0	11	0	0	15
OG0001947	2	2	2	1	1	2	2	1	2	15
OG0001948	15	0	0	0	0	0	0	0	0	15
OG0001949	2	1	1	1	3	1	2	1	3	15
OG0001950	2	2	1	2	1	2	1	2	2	15
OG0001951	2	1	1	3	1	3	1	1	2	15
OG0001952	4	1	2	2	2	1	1	1	1	15
OG0001953	2	1	2	2	2	2	2	1	1	15
OG0001954	2	1	2	3	1	1	1	2	2	15
OG0001955	4	2	1	1	1	1	3	1	1	15
OG0001956	1	2	4	2	1	1	2	1	1	15
OG0001957	1	2	2	1	2	2	1	2	2	15
OG0001958	1	2	3	1	1	2	2	1	2	15
OG0001959	1	1	1	2	2	1	2	1	4	15
OG0001960	2	1	1	2	2	1	2	2	2	15
OG0001961	1	4	3	1	1	1	2	1	1	15
OG0001962	4	1	2	2	1	1	1	1	2	15
OG0001963	1	2	1	2	2	2	1	2	2	15
OG0001964	1	1	2	2	2	2	2	1	2	15
OG0001965	1	6	0	1	1	1	2	1	2	15
OG0001966	2	2	2	1	1	1	2	2	2	15
OG0001967	2	1	2	1	1	2	2	2	2	15
OG0001968	1	2	1	1	1	2	1	3	3	15
OG0001969	2	3	1	2	2	2	1	1	1	15
OG0001970	2	3	0	1	3	1	1	0	4	15
OG0001971	3	2	1	2	2	2	1	1	1	15
OG0001972	1	1	7	1	1	1	1	1	1	15
OG0001973	4	1	0	1	5	0	3	1	0	15
OG0001974	5	0	0	0	0	0	0	5	5	15
OG0001975	2	1	2	2	3	1	2	1	1	15
OG0001976	2	2	2	1	1	2	2	1	2	15
OG0001977	1	3	1	2	1	2	1	2	2	15
OG0001978	1	2	1	1	3	2	2	1	2	15
OG0001979	1	2	1	0	3	0	6	0	2	15
OG0001980	1	0	0	3	2	3	4	1	1	15
OG0001981	2	1	1	1	1	2	2	1	4	15
OG0001982	1	1	0	2	2	2	2	1	4	15
OG0001983	4	6	1	1	2	1	0	0	0	15
OG0001984	1	1	1	1	1	1	2	4	3	15
OG0001985	2	2	1	1	1	2	2	2	2	15
OG0001986	1	1	1	2	3	1	2	1	3	15
OG0001987	2	1	0	2	2	1	5	1	1	15
OG0001988	1	1	0	0	0	0	1	5	7	15
OG0001989	2	2	1	2	1	2	1	2	2	15
OG0001990	2	1	2	1	1	1	5	1	1	15
OG0001991	2	2	1	1	2	2	2	1	2	15
OG0001992	4	2	0	2	3	0	3	0	1	15
OG0001993	2	2	2	2	1	2	2	1	1	15
OG0001994	5	1	1	3	1	1	1	1	1	15
OG0001995	1	4	1	2	2	1	2	1	1	15
OG0001996	2	2	1	2	2	2	1	1	2	15
OG0001997	1	2	0	2	2	2	2	2	2	15
[truncated: 20,761 more rows]
